# Supplementary material for: Comparative Panel Sequencing of DNA Variants in cf-, ev- and tumorDNA for Pancreatic Ductal Adenocarcinoma Patients
Source: MDPI journal article supplement (doi:10.3390/cancers14041074), 2022-02-21
Supplement: s1 [file s1]

## Supplemental material

**Supplemental Table S1:** Tumor-gene panel. Gene list of TUM01 panel (CeGaT GmbH) used for DNA sequencing.

| <b>TUM01 panel: Gene list (766 genes)</b>                                                                                            |
|--------------------------------------------------------------------------------------------------------------------------------------|
| AAK1, ABCB1, ABCG2, ABL1, ABL2, ABRAXAS1, ACD, ACVR1, ADGRA2, ADRB1, ADRB2, AIP, AIRE, AJUBA, AKT1, AKT2, AKT3, ALK,                 |
| ALOX12B, AMER1, ANKRD26, APC, APLNR, APOBEC3A, APOBEC3B, AR, ARAF, ARHGAP35, ARID1A, ARID1B, ARID2, ARID5B, ASXL1,                   |
| ASXL2, ATM, ATP1A1, ATR, ATRX, AURKA, AURKB, AURKC, AXIN1, AXIN2, AXL, B2M, BAP1, BARD1, BAX, BCHE, BCL10, BCL11A,                   |
| BCL11B, BCL2, BCL3, BCL6, BCL9, BCL9L, BCOR, BCORL1, BCR, BIRC2, BIRC3, BIRC5, BLM, BMI1, BMPR1A, BRAF, BRCA1, BRCA2, BRD3,          |
| BRD4, BRD7, BRIP1, BTK, BUB1B, CALR, CAMK2G, CARD11, CASP8, CBFB, CBL, CBLB, CBLC, CCDC6, CCND1, CCND2, CCND3, CCNE1,                |
| CD274, CD79A, CD79B, CD82, CDC73, CDH1, CDH11, CDH2, CDH5, CDK1, CDK12, CDK4, CDK5, CDK6, CDK8, CDKN1A, CDKN1B, CDKN1C,              |
| CDKN2A, CDKN2B, CDKN2C, CEBPA, CENPA, CEP57, CFTR, CHD1, CHD2, CHD4, CHEK1, CHEK2, CIC, CIITA, CKS1B, CNKSR1, COL1A1,                |
| COMT, COQ2, CREB1, CREBBP, CRKL, CRLF2, CRTCL, CRTCC, CSF1R, CSF3R, CSMD1, CSNK1A1, CTCF, CTLA4, CTNNA1, CTNNB1, CTSC,               |
| CUX1, CXCR4, CYLD, CYP1A2, CYP2A7, CYP2B6, CYP2C19, CYP2C8, CYP2C9, CYP2D6, CYP3A4, CYP3A5, CYP4F2, DAXX, DCC, DDB2, DDR1,           |
| DDR2, DDX11, DDX3X, DDX41, DEK, DHFR, DICER1, DIS3L2, DNMT1, DNMT3A, DOT1L, DPYD, E2F3, EBP, EED, EFL1, EGFR, EGLN1,                 |
| EGLN2, EIF1AX, ELAC2, ELF3, EME1, EML4, EMSY, EP300, EPAS1, EPCAM, EPHA2, EPHA3, EPHA4, EPHB4, EPHB6, ERBB2, ERBB3, ERBB4,           |
| ERCC1, ERCC2, ERCC3, ERCC4, ERCC5, ERG, ERFF1, ESR1, ESR2, ETNK1, ETS1, ETV1, ETV4, ETV5, ETV6, EWSR1, EXO1, EXT1, EXT2, EZH1,       |
| EZH2, FAN1, FANCA, FANCB, FANCC, FANCD2, FANCE, FANCF, FANCG, FANCI, FANCL, FANCM, FAS, FAT1, FBXO11, FBXW7, FEN1,                   |
| FES, FGF10, FGF14, FGF19, FGF2, FGF23, FGF3, FGF4, FGF5, FGF6, FGF9, FGFBP1, FGFR1, FGFR2, FGFR3, FGFR4, FH, FLCN, FLI1, FLT1, FLT3, |
| FLT4, FOXA1, FOXA2, FOXE1, FOXL2, FOXO1, FOXO3, FOXP1, FOXQ1, FRK, FRS2, FUBP1, FUS, FYN, G6PD, GALNT12, GATA1, GATA2,               |
| GATA3, GATA4, GATA6, GGT1, GLI1, GLI2, GLI3, GNA11, GNA13, GNAQ, GNAS, GNB3, GPC3, GPER1, GREM1, GRIN2A, GRM3, GSK3A,                |
| GSK3B, GSTP1, H3-3A, H3-3B, H3C2, HABP2, HCK, HDAC1, HDAC2, HDAC6, HGF, HIF1A, HLA-A, HLA-B, HLA-C, HLA-DPA1, HLA-DPB1,              |
| HLA-DQA1, HLA-DQB1, HLA-DRA, HLA-DRB1, HMG2A, HMGCR, HMGN1, HNF1A, HNF1B, HOXB13, HRAS, HSD3B1, HSP90AA1,                            |
| HSP90AB1, HTR2A, ID3, IDH1, IDH2, IDO1, IFNGR1, IFNGR2, IGF1R, IGF2, IGF2R, IKBKB, IKBKE, IKZF1, IKZF3, IL1B, IL1RN, ING4, INPP4A,   |
| INPP4B, INPPL1, INSR, IRF1, IRF2, IRS1, IRS2, IRS4, ITPA, JAK1, JAK2, JAK3, JUN, KAT6A, KDM5A, KDM5C, KDM6A, KDR, KEAP1, KIAA1549,   |
| KIF1B, KIT, KLF2, KLF4, KLHL6, KLLN, KMT2A, KMT2B, KMT2C, KMT2D, KNSTRN, KRAS, KSR1, LATS1, LATS2, LCK, LIG4, LIMK2, LRP1B,          |
| LRRK2, LTK, LYN, LZTR1, MAD2L2, MAF, MAGI1, MAGI2, MAML1, MAP2K1, MAP2K2, MAP2K3, MAP2K4, MAP2K5, MAP2K6, MAP2K7,                    |
| MAP3K1, MAP3K13, MAP3K14, MAP3K3, MAP3K4, MAP3K6, MAP3K8, MAPK1, MAPK11, MAPK12, MAPK14, MAPK3, MAX, MBD1, MC1R,                     |
| MCL1, MDC1, MDH2, MDM2, MDM4, MECOM, MED12, MEF2B, MEN1, MERTK, MET, MGA, MGMT, MITE, MLH1, MLH3, MLLT10, MLLT3,                     |
| MN1, MPL, MRE11, MS4A1, MSH2, MSH3, MSH4, MSH5, MSH6, MSR1, MST1R, MTAP, MTHFR, MTOR, MT-RNR1, MTRR, MUC1, MUTYH,                    |
| MXI1, MYB, MYC, MYCL, MYCN, MYD88, MYH11, MYH9, NAT2, NBN, NCOA1, NCOA3, NCOR1, NF1, NF2, NFE2L2, NFKB1, NFKB2,                      |
| NFKBIA, NFKBIE, NIN, NKX2-1, NLRC5, NOTCH1, NOTCH2, NOTCH3, NOTCH4, NPM1, NQO1, NR1H3, NRAS, NRG1, NRG2, NSD1, NSD2,                 |
| NSD3, NT5C2, NT5E, NTHL1, NTRK1, NTRK2, NTRK3, NUMA1, NUP98, NUTM1, OPRM1, PAK1, PAK3, PAK4, PAK5, PALB2, PALLD, PARP1,              |
| PARP2, PARP4, PAX3, PAX5, PAX7, PBK, PBRM1, PBX1, PDCD1, PDCD1LG2, PDGFA, PDGFB, PDGFC, PDGFD, PDGFRA, PDGFRB, PDIA3,                |
| PDK1, PDPK1, PGR, PHF6, PHOX2B, PIGA, PIK3C2A, PIK3C2B, PIK3C2G, PIK3CA, PIK3CB, PIK3CD, PIK3CG, PIK3R1, PIK3R2, PIK3R3, PIM1,       |
| PKHD1, PLCG1, PLCG2, PLK1, PML, PMS1, PMS2, POLD1, POLE, POLH, POLQ, POT1, PPM1D, PPP2R1A, PPP2R2A, PRDM1, PREX2,                    |
| PRKAR1A, PRKCA, PRKCI, PRKD1, PRKDC, PRKN, PRMT5, PRSS1, PSMB1, PSMB10, PSMB2, PSMB5, PSMB8, PSMB9, PSMD3IP, PSME1,                  |
| PSME2, PSME3, PSPH, PTCH1, PTCH2, PTEN, PTGS2, PTK2, PTK6, PTK7, PTPN11, PTPN12, PTPRC, PTPRD, PTPRS, PTPRT, RABL3, RAC1,            |
| RAC2, RAD21, RAD50, RAD51, RAD51B, RAD51C, RAD51D, RAD54B, RAD54L, RAF1, RALGDS, RARA, RASA1, RASAL1, RB1, RBM10,                    |
| RECQL4, RET, RFC2, RFWD3, RFX5, RFXANK, RFXAP, RHBDF2, RHEB, RHOA, RICTOR, RINT1, RIPK1, RIT1, RNASEL, RNF43, ROS1, RPS20,           |
| RPS6KB1, RPS6KB2, RPTOR, RSF1, RUNX1, RYR1, SAMHD1, SAV1, SBDS, SCG5, SDHA, SDHAF2, SDHB, SDHC, SDHD, SEC23B, SERPINB9,              |
| SETBP1, SETD2, SETDB1, SF3B1, SGK1, SH2B1, SH2B3, SHH, SIK2, SIN3A, SKP2, SLC19A1, SLC26A3, SLCO1B1, SLIT2, SLX4, SMAD3, SMAD4,      |
| SMARCA4, SMARCB1, SMARCD1, SMARCE1, SMC1A, SMC3, SMO, SOCS1, SOX11, SOX2, SOX9, SPEN, SPINK1, SPOP, SPRED1, SPTA1, SRC,              |

|                                                                                                                                   |
|-----------------------------------------------------------------------------------------------------------------------------------|
| SRD5A2, SRGAP1, SRSF2, SRY, SSTR1, SSTR2, SSX1, STAG1, STAG2, STAT1, STAT3, STAT5A, STAT5B, STK11, SUFU, SUZ12, SYK, TAF1, TAF15, |
| TAP1, TAP2, TAPBP, TBK1, TBL1XR1, TBX3, TCF3, TCF4, TCF7L2, TCL1A, TEK, TENT5C, TERC, TERF2IP, TERT, TET1, TET2, TFE3, TGFB1,     |
| TGFBR2, TLR4, TLX1, TMEM127, TMPRSS2, TNFAIP3, TNFRSF11A, TNFRSF13B, TNFRSF14, TNFRSF8, TNFSF11, TNK2, TOP1, TOP2A, TP53,         |
| TP53BP1, TP63, TPMT, TPX2, TRAF2, TRAF3, TRAF5, TRAF6, TRAF7, TRRAP, TSC1, TSC2, TSHR, TTK, TUBB, TYMS, U2AF1, UBE2T, UBR5,       |
| UGT1A1, UGT2B15, UGT2B7, UIMC1, UNG, USP34, USP9X, VEGFA, VEGFB, VHL, VKORC1, WRN, WT1, XIAP, XPA, XPC, XPO1, XRCC1, ,            |
| XRCC2, XRCC3, XRCC5, XRCC6, YAP1, YES1, ZFHX3, ZNF217, ZNF703, ZNRF3, ZRSR2                                                       |
|                                                                                                                                   |
| <b>Detection of selected translocations in these genes</b>                                                                        |
| ALK, BCL2, BCR, BRAF, BRD4, EGFR, ERG, ETV4, ETV6, EWSR1, FGFR1, FGFR2, FGFR3, FUS, MET, MYB, MYC, NOTCH2, NTRK1, PAX3,           |
| PDGFB, RAF1, RARA, RET, ROS1, SSX1, SUZ12, TAF15, TCF3, TFE3, TMPRSS2                                                             |

**Supplemental Table S2:** Additive patient data. Additional data of PDAC patient cohort focusing on therapy.

| Patient | Pre-therapy                          | 1st therapy      | 1st PFS (month) | 2nd therapy                  | 2nd PFS (month) | 3rd therapy           | 3rd PFS (month) | Overall survival (month) |
|---------|--------------------------------------|------------------|-----------------|------------------------------|-----------------|-----------------------|-----------------|--------------------------|
| 1       | FOL                                  | FOL              | 7               | Gem/nab-pac (+ radiotherapy) | 9               | Nal-IRI/5-FU          | 2               | N/A                      |
| 2       | FOL, gem/nab-pac                     | FOL              | 3               | Gem/nab-pac                  | 2               | Mitomycin/vinorelbine | 1               | 8                        |
| 3       | FOL, gem/nab-pac/nal-IRI/5-FU        | FOL              | 9               | Gem/nab-pac                  | 8               | Nal-IRI/5-FU          | 3               | 21                       |
| 4       | FOL, Gem/nab                         | FOL, gem/nab-pac | 3               | /                            | /               | /                     | /               | 3                        |
| 5       | FOL, gem/nab-pac/nal-IRI/5-FU        | FOL              | 3               | Gem/nab-pac                  | 12              | /                     | /               | 18                       |
| 6       | FOL                                  | FOL              | 6               | /                            | /               | /                     | /               | 6                        |
| 7       | Gem/nab-pac/OFF                      | Nal-IRI/5-FU     | 10              | OFF                          | 4               | Dual immunotherapy    | 2               | 29                       |
| 8       | OFF/Rtx/gem/nab-pac/lap/nal-IRI/5-FU | Gem/nab-pac      | 2               | Nal-IRI/5-FU                 | 1               | 5-FU, lap             | 5               | 14                       |
| 9       | FOL/gem/nab                          | FOL              | 7               | Gem/nab-pac                  | /               | /                     | /               | /                        |
| 10      | Nal-IRI/5-FU, gem/cis                | Nal-IRI/5-FU     | 2               | Gem/cis                      | 3               | Everolimus            | N/A             | 7                        |

Abbreviations: 5-FU: 5-Fluorouracil; Cis: Cisplatin; FOL: FOLFIRINOX; Gem: Gemcitabine; Lap: Lapatinib; Nab-pac: nanoparticle albumin-bound paclitaxel; Nal-IRI: Liposomal irinotecan; OFF: Oxaliplatin + 5-FU; PFS: Progression-free survival; Rtx: Rituximab

**Supplemental Table S3:** Exemplary patient data. Information about exemplary PDAC patients utilized for nanoparticle tracking.

| Patient | Gender | Age | Biopsy<br>taken<br>from | Tumor<br>grade | TNM stage      | Metastasis                    |
|---------|--------|-----|-------------------------|----------------|----------------|-------------------------------|
| 1       | Male   | 80  | Pancreas                | G2             | pT3 pN1<br>cM0 | /                             |
| 2       | Female | 43  | Liver                   | G1             | pT3 pN1<br>pM1 | Liver, bones, pe-<br>ritoneum |
| 3       | Male   | 57  | Liver                   | G3             | cT4 cN1 pM1    | Liver                         |
| 4       | Male   | 71  | Liver                   | G3             | cT4 cN+ pM1    | Liver                         |
| 5       | Male   | 60  | Liver                   | /              | cT4 cN1 cM1    | Liver                         |
| 6       | Male   | 87  | Lung                    | /              | cT3 cN1 pM1    | Liver, lung                   |
| 7       | Female | 62  | Liver                   | G2             | cT4 cN1 pM1    | Liver, lung                   |



**Supplemental Table S4:** Healthy proband data. Information about gender and age of healthy probands.

| Healthy proband | Gender | Age |
|-----------------|--------|-----|
| 1               | Male   | 30  |
| 2               | Female | 58  |
| 3               | Female | 31  |
| 4               | Female | 30  |
| 5               | Female | 33  |
| 6               | Male   | 30  |
| 7               | Male   | 26  |

**Supplemental Table S5:** Variant effect prediction for tumorDNA. Numbers of detected variants for CNVs, indels, unfiltered and filtered SNVs (AF  $\leq$  1%).

| <b>Patient<br/>(tumorDNA)</b> | <b>Number of<br/>CNVs</b> | <b>Number of In-<br/>dels</b> | <b>Number of SNVs</b> | <b>Number of SNVs<br/>(AF <math>\leq</math> 1%)</b> |
|-------------------------------|---------------------------|-------------------------------|-----------------------|-----------------------------------------------------|
| <b>1</b>                      | 30                        | 9,932                         | 21,096                | 11,289                                              |
| <b>3</b>                      | 247                       | 9,628                         | 20,698                | 10,617                                              |
| <b>4</b>                      | 2,018                     | 9,639                         | 24,711                | 13,610                                              |
| <b>5</b>                      | 135                       | 9,697                         | 21,627                | 11,782                                              |
| <b>6</b>                      | 333                       | 9,556                         | 23,354                | 12,747                                              |
| <b>7</b>                      | 511                       | 10,694                        | 36,755                | 25,104                                              |
| <b>8</b>                      | 415                       | 9,729                         | 25,427                | 15,275                                              |
| <b>9</b>                      | 1,533                     | 10,239                        | 26,585                | 16,195                                              |
| <b>10</b>                     | 664                       | 9,694                         | 28,055                | 17,039                                              |
| <b>Mean</b>                   | <b>654</b>                | <b>9,868</b>                  | <b>25,368</b>         | <b>14,851</b>                                       |

**Supplemental Table S6:** Variant effect prediction for ev- and cfDNA. Numbers of detected variants for CNVs, indels, unfiltered and filtered SNVs (AF  $\leq$  1%).

| Patient             | Number of CNVs | Number of Indels | Number of SNVs | Number of SNVs (AF $\leq$ 1%) |
|---------------------|----------------|------------------|----------------|-------------------------------|
| 1                   | 252            | 9,565            | 20,109         | 10,381                        |
| 2                   | 129            | 9,839            | 21,779         | 10,880                        |
| 3                   | 141            | 9,302            | 19,983         | 9,931                         |
| 4                   | 151            | 9,853            | 23,142         | 11,874                        |
| 5                   | 157            | 9,170            | 20,626         | 10,824                        |
| 6                   | 225            | 10,122           | 22,126         | 11,441                        |
| 7                   | 82             | 9,611            | 22,332         | 10,728                        |
| 8                   | 115            | 9,611            | 21,408         | 11,268                        |
| 9                   | 51             | 9,986            | 21,931         | 11,426                        |
| 10                  | 305            | 9,468            | 22,622         | 11,693                        |
| <b>Mean (evDNA)</b> | <b>161</b>     | <b>9,653</b>     | <b>21,606</b>  | <b>11,045</b>                 |
| 1                   | 205            | 9,149            | 19,731         | 9,984                         |
| 2                   | 154            | 9,324            | 21,428         | 10,603                        |
| 3                   | 295            | 9,031            | 19,393         | 9,463                         |
| 4                   | 283            | 9,555            | 21,745         | 10,848                        |
| 5                   | 254            | 9,008            | 19,794         | 10,072                        |
| 6                   | 180            | 9,599            | 21,509         | 11,393                        |
| 7                   | 204            | 9,417            | 22,088         | 10,517                        |
| 8                   | 160            | 9,489            | 20,779         | 10,759                        |
| 9                   | 101            | 9,357            | 20,909         | 10,586                        |
| 10                  | 191            | 9,249            | 21,743         | 10,889                        |
| <b>Mean (cfDNA)</b> | <b>203</b>     | <b>9,318</b>     | <b>20,912</b>  | <b>10,511</b>                 |

**Supplemental Table S7:** Variants detected across all patients and samples. Analysis of variants utilizing different databases.

| Variant      | ClinVar                                    | Varsome                                                             | OncoKB         |
|--------------|--------------------------------------------|---------------------------------------------------------------------|----------------|
| ERCC5 G1053R | Benign<br>(VCF000134172.2)                 | Benign                                                              | Unknown effect |
| FLT3 T227M   | Benign<br>(VCF000134447.3)                 | Benign                                                              | Unknown effect |
| GGT1 G84S    | /                                          | Benign                                                              | /              |
| KMT2C C988F  | Benign<br>(VCF000403019.1)                 | Benign                                                              | Unknown effect |
| KMT2C G838S  | /                                          | Uncertain significance                                              | Unknown effect |
| KMT2C I882T  | /                                          | Uncertain significance<br>(VUS with minor patho-<br>genic evidence) | Unknown effect |
| KMT2C R973G  | /                                          | Uncertain significance                                              | Unknown effect |
| KMT2C T316S  | /                                          | Likely benign                                                       | Unknown effect |
| KMT2C W858L  | Uncertain significance<br>(VCF001192208.1) | Uncertain significance<br>(VUS with minor patho-<br>genic evidence) | Unknown effect |
| KMT2C Y987H  | /                                          | Uncertain significance                                              | Unknown effect |
| MAP2K3 R293H | Benign<br>(VCF000768859.1)                 | Likely benign                                                       | /              |
| MAP2K3 R94L  | /                                          | Likely benign                                                       | /              |
| MAP2K3 R96W  | /                                          | Likely benign                                                       | /              |
| MAP2K3 T222M | Benign<br>(VCF000768851.2)                 | Likely benign                                                       | /              |
| MAP2K3 V339M | Benign<br>(VCF000768861.1)                 | Likely benign                                                       | /              |
| NCOR1 G5V    | /                                          | Uncertain significance                                              | Unknown effect |
| PARP4 A899T  | /                                          | Benign                                                              | /              |
| PRSS1 C206S  | Benign<br>(VCF001169143)                   | Uncertain significance                                              | Unknown effect |

**Supplemental Table S8:** Overview of BRCA variants: Analysis of BRCA1 and BRCA2 variants utilizing different databases.

| Variant      | ClinVar                                                                  | Varsome | OncoKB         |
|--------------|--------------------------------------------------------------------------|---------|----------------|
| BRCA1 D397N  | /                                                                        | Benign  | Unknown effect |
| BRCA1 D646N  | Benign<br>(VCV000041808.22)                                              | Benign  | Unknown effect |
| BRCA1 D693N  | Benign<br>(VCV000041808.22)                                              | Benign  | Unknown effect |
| BRCA1 E1038G | Benign<br>(VCV000041815.23)                                              | Benign  | Unknown effect |
| BRCA1 K887R  | /                                                                        | Benign  | Unknown effect |
| BRCA1 K1136R | Benign<br>(VCV000041818.23)                                              | Benign  | Unknown effect |
| BRCA1 K1183R | Uncertain significance<br>(VCV000920987); benign<br>(VCV000041818.23)    | Benign  | Unknown effect |
| BRCA1 P575L  | /                                                                        | Benign  | Unknown effect |
| BRCA1 P824L  | Benign<br>(VCV000041812.24)                                              | Benign  | Unknown effect |
| BRCA1 P871L  | Benign<br>(VCV000041812.24)                                              | Benign  | Unknown effect |
| BRCA1 S104G  | /                                                                        | Benign  | Unknown effect |
| BRCA1 S384G  | /                                                                        | Benign  | Unknown effect |
| BRCA1 S430G  | /                                                                        | Benign  | Unknown effect |
| BRCA1 S463G  | /                                                                        | Benign  | Unknown effect |
| BRCA S471G   | /                                                                        | Benign  | Unknown effect |
| BRCA1 S509G  | Benign<br>(VCV000041827.23)                                              | Benign  | Unknown effect |
| BRCA1 S1317G | /                                                                        | Benign  | Unknown effect |
| BRCA1 S1566G | Benign<br>(VCV000041827.23)                                              | Benign  | Unknown effect |
| BRCA1 S1613G | Benign<br>(VCV000041827.23)                                              | Benign  | Likely neutral |
| BRCA1 S1634G | Benign<br>(VCV000041827.23)                                              | Benign  | Unknown effect |
| BRCA1 E742G  | Uncertain significance<br>(SCV001177685.2); be-<br>nign (SCV000765906.3) | Benign  | Unknown effect |
| BRCA1 E991G  | Benign<br>(VCV000041815.23)                                              | Benign  | Unknown effect |
| BRCA2 N249H  | /                                                                        | Benign  | Unknown effect |
| BRCA2 V2466A | Likely benign<br>(VCV001157128); benign<br>(VCV000133738)                | Benign  | Unknown effect |
| BRCA2 N372H  | Benign (VCV000009329)                                                    | Benign  | Likely neutral |
| BRCA2 A2951T | Benign<br>(VCV000041570.17, 36<br>submissions)                           | Benign  | Likely neutral |

**Supplemental Table S9:** BRCA1 variants per patient. BRCA1 variants found in unfiltered SNVs of tumor-, ev- and cfDNA.

|               | 1     |    |    | 3     |    |    | 4     |    |    | 5     |    |    | 6     |    |    | 7     |    |    | 8     |    |    | 9     |    |    | 10    |    |    |
|---------------|-------|----|----|-------|----|----|-------|----|----|-------|----|----|-------|----|----|-------|----|----|-------|----|----|-------|----|----|-------|----|----|
| BRCA1-variant | tumor | ev | cf |
| D397N         | X     | X  | X  |       |    |    |       |    |    |       |    |    |       |    |    |       |    |    |       |    |    |       |    |    |       |    |    |
| D646N         | X     | X  | X  |       |    |    |       |    |    |       |    |    |       |    |    |       |    |    |       |    |    |       |    |    |       |    |    |
| D693N         | X     | X  | X  |       |    |    |       |    |    |       |    |    |       |    |    |       |    |    |       |    |    |       |    |    |       |    |    |
| E1038G        | X     | X  | X  |       |    |    | X     | X  | X  | X     | X  | X  |       |    |    |       |    |    |       |    |    | X     | X  | X  | X     | X  | X  |
| K887R         | X     | X  | X  |       |    |    | X     | X  | X  | X     | X  | X  |       |    |    |       |    |    |       |    |    | X     | X  | X  | X     | X  | X  |
| K1136R        | X     | X  | X  |       |    |    | X     | X  | X  | X     | X  | X  |       |    |    |       |    |    |       |    |    | X     | X  | X  | X     | X  | X  |
| K1183R        | X     | X  | X  |       |    |    | X     | X  | X  | X     | X  | X  |       |    |    |       |    |    |       |    |    | X     | X  | X  | X     | X  | X  |
| P575L         | X     | X  | X  |       |    |    | X     | X  | X  | X     | X  | X  |       |    | X  |       |    |    |       |    |    | X     | X  | X  | X     | X  | X  |
| P824L         | X     | X  | X  |       |    |    | X     | X  | X  | X     | X  | X  |       |    | X  |       |    |    |       |    |    | X     | X  | X  | X     | X  | X  |
| P871L         | X     | X  | X  |       |    |    | X     | X  | X  | X     | X  | X  |       |    | X  |       |    |    |       |    |    | X     | X  | X  | X     | X  | X  |
| S104G         | X     | X  | X  |       |    |    | X     | X  | X  | X     | X  | X  |       |    |    |       |    |    |       |    |    | X     | X  | X  | X     | X  | X  |
| S384G         | X     | X  | X  |       |    |    | X     | X  | X  | X     | X  | X  |       |    |    |       |    |    |       |    |    | X     | X  | X  | X     | X  | X  |
| S430G         | X     | X  | X  |       |    |    | X     | X  | X  | X     | X  | X  |       |    |    |       |    |    |       |    |    | X     | X  | X  | X     | X  | X  |
| S463G         | X     | X  | X  |       |    |    | X     | X  | X  | X     | X  | X  |       |    |    |       |    |    |       |    |    | X     | X  | X  | X     | X  | X  |
| S471G         | X     | X  | X  |       |    |    | X     | X  | X  | X     | X  | X  |       |    |    |       |    |    |       |    |    | X     | X  | X  | X     | X  | X  |
| S509G         | X     | X  | X  |       |    |    | X     | X  | X  | X     | X  | X  |       |    |    |       |    |    |       |    |    | X     | X  | X  | X     | X  | X  |
| S1317G        | X     | X  | X  |       |    |    | X     | X  | X  | X     | X  | X  |       |    |    |       |    |    |       |    |    | X     | X  | X  | X     | X  | X  |
| S1566G        | X     | X  | X  |       |    |    | X     | X  | X  | X     | X  | X  |       |    |    |       |    |    |       |    |    | X     | X  | X  | X     | X  | X  |
| S1613G        | X     | X  | X  |       |    |    | X     | X  | X  | X     | X  | X  |       |    |    |       |    |    |       |    |    | X     | X  | X  | X     | X  | X  |
| S1634G        | X     | X  | X  |       |    |    | X     | X  | X  | X     | X  | X  |       |    |    |       |    |    |       |    |    | X     | X  | X  | X     | X  | X  |
| E742G         | X     | X  | X  |       |    |    | X     | X  | X  | X     | X  | X  |       |    |    |       |    |    |       |    |    | X     | X  | X  | X     | X  | X  |
| E991G         | X     | X  | X  |       |    |    | X     | X  | X  | X     | X  | X  |       |    |    |       |    |    |       |    |    | X     | X  | X  | X     | X  | X  |

**Supplemental Table S10:** BRCA2 variants per patient. BRCA2 variants found in unfiltered SNVs of tumor-, ev- and cfDNA.

[illegible]

**Supplemental Table S11:** Detected BRCA variants in CNVs. BRCA1 and BRCA2 variants found in tumor-, ev- and cfDNA across all patients.

| Pati-ent |       | Chr | Start    | Stop     | Gene  |      | Call                  | Percentage deviation | Call z-score |
|----------|-------|-----|----------|----------|-------|------|-----------------------|----------------------|--------------|
| 1        | tumor | 17  | 41200457 | 41200457 | BRCA1 | Exon | Duplication           | 46                   | 3.8          |
|          | ev    | /   | /        | /        | /     | /    | /                     | /                    | /            |
|          | cf    | /   | /        | /        | /     | /    | /                     | /                    | /            |
| 3        | tumor | 17  | 41200457 | 41200457 | BRCA1 | Exon | Duplication           | 57                   | 7.1          |
|          | ev    | 17  | 41200457 | 41200457 | BRCA1 | Exon | Duplication           | 49                   | 2.5          |
|          | cf    | 13  | 32900238 | 32900287 | BRCA2 | Exon | Heterozygous deletion | -56                  | -8.6         |
|          |       | 13  | 32918695 | 32918790 | BRCA2 | Exon | Heterozygous deletion | -64                  | -8.6         |
|          | tumor | 13  | 32889798 | 32889814 | BRCA2 | Exon | Duplication           | 152                  | 9.1          |
| 4        | ev    | 17  | 41200457 | 41200457 | BRCA1 | Exon | Duplication           | 58                   | 4.2          |
|          | cf    | 17  | 41277199 | 41277202 | BRCA1 | Exon | Heterozygous deletion | -46                  | -6.1         |
|          |       | 13  | 32918695 | 32918790 | BRCA2 | Exon | Heterozygous deletion | -46                  | -6.1         |
|          |       | 17  | 41200457 | 41200457 | BRCA1 | Exon | Duplication           | 67                   | 4.3          |
|          |       | 17  | 41276034 | 41276113 | BRCA1 | Exon | Heterozygous deletion | -47                  | -4.8         |
|          | tumor | 17  | 41200457 | 41200457 | BRCA1 | Exon | Duplication           | 54                   | 4.0          |
| 5        | ev    | 17  | 41276034 | 41276113 | BRCA1 | Exon | Heterozygous deletion | -53                  | -3.7         |
|          | cf    | 13  | 32889798 | 32889814 | BRCA2 | Exon | Heterozygous deletion | -47                  | -3.3         |
|          |       | 13  | 32890557 | 32890561 | BRCA2 | Exon | Heterozygous deletion | -48                  | -6.3         |
|          |       | 17  | 41276034 | 41276113 | BRCA1 | Exon | Heterozygous deletion | -54                  | -4.0         |
|          | tumor | 13  | 32889798 | 32889814 | BRCA2 | Exon | Duplication           | 62                   | 5.5          |
| 6        | ev    | 17  | 41200457 | 41200457 | BRCA1 | Exon | Duplication           | 63                   | 2.2          |
|          | cf    | 13  | 32918695 | 32918790 | BRCA2 | Exon | Heterozygous deletion | -45                  | -6.8         |
|          |       | 17  | 41276034 | 41276113 | BRCA1 | Exon | Heterozygous deletion | -53                  | -5.9         |
|          | tumor | 13  | 32889798 | 32889814 | BRCA2 | Exon | Duplication           | 72                   | 6.3          |
| 7        |       | 17  | 41198104 | 41198104 | BRCA1 | Exon | Duplication           | 175                  | 24.7         |
|          |       | 17  | 41200457 | 41200457 | BRCA1 | Exon | Duplication           | 205                  | 11.8         |
|          |       | 13  | 32918695 | 32918790 | BRCA2 | Exon | Heterozygous deletion | -52                  | -5.4         |
|          | ev    | 17  | 41276034 | 41276113 | BRCA1 | Exon | Heterozygous deletion | -51                  | -6.1         |
|          |       | cf  | /        | /        | /     | /    | /                     | /                    | /            |
|          | tumor | 13  | 32889798 | 32889814 | BRCA2 | Exon | Duplication           | 83                   | 9.1          |
| 8        |       | 17  | 41200457 | 41200457 | BRCA1 | Exon | Duplication           | 51                   | 7.6          |
|          | ev    | 17  | 41200457 | 41200457 | BRCA1 | Exon | Duplication           | 68                   | 4.3          |
|          | cf    | /   | /        | /        | /     | /    | /                     | /                    | /            |
| 9        | tumor | 13  | 32920964 | 32921033 | BRCA2 | Exon | Heterozygous deletion | -46                  | -2.8         |



|    |       |          |          |          |       |             |                       |     |       |
|----|-------|----------|----------|----------|-------|-------------|-----------------------|-----|-------|
|    | 17    | 41199660 | 41199720 | BRCA1    | Exon  | Duplication | 45                    | 3.2 |       |
|    | 17    | 41200457 | 41200457 | BRCA1    | Exon  | Duplication | 86                    | 2.4 |       |
| ev | 17    | 41200457 | 41200457 | BRCA1    | Exon  | Duplication | 56                    | 2.6 |       |
| cf | /     | /        | /        | /        | /     | /           | /                     | /   |       |
| 10 | tumor | 13       | 32889798 | 32889814 | BRCA2 | Exon        | Duplication           | 60  | 6.1   |
|    |       | 13       | 32900238 | 32900287 | BRCA2 | Exon        | Heterozygous deletion | -45 | -9.2  |
|    |       | 17       | 41258473 | 41258552 | BRCA1 | Exon        | Heterozygous deletion | -48 | -6.4  |
|    |       | 17       | 41258563 | 41258573 | BRCA1 | Exon        | Heterozygous deletion | -53 | -8.2  |
|    | ev    | 17       | 41258563 | 41258573 | BRCA1 | Exon        | Heterozygous deletion | -47 | -10.5 |
|    | cf    | /        | /        | /        | /     | /           | /                     | /   | /     |

Agreements between tumor- and ev- as well as tumor and cfDNA are marked in red

**Supplemental Table S12:** Tier 1+2 actionable variants in tumorDNA. Analysis of actionable variants tier 1 and 2 detected in filteredSNVs(AF≤1%;impact:moderate/high)per patient.

| Patient<br>(tumorDNA) | SNVs: AF ≤1 %<br>(impact: moderate/high) | Actionable<br>variants tier<br>1-4 (PP-2<br>score: damaging) | Actionable variants tier 1+2<br>(PP-2 score: damaging) | Variant                                                                                                                                                                                                                            |
|-----------------------|------------------------------------------|--------------------------------------------------------------|--------------------------------------------------------|------------------------------------------------------------------------------------------------------------------------------------------------------------------------------------------------------------------------------------|
| 1                     | 645                                      | 19                                                           | 7                                                      | IDH2 R261H<br>IDH2 R131H<br>IDH2 R209H<br>RAD51B T107K<br>TP53 Y220N<br>TP53 S127N<br>TP53 Y88N                                                                                                                                    |
| 2                     | /                                        | /                                                            | /                                                      | /                                                                                                                                                                                                                                  |
| 3                     | 607                                      | 2                                                            | 1                                                      | TP53 R141H                                                                                                                                                                                                                         |
| 4                     | 599                                      | 15                                                           | 7                                                      | ATM E2156D<br>PTEN Y155C<br>ROS1 G374A<br>ROS1 G365A<br>TP53 L17R<br>TP53 L198R<br>TP53 L330R                                                                                                                                      |
| 5                     | 614                                      | 13                                                           | 4                                                      | BARD1 R207C<br>TP53 V125G<br>TP53 V86G<br>TP53 V218G                                                                                                                                                                               |
| 6                     | 634                                      | 1                                                            | 1                                                      | RAD51B T107K                                                                                                                                                                                                                       |
| 7                     | 841                                      | 31                                                           | 16                                                     | ATM L89F<br>BRAF L319I<br>CHEK2 K373E<br>CHEK2 K117E<br>CHEK2 K344E<br>CHEK2 K152E<br>CHEK2 K282E<br>CHEK2 K416E<br>FGFR3 P449S<br>FGFR3 P450S<br>FGFR3 P451S<br>NF1 D109E<br>RAD51B T107K<br>TP53 V157F<br>TP53 V25F<br>TP53 V64F |
| 8                     | 683                                      | 10                                                           | 1                                                      | BRAF L319I                                                                                                                                                                                                                         |
| 9                     | 682                                      | 19                                                           | 3                                                      | TP53 Y163C<br>TP53 Y31C<br>TP53 Y70C                                                                                                                                                                                               |
| 10                    | 674                                      | 14                                                           | 4                                                      | ATM P1054R<br>PTEN Y27C<br>TP53 S127Y<br>TP53 S34Y                                                                                                                                                                                 |
| Mean                  | 664                                      | 14                                                           | 5                                                      |                                                                                                                                                                                                                                    |

Agreements between tumor- and ev- as well as tumor- and cfDNA are marked in red

**Supplemental Table S13:** Tier 1+2 actionable variants in evDNA. Analysis of actionable variants tier 1 and 2 detected in filtered SNVs (AF  $\leq$  1%; impact: moderate/high) per patient.

| Patient (evDNA) | SNVs: AF $\leq$ 1 % (impact: moderate/high) | Actionable variants tier 1-4 (PP-2 score: damaging) | Actionable variants tier 1+2 (PP-2 score: damaging) | Variant                                                                                       |
|-----------------|---------------------------------------------|-----------------------------------------------------|-----------------------------------------------------|-----------------------------------------------------------------------------------------------|
| 1               | 572                                         | 9                                                   | 3                                                   | IDH2 R261H<br>IDH2 R131H<br>IDH2 R209H                                                        |
| 2               | 611                                         | 3                                                   | 2                                                   | BRCA2 E394A<br>BRIP1 P47A                                                                     |
| 3               | 561                                         | 9                                                   | 2                                                   | BRAF L319I<br>TP53 R141H                                                                      |
| 4               | 643                                         | 25                                                  | 7                                                   | BRAF L319I<br>PTEN Y155C<br>ROS1 G374A<br>ROS1 G365A<br>TP53 L17R<br>TP53 L198R<br>TP53 L330R |
| 5               | 597                                         | 14                                                  | 1                                                   | BARD1 R207C                                                                                   |
| 6               | 655                                         | 4                                                   | 0                                                   | /                                                                                             |
| 7               | 666                                         | 14                                                  | 5                                                   | ATM L89F<br>FGFR3 P449S<br>FGFR3 P450S<br>FGFR3 P451S<br>NF1 D109E                            |
| 8               | 663                                         | 7                                                   | 0                                                   | /                                                                                             |
| 9               | 641                                         | 15                                                  | 1                                                   | BRAF L319I<br>ATM P1054R                                                                      |
| 10              | 616                                         | 12                                                  | 6                                                   | BRAF L319I<br>PTEN Y27C<br>RAD51B T107K<br>TP53 S127Y<br>TP53 S34Y                            |
| Mean            | 623                                         | 11                                                  | 3                                                   |                                                                                               |

Agreements between tumor- and evDNA are marked in red

**Supplemental Table S14:** Tier 1+2 actionable variants in cfDNA. Analysis of actionable variants tier 1 and 2 detected in filtered SNVs (AF  $\leq$  1%; impact: moderate/high) for patient.

| Patient (cfDNA) | SNVs: AF $\leq$ 1 % (impact: moderate/high) | Actionable variants tier 1-4 (PP-2 score: damaging) | Actionable variants tier 1+2 (PP-2 score: damaging) | Variant                                                                         |
|-----------------|---------------------------------------------|-----------------------------------------------------|-----------------------------------------------------|---------------------------------------------------------------------------------|
| 1               | 566                                         | 9                                                   | 3                                                   | IDH2 R261H<br>IDH2 R131H<br>IDH2 R209H                                          |
| 2               | 592                                         | 2                                                   | 2                                                   | BRCA2 E394A<br>BRIP1 P47A                                                       |
| 3               | 537                                         | 1                                                   | 1                                                   | TP53 R141H                                                                      |
| 4               | 595                                         | 19                                                  | 6                                                   | PTEN Y155C<br>ROS1 G374A<br>ROS1 G365A<br>TP53 L17R<br>TP53 L198R<br>TP53 L330R |
| 5               | 557                                         | 9                                                   | 1                                                   | BARD1 R207C                                                                     |
| 6               | 629                                         | 7                                                   | 3                                                   | ALK R405H<br>ALK R1575H<br>ATM L89F                                             |
| 7               | 662                                         | 14                                                  | 5                                                   | ATM L89F<br>FGFR3 P449S<br>FGFR3 P450S<br>FGFR3 P451S<br>NF1 D109E              |
| 8               | 619                                         | 4                                                   | 0                                                   | /                                                                               |
| 9               | 555                                         | 10                                                  | 0                                                   | /                                                                               |
| 10              | 587                                         | 14                                                  | 4                                                   | ATM P1054R<br>PTEN Y27C<br>TP53 S127Y<br>TP53 S34Y                              |
| Mean            | 590                                         | 9                                                   | 3                                                   |                                                                                 |

Agreements between tumor- and cfDNA are marked in red

**Supplemental Table S15:** Tier 1+2 actionable variants in tumorDNA utilizing the COSMIC database. Analysis of actionable variants tier 1+2 detected in filtered SNVs (AF ≤ 1%; impact: moderate/high)

| Patient (tumorDNA) | Actionability gene | Variant                 | Specific variant/unspecified (according to COSMIC) | Treatment options (FDA approved) suggested by COSMIC | Actionability rank | Disease                                                                                |
|--------------------|--------------------|-------------------------|----------------------------------------------------|------------------------------------------------------|--------------------|----------------------------------------------------------------------------------------|
| 1                  | IDH2               | R261H<br>R131H<br>R209H | Unspecified                                        | Enasidenib                                           | 1                  | Haematopoietic and lymphoid tissue / haematopoietic neoplasm / acute myeloid leukaemia |
|                    | RAD51B             | T107K                   | Unspecified                                        | Olaparib                                             | 1                  | Prostate / carcinoma / NS                                                              |
|                    | TP53               | Y220N<br>S127N<br>Y88N  | Unspecified                                        | Gemcitabine + Nab-Paclitaxel                         | 3 (Phase 2)        | Pancreas / carcinoma / NS                                                              |
| 2                  | /                  | /                       | /                                                  | /                                                    | /                  | /                                                                                      |
| 3                  | TP53               | R141H                   | Unspecified                                        | Gemcitabine + Nab-Paclitaxel                         | 3 (Phase 2)        | Pancreas / carcinoma / NS                                                              |
| 4                  | ATM                | E2156D                  | Unspecified                                        | Olaparib                                             | 1                  | Prostate / carcinoma / NS                                                              |
|                    |                    |                         |                                                    | Olaparib + Selumetinib; Epcadostat + Pembrolizumab   | 3 (Phase 2)        | Pancreas / carcinoma / NS                                                              |
|                    |                    |                         |                                                    | Olaparib + Pembrolizumab                             | 3 (Phase 2)        | Pancreas / carcinoma / ductal carcinoma                                                |
|                    | PTEN               | Y155C                   | Unspecified                                        | MK2206                                               | 3 (Phase 2)        | Pancreas / carcinoma / ductal carcinoma                                                |
|                    | ROS1               | G374A<br>G365A          | Unspecified                                        | Crizotinib, Entrectinib                              | 1                  | Lung / carcinoma / non small cell carcinoma                                            |
|                    | TP53               | L17R<br>L198R<br>L330R  | Unspecified                                        | Gemcitabine + Nab-Paclitaxel                         | 3 (Phase 2)        | Pancreas / carcinoma / NS                                                              |

|    |        |                                                    |             |                                                      |             |                                         |
|----|--------|----------------------------------------------------|-------------|------------------------------------------------------|-------------|-----------------------------------------|
| 5  | BARD1  | R207C                                              | Unspecified | Olaparib                                             | 1           | Prostate / carcinoma / NS               |
|    |        |                                                    |             | Olaparib + Pembrolizumab                             | 3 (Phase 2) | pancreas / carcinoma / ductal carcinoma |
|    | TP53   | V125G<br>V86G<br>V218G                             | Unspecified | Gemcitabine + Nab-Paclitaxel                         | 3 (Phase 2) | Pancreas / carcinoma / NS               |
| 6  | RAD51B | T107K                                              | Unspecified | Olaparib                                             | 1           | Prostate / carcinoma / NS               |
| 7  | ATM    | L89F                                               | Unspecified | Olaparib                                             | 1           | Prostate / carcinoma / NS               |
|    |        |                                                    |             | Olaparib + Selumetinib; E-pacadostat + Pembrolizumab | 3 (Phase 2) | Pancreas / carcinoma / NS               |
|    |        |                                                    |             | Olaparib + Pembrolizumab                             | 3 (Phase 2) | Pancreas / carcinoma / ductal carcinoma |
|    | BRAF   | L319I                                              | Unspecified | /                                                    | /           | /                                       |
|    | CHEK2  | K373E<br>K117E<br>K344E<br>K152E<br>K416E<br>K282E | Unspecified | Olaparib                                             | 1           | Prostate / carcinoma / NS               |
|    |        |                                                    |             | Olaparib + Pembrolizumab                             | 3 (Phase 2) | Pancreas / carcinoma / ductal carcinoma |
|    | FGFR3  | P449S<br>P450S<br>P451S                            | Unspecified | /                                                    | /           | /                                       |
|    | NF1    | D109E                                              | Unspecified | /                                                    | /           | /                                       |
|    | RAD51B | T107K                                              | Unspecified | Olaparib                                             | 1           | Prostate / carcinoma / NS               |
| 8  | TP53   | V157F<br>V25F<br>V64F                              | Unspecified | Gemcitabine + Nab-Paclitaxel                         | 3 (Phase 2) | Pancreas / carcinoma / NS               |
|    |        |                                                    |             |                                                      |             |                                         |
| 9  | TP53   | Y163C<br>Y31C<br>Y70C                              | Unspecified | Gemcitabine + Nab-Paclitaxel                         | 3 (Phase 2) | Pancreas / carcinoma / NS               |
| 10 | ATM    | P1054R                                             | Unspecified | Olaparib                                             | 1           | Prostate / carcinoma / NS               |
|    |        |                                                    |             | Olaparib + Selumetinib; E-pacadostat + Pembrolizumab | 3 (Phase 2) | Pancreas / carcinoma / NS               |

|      |               |             |                                 |             |                                                    |
|------|---------------|-------------|---------------------------------|-------------|----------------------------------------------------|
|      |               |             | Olaparib +<br>Pembrolizumab     | 3 (Phase 2) | Pancreas /<br>carcinoma /<br>ductal car-<br>cinoma |
| PTEN | Y27C          | Unspecified | MK2206                          | 3 (Phase 2) | Pancreas /<br>carcinoma /<br>ductal car-<br>cinoma |
| TP53 | S127Y<br>S34Y | Unspecified | Gemcitabine +<br>Nab-Paclitaxel | 3 (Phase 2) | Pancreas /<br>carcinoma /<br>NS                    |

**Supplemental Table S16:** Tier 1+2 actionable variants in evDNA utilizing the COSMIC database. Analysis of actionable variants tier 1+2 detected in filtered SNVs (AF ≤ 1%; impact: moderate/high)

| Patient (evDNA) | Actionability gene | Variant                 | Specific variant/unspecified (according to COSMIC) | Treatment options (FDA approved) suggested by COSMIC | Actionability rank | Disease                                                                                                                                  |
|-----------------|--------------------|-------------------------|----------------------------------------------------|------------------------------------------------------|--------------------|------------------------------------------------------------------------------------------------------------------------------------------|
| 1               | IDH2               | R261H<br>R131H<br>R209H | Unspecified                                        | Enasidenib                                           | 1                  | Haematopoietic and lymphoid tissue / haematopoietic neoplasm / acute myeloid leukaemia                                                   |
| 2               | BRCA2              | E394A                   | Unspecified                                        | Olaparib                                             | 1                  | Pancreas / carcinoma / NS; breast / carcinoma / NS; fallopian tube / carcinoma / NS; ovary / carcinoma / NS; peritoneum / carcinoma / NS |
|                 |                    |                         |                                                    | Bevacizumab + chemotherapy + Olaparib                | 1                  | Fallopian tube / carcinoma / NS; ovary / carcinoma / NS; peritoneum / carcinoma / NS                                                     |
|                 |                    |                         |                                                    | Olaparib                                             | 1                  | Prostate / carcinoma / NS                                                                                                                |
|                 | BRIP1              | P47A                    | Unspecified                                        | Olaparib + Pembrolizumab                             | 3 (Phase 2)        | Pancreas / carcinoma / ductal carcinoma                                                                                                  |
|                 | BRAF               | L319I                   | Unspecified                                        | /                                                    | /                  | /                                                                                                                                        |
| 3               | TP53               | R141H                   | Unspecified                                        | Gemcitabine + Nab-Paclitaxel                         | 3 (Phase 2)        | Pancreas / carcinoma / NS                                                                                                                |
| 4               | BRAF               | L319I                   | Unspecified                                        | /                                                    | /                  | /                                                                                                                                        |



|    |       |                         |             |                                                      |             |                                             |
|----|-------|-------------------------|-------------|------------------------------------------------------|-------------|---------------------------------------------|
|    | PTEN  | Y155C                   | Unspecified | MK2206                                               | 3 (Phase 2) | Pancreas / carcinoma / ductal carcinoma     |
|    | ROS1  | G374A<br>G365A          | Unspecified | Crizotinib, Entrectinib                              | 1           | Lung / carcinoma / non small cell carcinoma |
|    | TP53  | L17R<br>L198R<br>L330R  | Unspecified | Gemcitabine + Nab-Paclitaxel                         | 3 (Phase 2) | Pancreas / carcinoma / NS                   |
|    |       |                         |             | Olaparib                                             | 1           | Prostate / carcinoma / NS                   |
| 5  | BARD1 | R207C                   | Unspecified | Olaparib + Pembrolizumab                             | 3 (Phase 2) | pancreas / carcinoma / ductal carcinoma     |
| 6  | /     | /                       | /           | /                                                    | /           | /                                           |
|    |       |                         |             | Olaparib                                             | 1           | Prostate / carcinoma / NS                   |
|    | ATM   | L89F                    | Unspecified | Olaparib + Selumetinib; E-pacadostat + Pembrolizumab | 3 (Phase 2) | Pancreas / carcinoma / NS                   |
| 7  |       |                         |             | Olaparib + Pembrolizumab                             | 3 (Phase 2) | Pancreas / carcinoma / ductal carcinoma     |
|    | FGFR3 | P449S<br>P450S<br>P451S | Unspecified | /                                                    | /           | /                                           |
|    | NF1   | D109E                   | Unspecified | /                                                    | /           | /                                           |
| 8  | /     | /                       | /           | /                                                    | /           | /                                           |
| 9  | BRAF  | L319I                   | Unspecified | /                                                    | /           | /                                           |
|    |       |                         |             | Olaparib                                             | 1           | Prostate / carcinoma / NS                   |
|    | ATM   | P1054R                  | Unspecified | Olaparib + Selumetinib; E-pacadostat + Pembrolizumab | 3 (Phase 2) | Pancreas / carcinoma / NS                   |
| 10 |       |                         |             | Olaparib + Pembrolizumab                             | 3 (Phase 2) | Pancreas / carcinoma / ductal carcinoma     |
|    | BRAF  | L319I                   | Unspecified | /                                                    | /           | /                                           |
|    | PTEN  | Y27C                    | Unspecified | MK2206                                               | 3 (Phase 2) | Pancreas / carcinoma / ductal carcinoma     |

|        |               |             |                              |             |                           |
|--------|---------------|-------------|------------------------------|-------------|---------------------------|
| RAD51B | T107K         | Unspecified | Olaparib                     | 1           | Prostate / carcinoma / NS |
| TP53   | S127Y<br>S34Y | Unspecified | Gemcitabine + Nab-Paclitaxel | 3 (Phase 2) | Pancreas / carcinoma / NS |

**Supplemental Table S17:** Tier 1+2 actionable variants in cfDNA utilizing the COSMIC database. Analysis of actionable variants tier 1+2 detected in filtered SNVs (AF ≤ 1%; impact: moderate/high)

| Patient (cfDNA) | Actionability gene | Variant                 | Specific variant/unspecified (according to COSMIC) | Treatment options (FDA approved) suggested by COSMIC | Actionability rank | Disease                                                                                                                                  |
|-----------------|--------------------|-------------------------|----------------------------------------------------|------------------------------------------------------|--------------------|------------------------------------------------------------------------------------------------------------------------------------------|
| 1               | IDH2               | R261H<br>R131H<br>R209H | Unspecified                                        | Enasidenib                                           | 1                  | Haematopoietic and lymphoid tissue / haematopoietic neoplasm / acute myeloid leukaemia                                                   |
| 2               | BRCA2              | E394A                   | Unspecified                                        | Olaparib                                             | 1                  | Pancreas / carcinoma / NS; breast / carcinoma / NS; fallopian tube / carcinoma / NS; ovary / carcinoma / NS; peritoneum / carcinoma / NS |
|                 |                    |                         |                                                    | Bevacizumab + chemotherapy + Olaparib                | 1                  | Fallopian tube / carcinoma / NS; ovary / carcinoma / NS; peritoneum / carcinoma / NS                                                     |
|                 |                    |                         |                                                    | Olaparib                                             | 1                  | Prostate / carcinoma / NS                                                                                                                |
|                 | BRIP1              | P47A                    | Unspecified                                        | Olaparib + Pembrolizumab                             | 3 (Phase 2)        | Pancreas / carcinoma / ductal carcinoma                                                                                                  |
| 3               | TP53               | R141H                   | Unspecified                                        | Gemcitabine + Nab-Paclitaxel                         | 3 (Phase 2)        | Pancreas / carcinoma / NS                                                                                                                |
| 4               | PTEN               | Y155C                   | Unspecified                                        | MK2206                                               | 3 (Phase 2)        | Pancreas / carcinoma / ductal carcinoma                                                                                                  |
|                 | ROS1               | G374A<br>G365A          | Unspecified                                        | Crizotinib, Entrectinib                              | 1                  | Lung / carcinoma / non small cell carcinoma                                                                                              |
|                 | TP53               | L17R<br>L198R<br>L330R  | Unspecified                                        | Gemcitabine + Nab-Paclitaxel                         | 3 (Phase 2)        | Pancreas / carcinoma / NS                                                                                                                |
| 5               | BARD1              | R207C                   | Unspecified                                        | Olaparib                                             | 1                  | Prostate / carcinoma / NS                                                                                                                |

|    |       |                         |             |                                                                                                                             |             |                                                |
|----|-------|-------------------------|-------------|-----------------------------------------------------------------------------------------------------------------------------|-------------|------------------------------------------------|
| 6  | ALK   | R405H<br>R1575          | Unspecified | Olaparib +<br>Pembrolizumab                                                                                                 | 3 (Phase 2) | pancreas / carcinoma /<br>ductal carcinoma     |
|    |       |                         |             | Crizotinib,<br>Brigatinib,<br>Alectinib,<br>Lorlatinib,<br>Ceritinib                                                        | 1           | lung / carcinoma / non<br>small cell carcinoma |
|    |       |                         |             | Ceritinib +<br>Gemcitabine;<br>Ceritinib +<br>Cisplatin +<br>Gemcitabine;<br>Ceritinib +<br>Gemcitabine +<br>Nab-paclitaxel | 3 (Phase 1) | pancreas / carcinoma / duc-<br>tal carcinoma   |
|    | ATM   | L89F                    | Unspecified | Olaparib                                                                                                                    | 1           | Prostate / carcinoma / NS                      |
|    |       |                         |             | Olaparib +<br>Selumetinib;<br>Epacadostat +<br>Pembrolizumab                                                                | 3 (Phase 2) | Pancreas / carcinoma / NS                      |
|    |       |                         |             | Olaparib +<br>Pembrolizumab                                                                                                 | 3 (Phase 2) | Pancreas / carcinoma / duc-<br>tal carcinoma   |
| 7  | ATM   | L89F                    | Unspecified | Olaparib                                                                                                                    | 1           | Prostate / carcinoma / NS                      |
|    |       |                         |             | Olaparib +<br>Selumetinib;<br>Epacadostat +<br>Pembrolizumab                                                                | 3 (Phase 2) | Pancreas / carcinoma / NS                      |
|    |       |                         |             | Olaparib +<br>Pembrolizumab                                                                                                 | 3 (Phase 2) | Pancreas / carcinoma / duc-<br>tal carcinoma   |
|    | FGFR3 | P449S<br>P450S<br>P451S | Unspecified | /                                                                                                                           | /           | /                                              |
|    | NF1   | D109E                   | Unspecified | /                                                                                                                           | /           | /                                              |
| 8  | /     | /                       | /           | /                                                                                                                           | /           | /                                              |
| 9  | /     | /                       | /           | /                                                                                                                           | /           | /                                              |
| 10 | ATM   | P1054<br>R              | Unspecified | Olaparib                                                                                                                    | 1           | Prostate / carcinoma / NS                      |
|    |       |                         |             | Olaparib +<br>Selumetinib;<br>Epacadostat +<br>Pembrolizumab                                                                | 3 (Phase 2) | Pancreas / carcinoma / NS                      |
|    |       |                         |             | Olaparib +<br>Pembrolizumab                                                                                                 | 3 (Phase 2) | Pancreas / carcinoma / duc-<br>tal carcinoma   |
|    | PTEN  | Y27C                    | Unspecified | MK2206                                                                                                                      | 3 (Phase 2) | Pancreas / carcinoma /                         |

|      |               |             |                                 |             |                           |
|------|---------------|-------------|---------------------------------|-------------|---------------------------|
|      |               |             |                                 |             | ductal carcinoma          |
| TP53 | S34Y<br>S127Y | Unspecified | Gemcitabine +<br>Nab-Paclitaxel | 3 (Phase 2) | Pancreas / carcinoma / NS |

**Supplemental Table S18:** Tier 1+2 actionable variants in indels of tumorDNA. Analysis of tier 1+2 actionable variants in indels of tumorDNA per patient.

| Patient<br>(tum-<br>orDNA) | Location                   | Al-<br>lele | Conse-<br>quence        | Impact        | Sym-<br>bol | Biotype           | Exon  | Intron | Protein<br>position |
|----------------------------|----------------------------|-------------|-------------------------|---------------|-------------|-------------------|-------|--------|---------------------|
| 1                          | 11:125505377-<br>125505377 | A           | Frameshift va-<br>riant | HIGH          | CHEK1       | Protein<br>coding | 6/11  | -      | 223                 |
|                            | 11:125505377-<br>125505377 | A           | Frameshift va-<br>riant | HIGH          | CHEK1       | Protein<br>coding | 6/12  | -      | 239                 |
|                            | 11:125505377-<br>125505377 | A           | Frameshift va-<br>riant | HIGH          | CHEK1       | Protein<br>coding | 7/14  | -      | 223                 |
|                            | 11:125505377-<br>125505377 | A           | Frameshift va-<br>riant | HIGH          | CHEK1       | Protein<br>coding | 7/13  | -      | 223                 |
|                            | 11:125505377-<br>125505377 | A           | Frameshift va-<br>riant | HIGH          | CHEK1       | Protein<br>coding | 6/13  | -      | 223                 |
|                            | 11:125505377-<br>125505377 | A           | Frameshift va-<br>riant | HIGH          | CHEK1       | Protein<br>coding | 5/6   | -      | 144                 |
|                            | 11:125505377-<br>125505377 | A           | Frameshift va-<br>riant | HIGH          | CHEK1       | Protein<br>coding | 7/12  | -      | 223                 |
|                            | 9:133759489-<br>133759492  | -           | Inframe dele-<br>tion   | MODE-<br>RATE | ABL1        | Protein<br>coding | 11/11 | -      | 605                 |
|                            | 9:133759489-<br>133759492  | -           | Inframe dele-<br>tion   | MODE-<br>RATE | ABL1        | Protein<br>coding | 11/11 | -      | 624                 |
| 3                          | 9:133759489-<br>133759492  | -           | Inframe dele-<br>tion   | MODE-<br>RATE | ABL1        | Protein<br>coding | 11/11 | -      | 605                 |
|                            | 9:133759489-<br>133759492  | -           | Inframe dele-<br>tion   | MODE-<br>RATE | ABL1        | Protein<br>coding | 11/11 | -      | 624                 |
| 4                          | 11:125505377-<br>125505377 | A           | Frameshift va-<br>riant | HIGH          | CHEK1       | Protein<br>coding | 6/11  | -      | 223                 |
|                            | 11:125505377-<br>125505377 | A           | Frameshift va-<br>riant | HIGH          | CHEK1       | Protein<br>coding | 6/12  | -      | 239                 |
|                            | 11:125505377-<br>125505377 | A           | Frameshift va-<br>riant | HIGH          | CHEK1       | Protein<br>coding | 7/14  | -      | 223                 |
|                            | 11:125505377-<br>125505377 | A           | Frameshift va-<br>riant | HIGH          | CHEK1       | Protein<br>coding | 7/13  | -      | 223                 |
|                            | 11:125505377-<br>125505377 | A           | Frameshift va-<br>riant | HIGH          | CHEK1       | Protein<br>coding | 6/13  | -      | 223                 |
|                            | 11:125505377-<br>125505377 | A           | Frameshift va-<br>riant | HIGH          | CHEK1       | Protein<br>coding | 5/6   | -      | 144                 |
|                            | 11:125505377-<br>125505377 | A           | Frameshift va-<br>riant | HIGH          | CHEK1       | Protein<br>coding | 7/12  | -      | 223                 |
|                            | 9:133759489-<br>133759492  | -           | Inframe dele-<br>tion   | MODE-<br>RATE | ABL1        | Protein<br>coding | 11/11 | -      | 605                 |
|                            | 9:133759489-<br>133759492  | -           | Inframe dele-<br>tion   | MODE-<br>RATE | ABL1        | Protein<br>coding | 11/11 | -      | 624                 |
| 5                          | 11:125505377-<br>125505377 | A           | Frameshift va-<br>riant | HIGH          | CHEK1       | Protein<br>coding | 6/11  | -      | 223                 |
|                            | 11:125505377-<br>125505377 | A           | Frameshift va-<br>riant | HIGH          | CHEK1       | Protein<br>coding | 6/12  | -      | 239                 |
|                            | 11:125505377-<br>125505377 | A           | Frameshift va-<br>riant | HIGH          | CHEK1       | Protein<br>coding | 7/14  | -      | 223                 |
|                            | 11:125505377-<br>125505377 | A           | Frameshift va-<br>riant | HIGH          | CHEK1       | Protein<br>coding | 7/13  | -      | 223                 |

|   |                        |   |                    |          |       |                |       |   |         |
|---|------------------------|---|--------------------|----------|-------|----------------|-------|---|---------|
| 6 | 11:125505377-125505377 | A | Frameshift variant | HIGH     | CHEK1 | Protein coding | 6/13  | - | 223     |
|   | 11:125505377-125505377 | A | Frameshift variant | HIGH     | CHEK1 | Protein coding | 5/6   | - | 144     |
|   | 11:125505377-125505377 | A | Frameshift variant | HIGH     | CHEK1 | Protein coding | 7/12  | - | 223     |
|   | 17:7578221-7578223     | - | Frameshift variant | HIGH     | TP53  | Protein coding | 6/11  | - | 209     |
|   | 17:7578221-7578223     | - | Frameshift variant | HIGH     | TP53  | Protein coding | 5/9   | - | 209     |
|   | 17:7578221-7578223     | - | Frameshift variant | HIGH     | TP53  | Protein coding | 5/7   | - | 209     |
|   | 17:7578221-7578223     | - | Frameshift variant | HIGH     | TP53  | Protein coding | 6/12  | - | 209     |
|   | 17:7578221-7578223     | - | Frameshift variant | HIGH     | TP53  | Protein coding | 6/11  | - | 209     |
|   | 17:7578221-7578223     | - | Frameshift variant | HIGH     | TP53  | Protein coding | 6/12  | - | 209     |
|   | 17:7578221-7578223     | - | Frameshift variant | HIGH     | TP53  | Protein coding | 3/6   | - | 77      |
|   | 17:7578221-7578223     | - | Frameshift variant | HIGH     | TP53  | Protein coding | 5/6   | - | 116     |
|   | 9:133759489-133759492  | - | Inframe deletion   | MODERATE | ABL1  | Protein coding | 11/11 | - | 605     |
| 7 | 9:133759489-133759492  | - | Inframe deletion   | MODERATE | ABL1  | Protein coding | 11/11 | - | 624     |
|   | 8:38285913-38285916    | - | Inframe deletion   | MODERATE | FGFR1 | Protein coding | 3/17  | - | 43-44   |
|   | 8:38285913-38285916    | - | Inframe deletion   | MODERATE | FGFR1 | Protein coding | 5/19  | - | 124-125 |
|   | 8:38285913-38285916    | - | Inframe deletion   | MODERATE | FGFR1 | Protein coding | 4/18  | - | 135-136 |
|   | 8:38285913-38285916    | - | Inframe deletion   | MODERATE | FGFR1 | Protein coding | 4/18  | - | 132-133 |
|   | 8:38285913-38285916    | - | Inframe deletion   | MODERATE | FGFR1 | Protein coding | 2/16  | - | 43-44   |
|   | 8:38285913-38285916    | - | Inframe deletion   | MODERATE | FGFR1 | Protein coding | 5/19  | - | 132-133 |
|   | 8:38285913-38285916    | - | Inframe deletion   | MODERATE | FGFR1 | Protein coding | 5/19  | - | 165-166 |
|   | 8:38285913-38285916    | - | Inframe deletion   | MODERATE | FGFR1 | Protein coding | 4/4   | - | 43-44   |
|   | 8:38285913-38285916    | - | Inframe deletion   | MODERATE | FGFR1 | Protein coding | 4/7   | - | 132-133 |
|   | 8:38285913-38285916    | - | Inframe deletion   | MODERATE | FGFR1 | Protein coding | 3/5   | - | 43-44   |
|   | 8:38285913-38285916    | - | Inframe deletion   | MODERATE | FGFR1 | Protein coding | 3/4   | - | 43-44   |
|   | 9:133759489-133759492  | - | Inframe deletion   | MODERATE | ABL1  | Protein coding | 11/11 | - | 605     |
|   | 9:133759489-133759492  | - | Inframe deletion   | MODERATE | ABL1  | Protein coding | 11/11 | - | 624     |

|    |                       |   |                    |          |       |                |       |   |         |
|----|-----------------------|---|--------------------|----------|-------|----------------|-------|---|---------|
| 8  | 17:7579470-7579470    | G | Frameshift variant | HIGH     | TP53  | Protein coding | 4/11  | - | 72-73   |
|    | 17:7579470-7579470    | G | Frameshift variant | HIGH     | TP53  | Protein coding | 3/9   | - | 72-73   |
|    | 17:7579470-7579470    | G | Frameshift variant | HIGH     | TP53  | Protein coding | 3/7   | - | 72-73   |
|    | 17:7579470-7579470    | G | Frameshift variant | HIGH     | TP53  | Protein coding | 4/12  | - | 72-73   |
|    | 17:7579470-7579470    | G | Frameshift variant | HIGH     | TP53  | Protein coding | 5/6   | - | 72-73   |
|    | 17:7579470-7579470    | G | Frameshift variant | HIGH     | TP53  | Protein coding | 4/5   | - | 72-73   |
|    | 8:38285913-38285916   | - | Inframe deletion   | MODERATE | FGFR1 | Protein coding | 3/17  | - | 43-44   |
|    | 8:38285913-38285916   | - | Inframe deletion   | MODERATE | FGFR1 | Protein coding | 5/19  | - | 124-125 |
|    | 8:38285913-38285916   | - | Inframe deletion   | MODERATE | FGFR1 | Protein coding | 4/18  | - | 135-136 |
|    | 8:38285913-38285916   | - | Inframe deletion   | MODERATE | FGFR1 | Protein coding | 4/18  | - | 132-133 |
|    | 8:38285913-38285916   | - | Inframe deletion   | MODERATE | FGFR1 | Protein coding | 2/16  | - | 43-44   |
|    | 8:38285913-38285916   | - | Inframe deletion   | MODERATE | FGFR1 | Protein coding | 5/19  | - | 132-133 |
|    | 8:38285913-38285916   | - | Inframe deletion   | MODERATE | FGFR1 | Protein coding | 5/19  | - | 165-166 |
|    | 8:38285913-38285916   | - | Inframe deletion   | MODERATE | FGFR1 | Protein coding | 4/4   | - | 43-44   |
|    | 8:38285913-38285916   | - | Inframe deletion   | MODERATE | FGFR1 | Protein coding | 4/7   | - | 132-133 |
| 9  | 9:133759489-133759492 | - | Inframe deletion   | MODERATE | ABL1  | Protein coding | 11/11 | - | 605     |
|    | 9:133759489-133759492 | - | Inframe deletion   | MODERATE | ABL1  | Protein coding | 11/11 | - | 624     |
| 10 | 9:133759489-133759492 | - | Inframe deletion   | MODERATE | ABL1  | Protein coding | 11/11 | - | 605     |
|    | 9:133759489-133759492 | - | Inframe deletion   | MODERATE | ABL1  | Protein coding | 11/11 | - | 624     |

Agreements between ev- and tumorDNA are marked in blue and agreements between cf- and tumorDNA are marked in red; overlappings in the agreement of ev- and cf- with tumorDNA are marked in violet



**Supplemental Table S19:** Tier 1+2 actionable variants in indels of evDNA. Analysis of tier 1+2 actionable variants in indels of evDNA per patient.

| Patient (evDNA) | Location               | Al-<br>lele | Conse-<br>quence                                                                | Impact        | Sym-<br>bol | Biotype                       | Exon  | Intron | Protein<br>position |
|-----------------|------------------------|-------------|---------------------------------------------------------------------------------|---------------|-------------|-------------------------------|-------|--------|---------------------|
| 1               | -                      | -           | -                                                                               | -             | -           | -                             | -     | -      | -                   |
| 3               | 9:133759489-133759492  | -           | Inframe dele-<br>tion                                                           | MODE-<br>RATE | ABL1        | Protein<br>coding             | 11/11 | -      | 605                 |
|                 | 9:133759489-133759492  | -           | Inframe dele-<br>tion                                                           | MODE-<br>RATE | ABL1        | Protein<br>coding             | 11/11 | -      | 624                 |
| 4               | 11:125505377-125505377 | A           | Frameshift va-<br>riant                                                         | HIGH          | CHEK1       | Protein<br>coding             | 6/11  | -      | 223                 |
|                 | 11:125505377-125505377 | A           | Frameshift va-<br>riant                                                         | HIGH          | CHEK1       | Protein<br>coding             | 6/12  | -      | 239                 |
|                 | 11:125505377-125505377 | A           | Frameshift va-<br>riant                                                         | HIGH          | CHEK1       | Protein<br>coding             | 7/14  | -      | 223                 |
|                 | 11:125505377-125505377 | A           | Frameshift va-<br>riant                                                         | HIGH          | CHEK1       | Protein<br>coding             | 7/13  | -      | 223                 |
|                 | 11:125505377-125505377 | A           | Frameshift va-<br>riant                                                         | HIGH          | CHEK1       | Protein<br>coding             | 6/13  | -      | 223                 |
|                 | 11:125505377-125505377 | A           | Frameshift va-<br>riant                                                         | HIGH          | CHEK1       | Protein<br>coding             | 5/6   | -      | 144                 |
|                 | 11:125505377-125505377 | A           | Frameshift va-<br>riant                                                         | HIGH          | CHEK1       | Protein<br>coding             | 7/12  | -      | 223                 |
|                 | 8:38320386-38320688    | -           | Splice donor<br>variant, 5<br>prime UTR<br>variant, intron<br>variant           | HIGH          | FGFR1       | Protein<br>coding             | 1/2   | 1/1    | -                   |
|                 | 9:133759489-133759492  | -           | Inframe dele-<br>tion                                                           | MODE-<br>RATE | ABL1        | Protein<br>coding             | 11/11 | -      | 605                 |
|                 | 9:133759489-133759492  | -           | Inframe dele-<br>tion                                                           | MODE-<br>RATE | ABL1        | Protein<br>coding             | 11/11 | -      | 624                 |
| 5               | 9:133759489-133759492  | -           | Inframe dele-<br>tion                                                           | MODE-<br>RATE | ABL1        | Protein<br>coding             | 11/11 | -      | 605                 |
|                 | 9:133759489-133759492  | -           | Inframe dele-<br>tion                                                           | MODE-<br>RATE | ABL1        | Protein<br>coding             | 11/11 | -      | 624                 |
| 6               | 14:68331716-68331718   | -           | Splice accep-<br>tor variant, in-<br>tron variant                               | HIGH          | RAD51<br>B  | Protein<br>coding             | -     | 3/9    | -                   |
|                 | 14:68331716-68331718   | -           | Splice accep-<br>tor variant, in-<br>tron variant                               | HIGH          | RAD51<br>B  | Protein<br>coding             | -     | 4/10   | -                   |
|                 | 14:68331716-68331718   | -           | Splice accep-<br>tor variant,<br>intron variant,<br>NMD tran-<br>script variant | HIGH          | RAD51<br>B  | Nonsense<br>mediated<br>decay | -     | 5/11   | -                   |
|                 | 14:68331716-68331718   | -           | Splice accep-<br>tor variant, in-<br>tron variant                               | HIGH          | RAD51<br>B  | Protein<br>coding             | -     | 4/4    | -                   |
|                 | 14:68331716-68331718   | -           | Splice accep-<br>tor variant, in-<br>tron variant                               | HIGH          | RAD51<br>B  | Protein<br>coding             | -     | 4/11   | -                   |

|    |                       |   |                                                                        |           |         |                      |       |     |     |
|----|-----------------------|---|------------------------------------------------------------------------|-----------|---------|----------------------|-------|-----|-----|
|    | 14:68331716-68331718  | - | Splice acceptor variant, intron variant, non-coding transcript variant | HIGH      | RAD51 B | Processed transcript | -     | 1/3 | -   |
|    | 14:68331716-68331718  | - | Splice acceptor variant, intron variant, non-coding transcript variant | HIGH      | RAD51 B | Processed transcript | -     | 1/3 | -   |
|    | 17:7578221-7578223    | - | Frameshift variant                                                     | HIGH      | TP53    | Protein coding       | 6/11  | -   | 209 |
|    | 17:7578221-7578223    | - | Frameshift variant                                                     | HIGH      | TP53    | Protein coding       | 5/9   | -   | 209 |
|    | 17:7578221-7578223    | - | Frameshift variant                                                     | HIGH      | TP53    | Protein coding       | 5/7   | -   | 209 |
|    | 17:7578221-7578223    | - | Frameshift variant                                                     | HIGH      | TP53    | Protein coding       | 6/12  | -   | 209 |
|    | 17:7578221-7578223    | - | Frameshift variant                                                     | HIGH      | TP53    | Protein coding       | 6/11  | -   | 209 |
|    | 17:7578221-7578223    | - | Frameshift variant                                                     | HIGH      | TP53    | Protein coding       | 3/6   | -   | 77  |
|    | 17:7578221-7578223    | - | Frameshift variant                                                     | HIGH      | TP53    | Protein coding       | 5/6   | -   | 116 |
| 7  | 9:133759489-133759492 | - | Inframe deletion                                                       | MODE-RATE | ABL1    | Protein coding       | 11/11 | -   | 605 |
|    | 9:133759489-133759492 | - | Inframe deletion                                                       | MODE-RATE | ABL1    | Protein coding       | 11/11 | -   | 624 |
| 8  | -                     | - | -                                                                      | -         | -       | -                    | -     | -   | -   |
| 9  | 9:133759489-133759492 | - | Inframe deletion                                                       | MODE-RATE | ABL1    | Protein coding       | 11/11 | -   | 605 |
|    | 9:133759489-133759492 | - | Inframe deletion                                                       | MODE-RATE | ABL1    | Protein coding       | 11/11 | -   | 624 |
| 10 | -                     | - | -                                                                      | -         | -       | -                    | -     | -   | -   |

Agreements between ev- and tumorDNA are marked in blue

**Supplemental Table S20:** Tier 1+2 actionable variants in indels of cfDNA. Analysis of tier 1+2 actionable variants in indels of cfDNA per patient.

| Patient (cfDNA) | Location               | Allele | Consequence        | Impact | Symbol | Biotype        | Exon | Intron | Protein position |
|-----------------|------------------------|--------|--------------------|--------|--------|----------------|------|--------|------------------|
| 1               | 11:125505377-125505377 | A      | Frameshift variant | HIGH   | CHEK1  | Protein coding | 6/11 | -      | 223              |
|                 | 11:125505377-125505377 | A      | Frameshift variant | HIGH   | CHEK1  | Protein coding | 6/12 | -      | 239              |
|                 | 11:125505377-125505377 | A      | Frameshift variant | HIGH   | CHEK1  | Protein coding | 7/14 | -      | 223              |
|                 | 11:125505377-125505377 | A      | Frameshift variant | HIGH   | CHEK1  | Protein coding | 7/13 | -      | 223              |
|                 | 11:125505377-125505377 | A      | Frameshift variant | HIGH   | CHEK1  | Protein coding | 6/13 | -      | 223              |
|                 | 11:125505377-125505377 | A      | Frameshift variant | HIGH   | CHEK1  | Protein coding | 5/6  | -      | 144              |
|                 | 11:125505377-125505377 | A      | Frameshift variant | HIGH   | CHEK1  | Protein coding | 7/12 | -      | 223              |
| 3               | -                      | -      | -                  | -      | -      | -              | -    | -      | -                |
| 4               | 11:125505377-125505377 | A      | Frameshift variant | HIGH   | CHEK1  | Protein coding | 6/11 | -      | 223              |
|                 | 11:125505377-125505377 | A      | Frameshift variant | HIGH   | CHEK1  | Protein coding | 6/12 | -      | 239              |
|                 | 11:125505377-125505377 | A      | Frameshift variant | HIGH   | CHEK1  | Protein coding | 7/14 | -      | 223              |
|                 | 11:125505377-125505377 | A      | Frameshift variant | HIGH   | CHEK1  | Protein coding | 7/13 | -      | 223              |
|                 | 11:125505377-125505377 | A      | Frameshift variant | HIGH   | CHEK1  | Protein coding | 6/13 | -      | 223              |
|                 | 11:125505377-125505377 | A      | Frameshift variant | HIGH   | CHEK1  | Protein coding | 5/6  | -      | 144              |
|                 | 11:125505377-125505377 | A      | Frameshift variant | HIGH   | CHEK1  | Protein coding | 7/12 | -      | 223              |
| 5               | 11:125505377-125505377 | A      | Frameshift variant | HIGH   | CHEK1  | Protein coding | 6/11 | -      | 223              |
|                 | 11:125505377-125505377 | A      | Frameshift variant | HIGH   | CHEK1  | Protein coding | 6/12 | -      | 239              |
|                 | 11:125505377-125505377 | A      | Frameshift variant | HIGH   | CHEK1  | Protein coding | 7/14 | -      | 223              |
|                 | 11:125505377-125505377 | A      | Frameshift variant | HIGH   | CHEK1  | Protein coding | 7/13 | -      | 223              |
|                 | 11:125505377-125505377 | A      | Frameshift variant | HIGH   | CHEK1  | Protein coding | 6/13 | -      | 223              |
|                 | 11:125505377-125505377 | A      | Frameshift variant | HIGH   | CHEK1  | Protein coding | 5/6  | -      | 144              |
|                 | 11:125505377-125505377 | A      | Frameshift variant | HIGH   | CHEK1  | Protein coding | 7/12 | -      | 223              |
| 6               | 11:125505377-125505377 | A      | Frameshift variant | HIGH   | CHEK1  | Protein coding | 6/11 | -      | 223              |
|                 | 11:125505377-125505377 | A      | Frameshift variant | HIGH   | CHEK1  | Protein coding | 6/12 | -      | 239              |
|                 | 11:125505377-125505377 | A      | Frameshift variant | HIGH   | CHEK1  | Protein coding | 7/14 | -      | 223              |

|   |                        |   |                    |           |       |                |       |   |         |
|---|------------------------|---|--------------------|-----------|-------|----------------|-------|---|---------|
|   | 11:125505377-125505377 | A | Frameshift variant | HIGH      | CHEK1 | Protein coding | 7/13  | - | 223     |
|   | 11:125505377-125505377 | A | Frameshift variant | HIGH      | CHEK1 | Protein coding | 6/13  | - | 223     |
|   | 11:125505377-125505377 | A | Frameshift variant | HIGH      | CHEK1 | Protein coding | 5/6   | - | 144     |
|   | 11:125505377-125505377 | A | Frameshift variant | HIGH      | CHEK1 | Protein coding | 7/13  | - | 223     |
|   | 11:125505377-125505377 | A | Frameshift variant | HIGH      | CHEK1 | Protein coding | 7/12  | - | 223     |
|   | 8:38285913-38285916    | - | Inframe deletion   | MODE-RATE | FGFR1 | Protein coding | 3/17  | - | 43-44   |
|   | 8:38285913-38285916    | - | Inframe deletion   | MODE-RATE | FGFR1 | Protein coding | 5/19  | - | 124-125 |
|   | 8:38285913-38285916    | - | Inframe deletion   | MODE-RATE | FGFR1 | Protein coding | 4/18  | - | 135-136 |
|   | 8:38285913-38285916    | - | Inframe deletion   | MODE-RATE | FGFR1 | Protein coding | 4/18  | - | 132-133 |
|   | 8:38285913-38285916    | - | Inframe deletion   | MODE-RATE | FGFR1 | Protein coding | 2/16  | - | 43-44   |
|   | 8:38285913-38285916    | - | Inframe deletion   | MODE-RATE | FGFR1 | Protein coding | 5/19  | - | 132-133 |
|   | 8:38285913-38285916    | - | Inframe deletion   | MODE-RATE | FGFR1 | Protein coding | 4/18  | - | 132-133 |
|   | 8:38285913-38285916    | - | Inframe deletion   | MODE-RATE | FGFR1 | Protein coding | 5/19  | - | 165-166 |
|   | 8:38285913-38285916    | - | Inframe deletion   | MODE-RATE | FGFR1 | Protein coding | 4/4   | - | 43-44   |
|   | 8:38285913-38285916    | - | Inframe deletion   | MODE-RATE | FGFR1 | Protein coding | 4/7   | - | 132-133 |
|   | 8:38285913-38285916    | - | Inframe deletion   | MODE-RATE | FGFR1 | Protein coding | 3/5   | - | 43-44   |
|   | 8:38285913-38285916    | - | Inframe deletion   | MODE-RATE | FGFR1 | Protein coding | 3/4   | - | 43-44   |
| 7 | 9:133759489-133759492  | - | Inframe deletion   | MODE-RATE | ABL1  | Protein coding | 11/11 | - | 605     |
|   | 9:133759489-133759492  | - | Inframe deletion   | MODE-RATE | ABL1  | Protein coding | 11/11 | - | 624     |
| 8 | 11:125505377-125505377 | A | Frameshift variant | HIGH      | CHEK1 | Protein coding | 6/11  | - | 223     |
|   | 11:125505377-125505377 | A | Frameshift variant | HIGH      | CHEK1 | Protein coding | 6/12  | - | 239     |
|   | 11:125505377-125505377 | A | Frameshift variant | HIGH      | CHEK1 | Protein coding | 7/14  | - | 223     |
|   | 11:125505377-125505377 | A | Frameshift variant | HIGH      | CHEK1 | Protein coding | 7/13  | - | 223     |
|   | 11:125505377-125505377 | A | Frameshift variant | HIGH      | CHEK1 | Protein coding | 6/13  | - | 223     |
|   | 11:125505377-125505377 | A | Frameshift variant | HIGH      | CHEK1 | Protein coding | 5/6   | - | 144     |
|   | 11:125505377-125505377 | A | Frameshift variant | HIGH      | CHEK1 | Protein coding | 7/12  | - | 223     |

|    |                        |   |                                         |           |         |                |       |      |         |
|----|------------------------|---|-----------------------------------------|-----------|---------|----------------|-------|------|---------|
| 9  | 9:133759489-133759492  | A | Inframe deletion                        | MODE-RATE | ABL1    | Protein coding | 11/11 | -    | 605     |
|    | 9:133759489-133759492  | A | Inframe deletion                        | MODE-RATE | ABL1    | Protein coding | 11/11 | -    | 624     |
|    | 8:38285913-38285916    | - | Inframe deletion                        | MODE-RATE | FGFR1   | Protein coding | 3/17  | -    | 43-44   |
|    | 8:38285913-38285916    | - | Inframe deletion                        | MODE-RATE | FGFR1   | Protein coding | 5/19  | -    | 124-125 |
|    | 8:38285913-38285916    | - | Inframe deletion                        | MODE-RATE | FGFR1   | Protein coding | 4/18  | -    | 135-136 |
|    | 8:38285913-38285916    | - | Inframe deletion                        | MODE-RATE | FGFR1   | Protein coding | 4/18  | -    | 132-133 |
|    | 8:38285913-38285916    | - | Inframe deletion                        | MODE-RATE | FGFR1   | Protein coding | 2/16  | -    | 43-44   |
|    | 8:38285913-38285916    | - | Inframe deletion                        | MODE-RATE | FGFR1   | Protein coding | 5/19  | -    | 132-133 |
|    | 8:38285913-38285916    | - | Inframe deletion                        | MODE-RATE | FGFR1   | Protein coding | 5/19  | -    | 165-166 |
|    | 8:38285913-38285916    | - | Inframe deletion                        | MODE-RATE | FGFR1   | Protein coding | 4/4   | -    | 43-44   |
|    | 8:38285913-38285916    | - | Inframe deletion                        | MODE-RATE | FGFR1   | Protein coding | 4/7   | -    | 132-133 |
|    | 8:38285913-38285916    | - | Inframe deletion                        | MODE-RATE | FGFR1   | Protein coding | 3/5   | -    | 43-44   |
|    | 8:38285913-38285916    | - | Inframe deletion                        | MODE-RATE | FGFR1   | Protein coding | 3/4   | -    | 43-44   |
|    | 8:38285913-38285916    | - | Inframe deletion                        | MODE-RATE | FGFR1   | Protein coding | 4/18  | -    | 132-133 |
|    | 9:133759489-133759492  | - | Inframe deletion                        | MODE-RATE | ABL1    | Protein coding | 11/11 | -    | 605     |
|    | 9:133759489-133759492  | - | Inframe deletion                        | MODE-RATE | ABL1    | Protein coding | 11/11 | -    | 624     |
| 10 | 11:125505377-125505377 | A | Frameshift variant                      | HIGH      | CHEK1   | Protein coding | 6/11  | -    | 223     |
|    | 11:125505377-125505377 | A | Frameshift variant                      | HIGH      | CHEK1   | Protein coding | 6/12  | -    | 239     |
|    | 11:125505377-125505377 | A | Frameshift variant                      | HIGH      | CHEK1   | Protein coding | 7/14  | -    | 223     |
|    | 11:125505377-125505377 | A | Frameshift variant                      | HIGH      | CHEK1   | Protein coding | 7/13  | -    | 223     |
|    | 11:125505377-125505377 | A | Frameshift variant                      | HIGH      | CHEK1   | Protein coding | 6/13  | -    | 223     |
|    | 11:125505377-125505377 | A | Frameshift variant                      | HIGH      | CHEK1   | Protein coding | 5/6   | -    | 144     |
|    | 11:125505377-125505377 | A | Frameshift variant                      | HIGH      | CHEK1   | Protein coding | 7/12  | -    | 223     |
|    | 14:68331715-68331719   | - | Splice acceptor variant, intron variant | HIGH      | RAD51 B | Protein coding | -     | 3/9  | -       |
|    | 14:68331715-68331719   | - | Splice acceptor variant, intron variant | HIGH      | RAD51 B | Protein coding | -     | 4/10 | -       |

|                      |   |                                                                        |      |         |                         |   |      |   |
|----------------------|---|------------------------------------------------------------------------|------|---------|-------------------------|---|------|---|
| 14:68331715-68331719 | - | Splice acceptor variant, intron variant, NMD transcript variant        | HIGH | RAD51 B | Nonsense mediated decay | - | 5/11 | - |
| 14:68331715-68331719 | - | Splice acceptor variant, intron variant                                | HIGH | RAD51 B | Protein coding          | - | 4/4  | - |
| 14:68331715-68331719 | - | Splice acceptor variant, intron variant                                | HIGH | RAD51 B | Protein coding          | - | 4/11 | - |
| 14:68331715-68331719 | - | Splice acceptor variant, intron variant, non-coding transcript variant | HIGH | RAD51 B | Processed transcript    | - | 1/3  | - |

Agreements between cf- and tumorDNA are marked in red

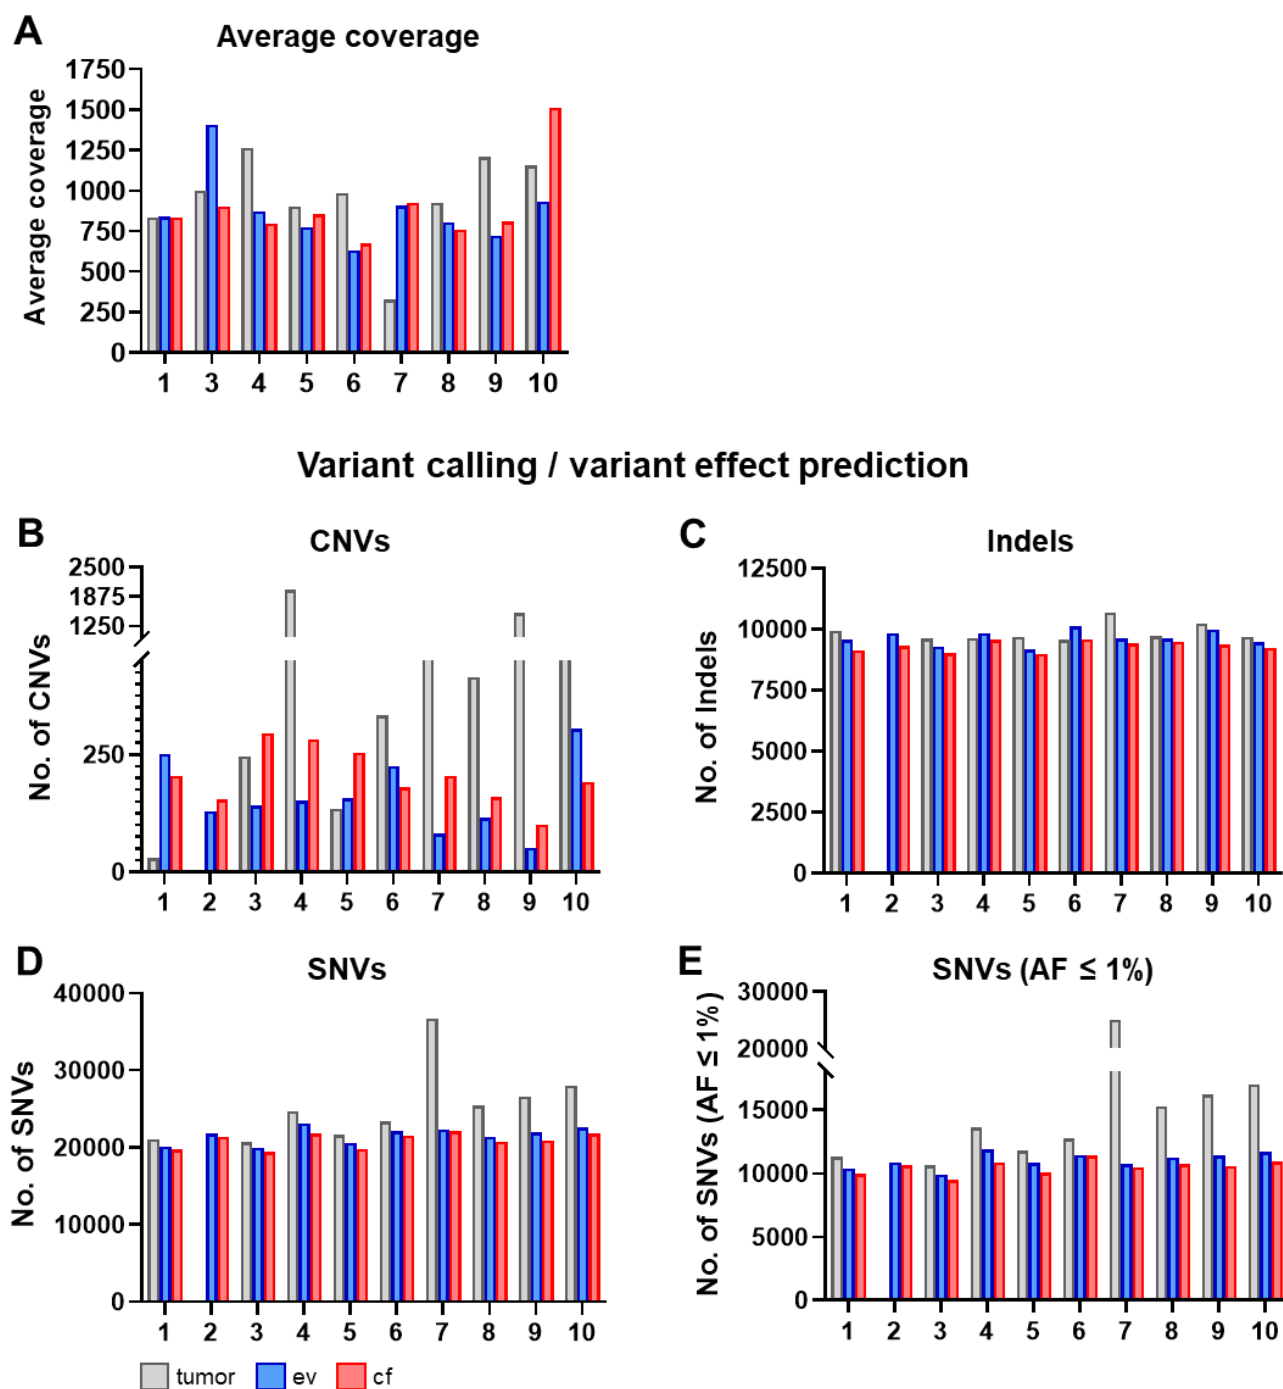

**Supplemental Figure S1:** Coverage and variant calling. (A) Average coverage per patient. Number of called variants of (B) CNVs (by CeGaT) and of detected variants (VEP, Ensembl) of (C) Indels; (D) unfiltered SNVs as well as (E) filtered SNVs (AF ≤ 1%) per patient.

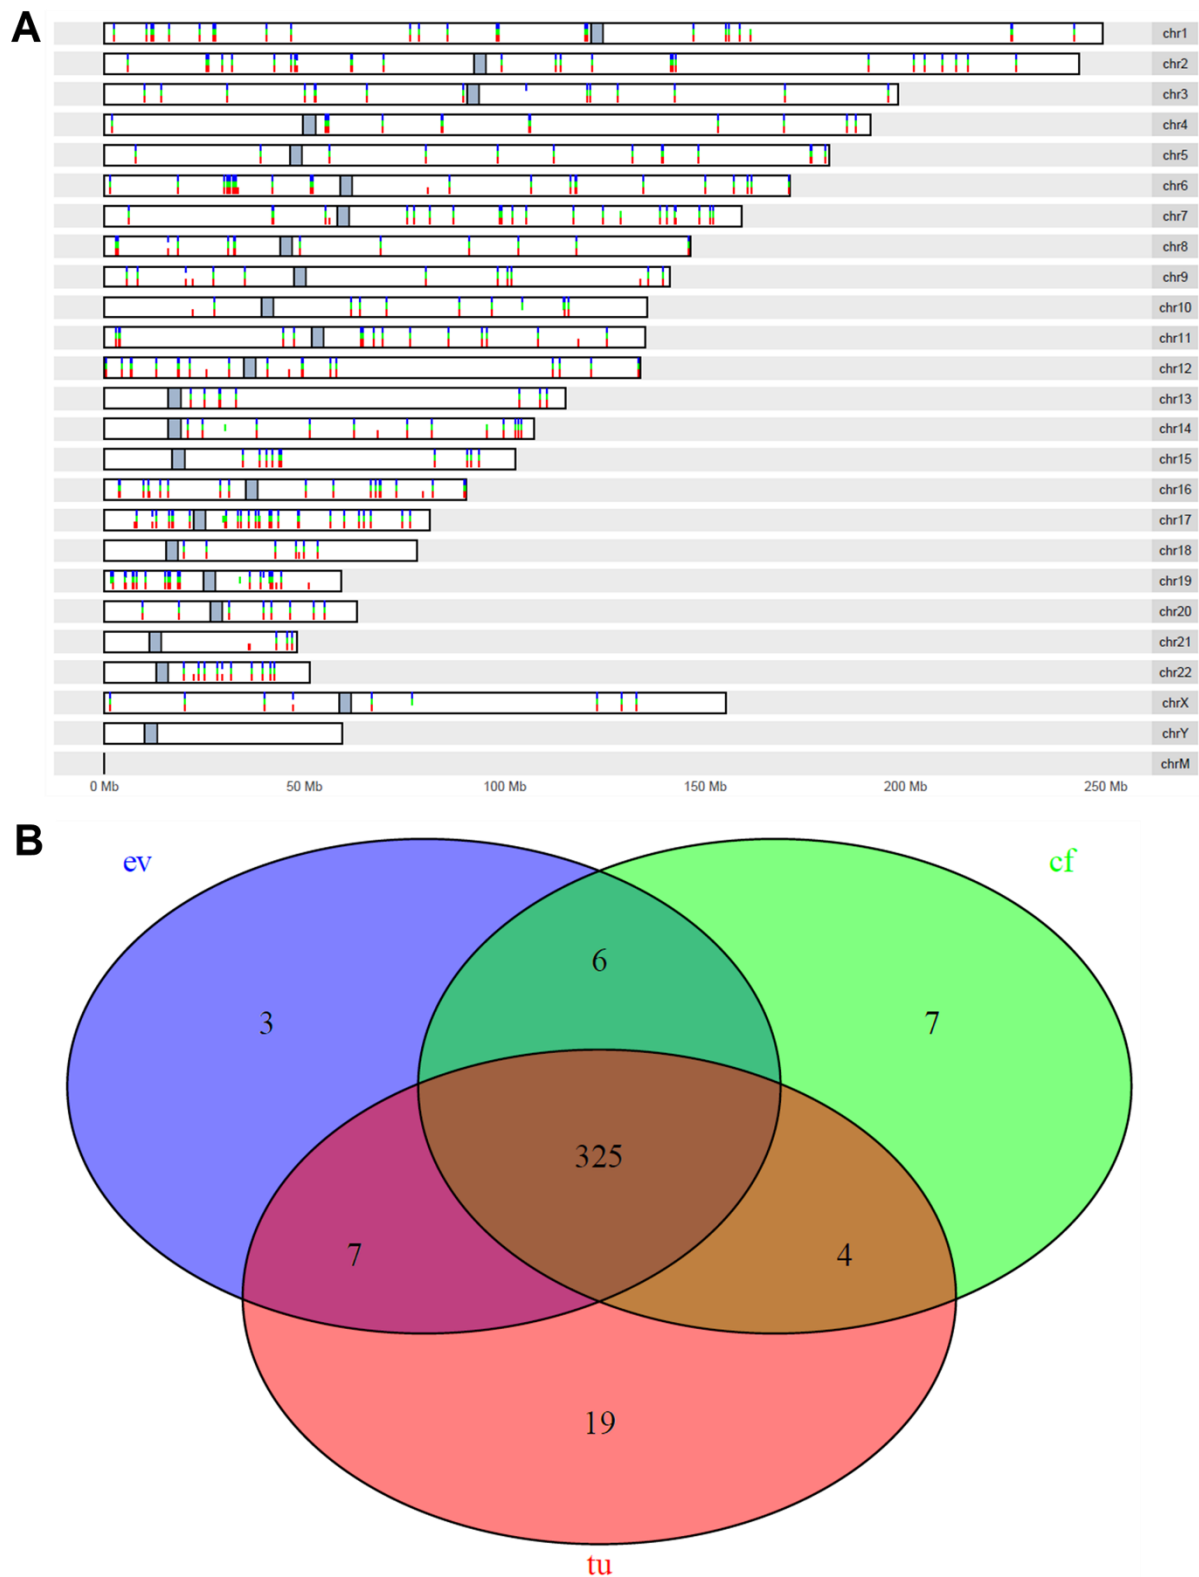

**Supplemental Figure S2:** Chromosomal positions of SNVs for patient 1. (A) Ideogram showing chromosomal locations of SNV variants and (B) Venn diagram indicating overlapping chromosomal positions for tumor- (red), ev- (blue) and cfDNA (green).



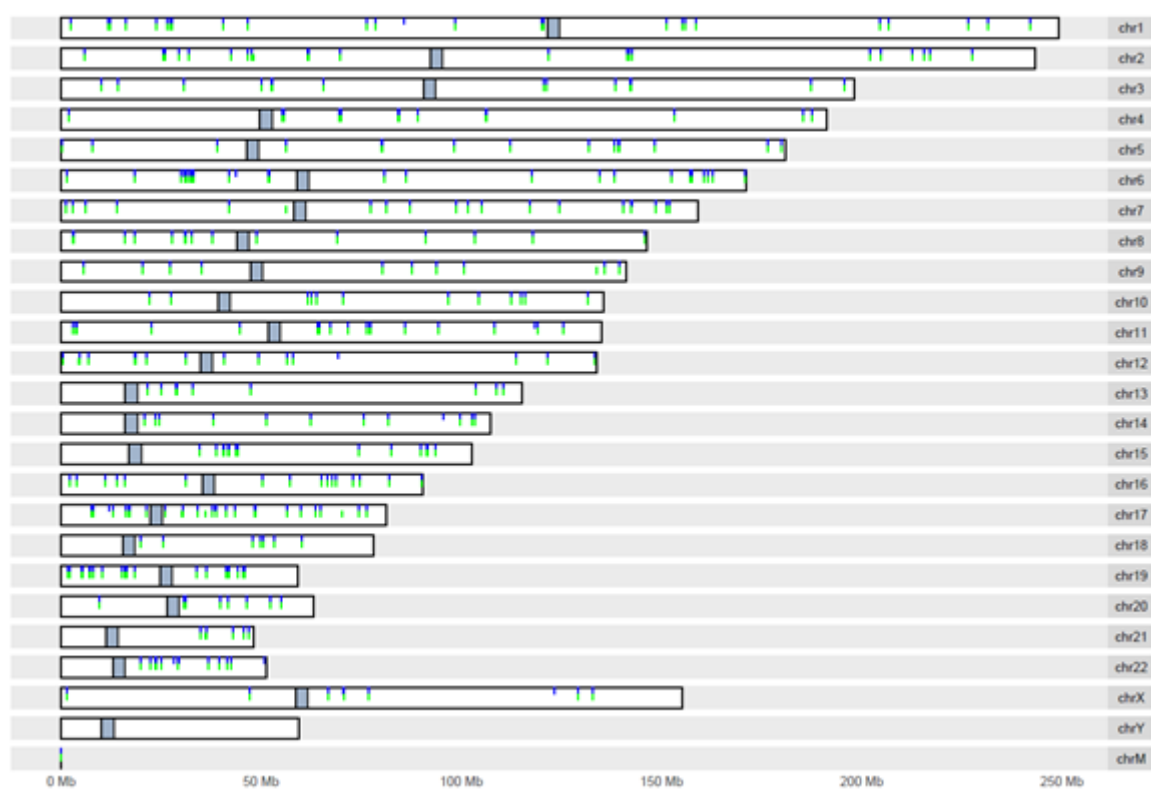

**Supplemental Figure S3:** Chromosomal positions of SNVs for patient 2. Ideogram showing chromosomal locations of SNV variants for ev- (blue) and cfDNA (green).

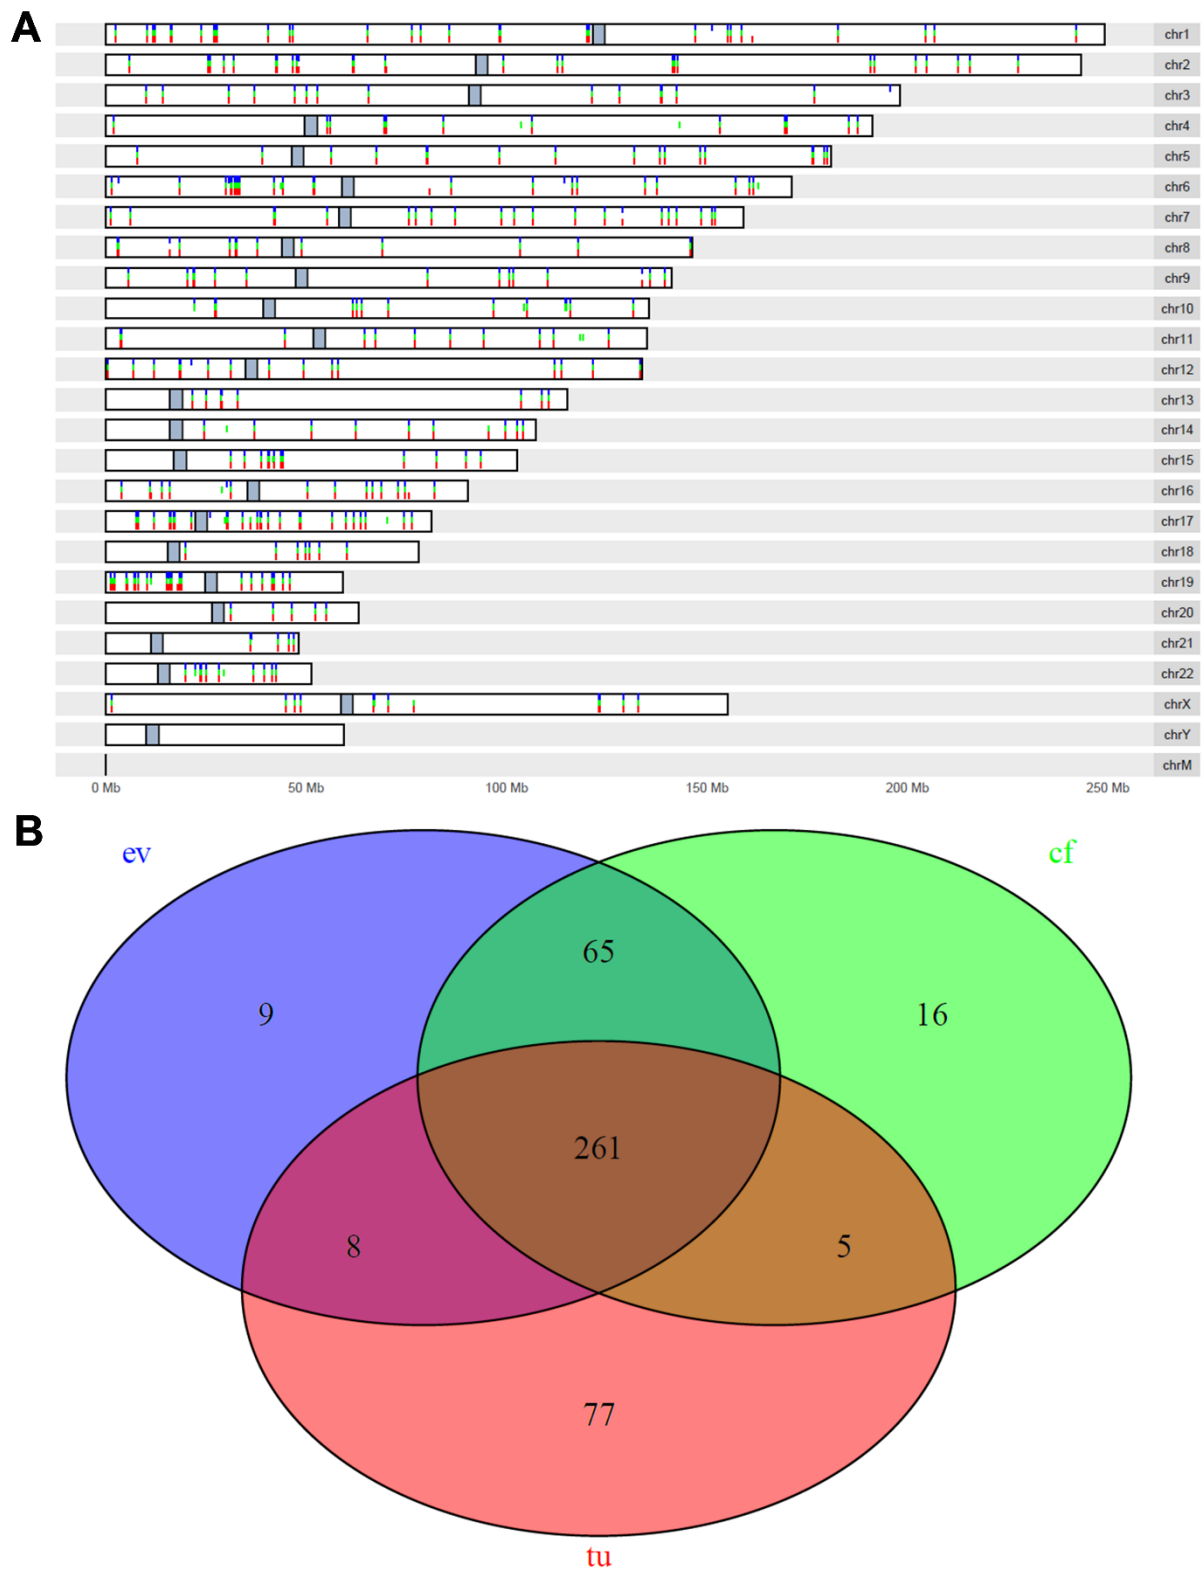

**Supplemental Figure S4:** Chromosomal positions of SNVs for patient 3. (A) Ideogram showing chromosomal locations of SNV variants and (B) Venn diagram indicating overlapping chromosomal positions for tumor- (red), ev- (blue) and cfDNA (green).

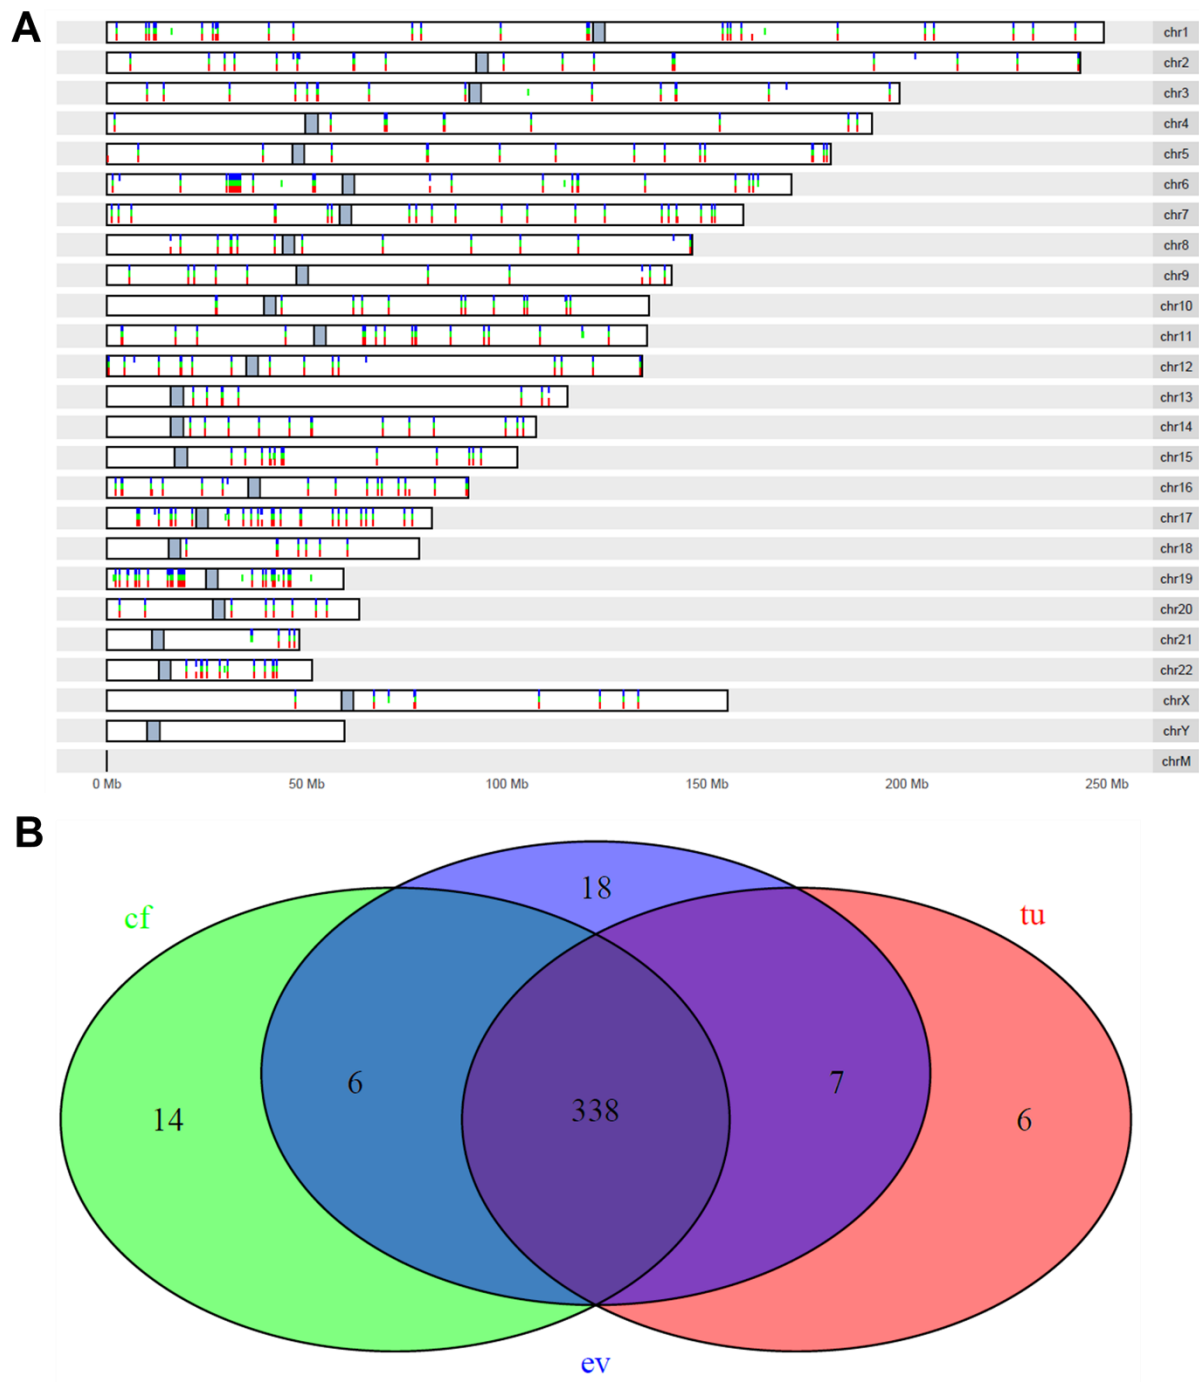

**Supplemental Figure S5:** Chromosomal positions of SNVs for patient 4. (A) Ideogram showing chromosomal locations of SNV variants and (B) Venn diagram indicating overlapping chromosomal positions for tumor- (red), ev- (blue) and cfDNA (green).

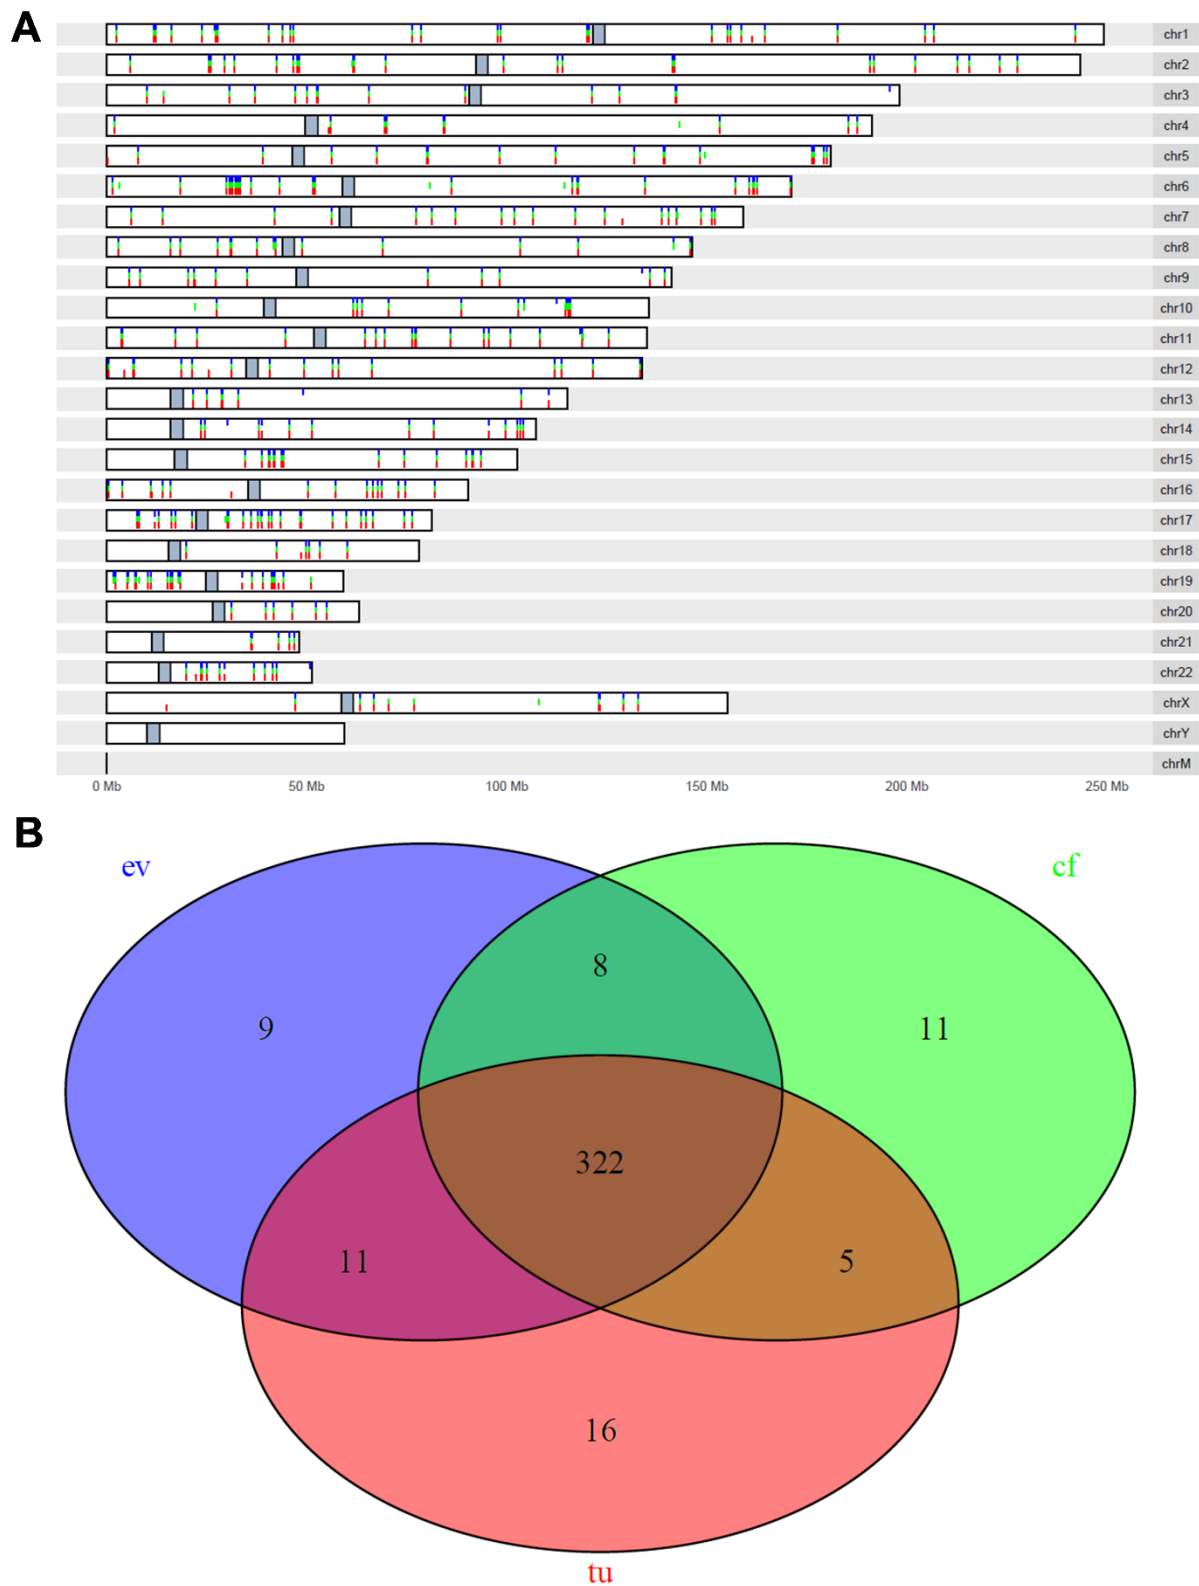

**Supplemental Figure S6:** Chromosomal positions of SNVs for patient 5. (A) Ideogram showing chromosomal locations of SNV variants and (B) Venn diagram indicating overlapping chromosomal positions for tumor- (red), ev- (blue) and cfDNA (green).

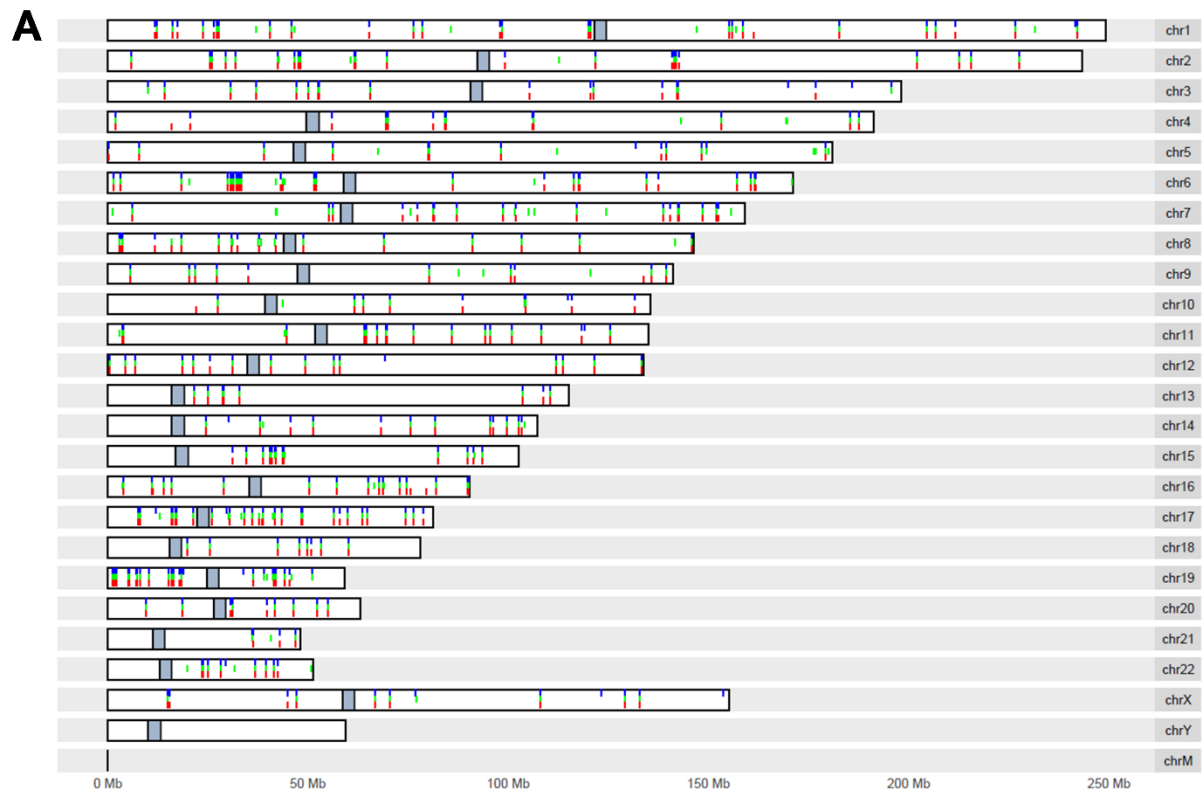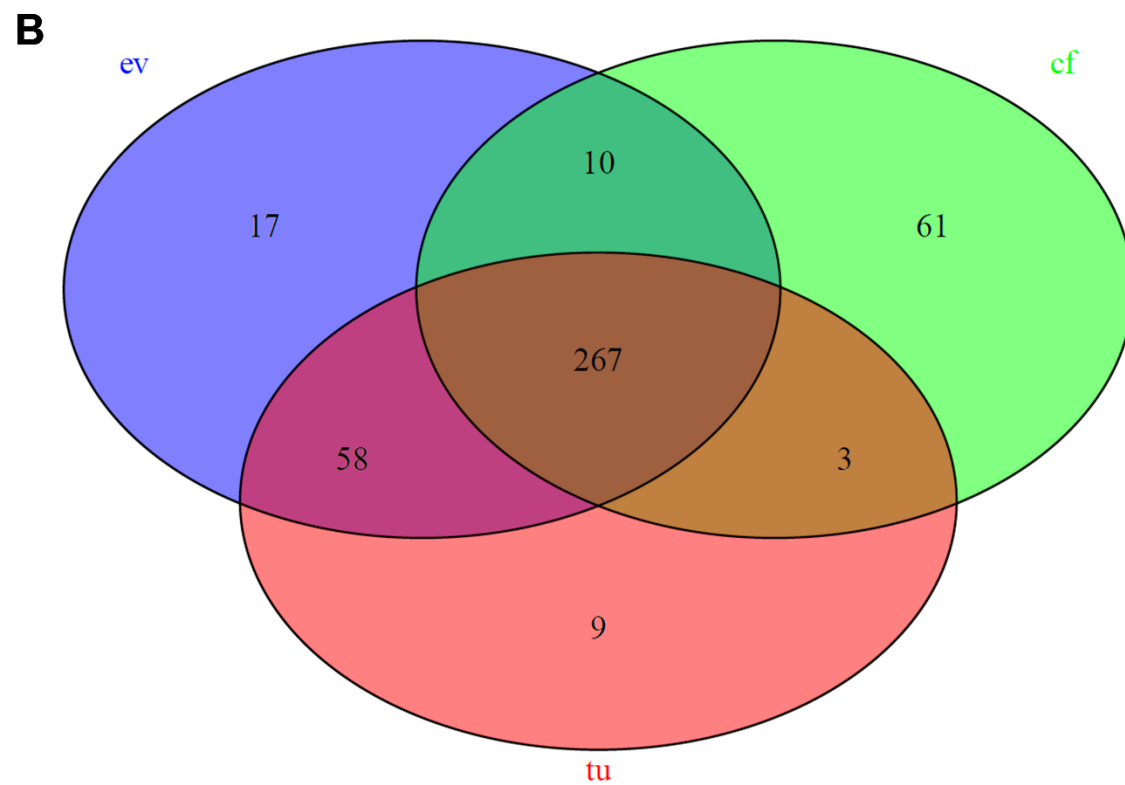

**Supplemental Figure S7:** Chromosomal positions of SNVs for patient 6. (A) Ideogram showing chromosomal locations of SNV variants and (B) Venn diagram indicating overlapping chromosomal positions for tumor- (red), ev- (blue) and cfDNA (green).

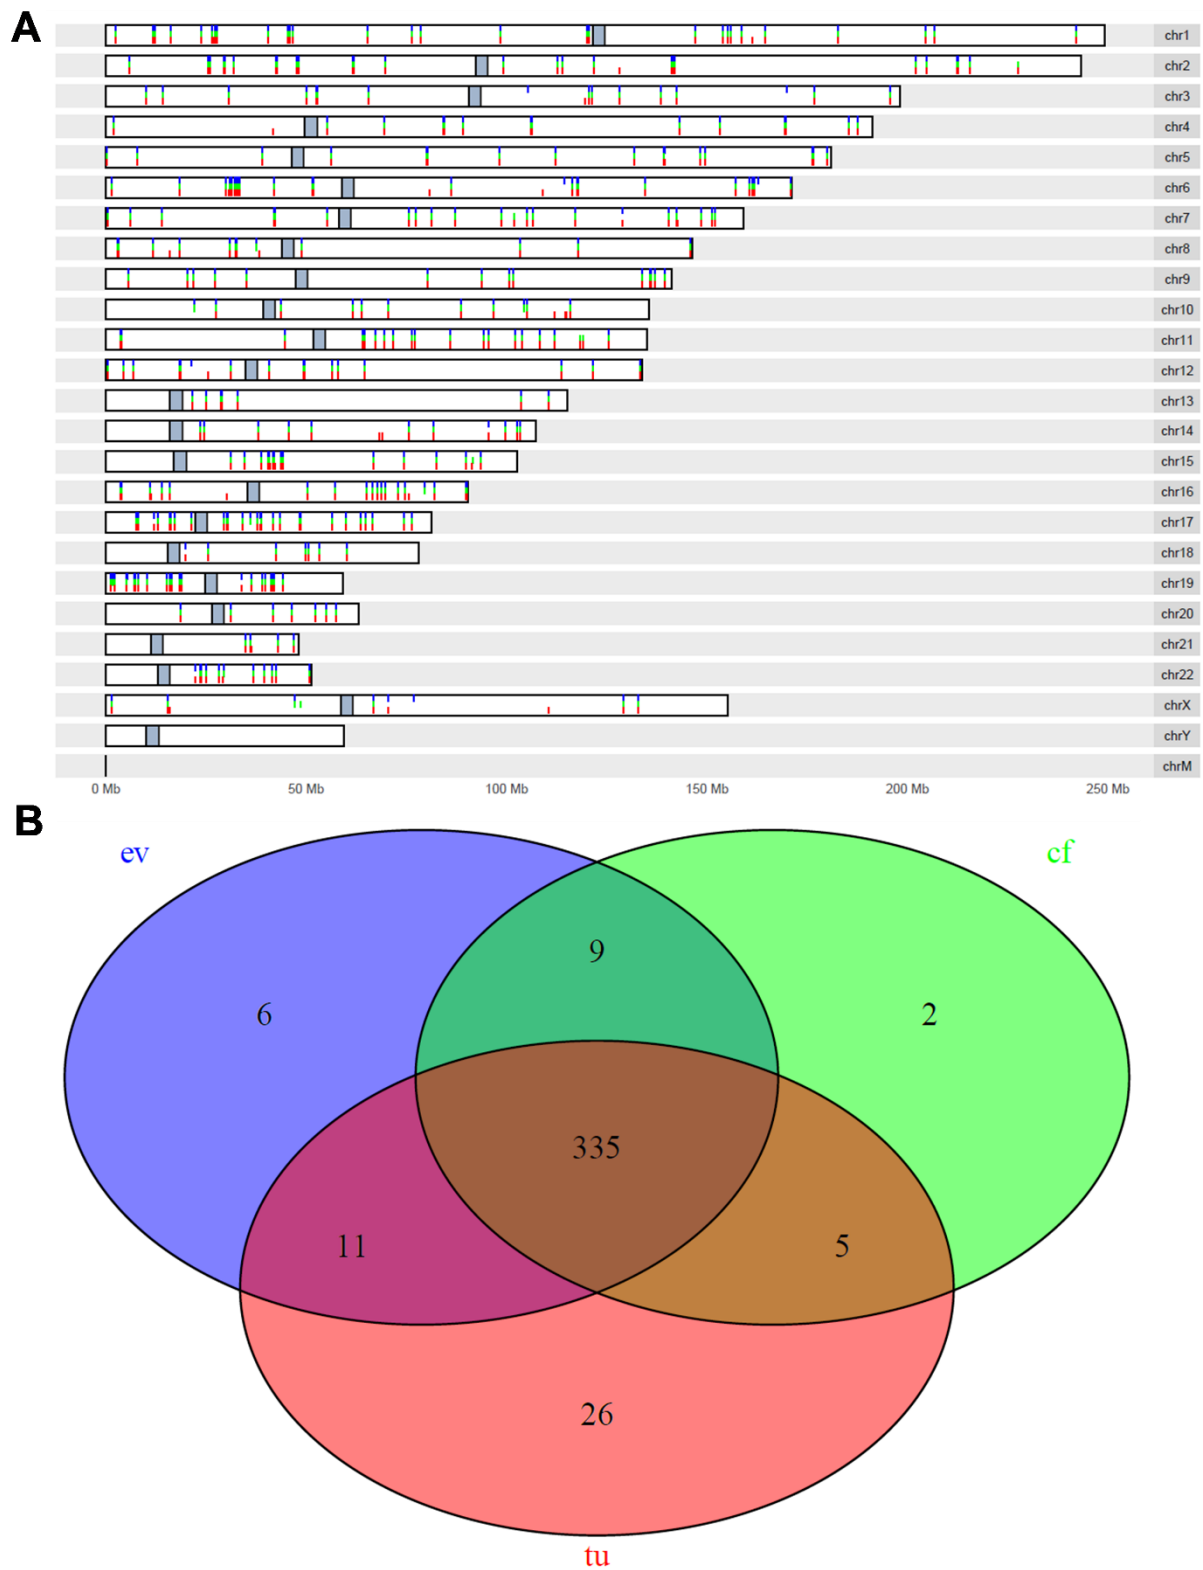

**Supplemental Figure S8:** Chromosomal positions of SNVs for patient 7. (A) Ideogram showing chromosomal locations of SNV variants and (B) Venn diagram indicating overlapping chromosomal positions for tumor- (red), ev- (blue) and cfDNA (green).

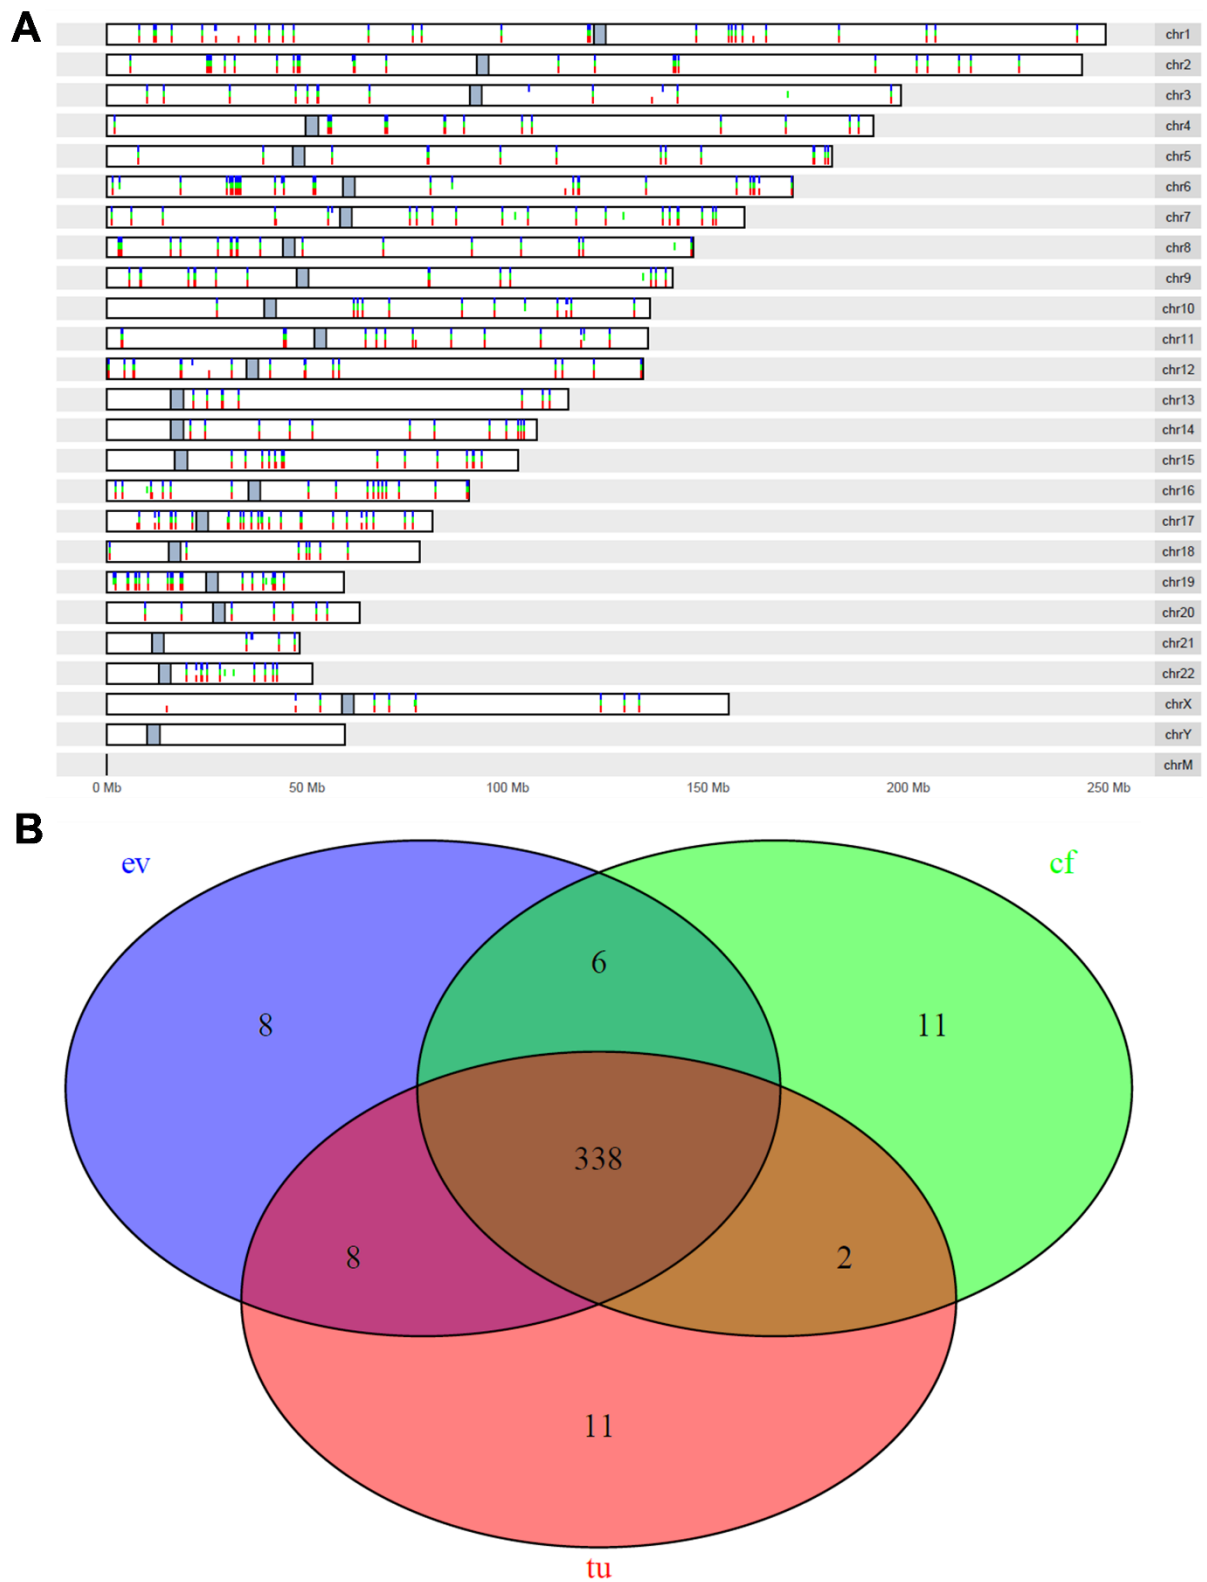

**Supplemental Figure S9:** Chromosomal positions of SNVs for patient 8. (A) Ideogram showing chromosomal locations of SNV variants and (B) Venn diagram indicating overlapping chromosomal positions for tumor- (red), ev- (blue) and cfDNA (green).

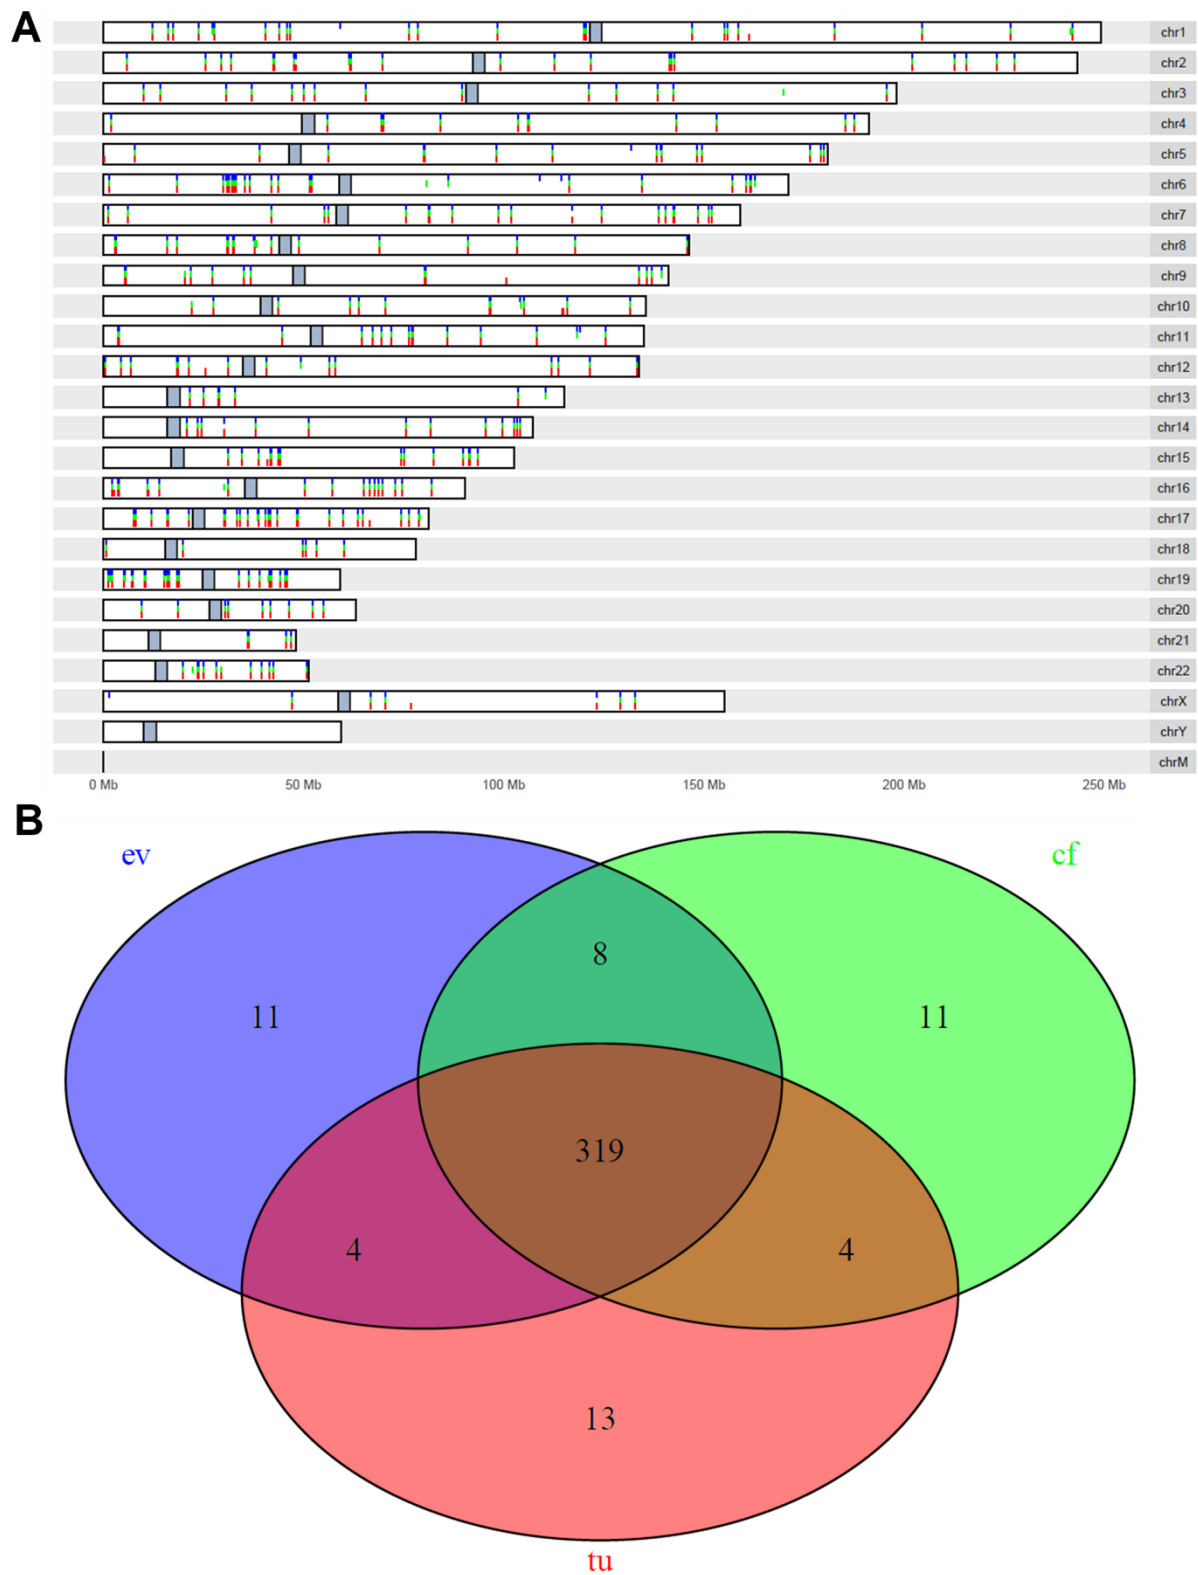

**Supplemental Figure S10:** Chromosomal positions of SNVs for patient 9. (A) Ideogram showing chromosomal locations of SNV variants and (B) Venn diagram indicating overlapping chromosomal positions for tumor- (red), ev- (blue) and cfDNA (green).



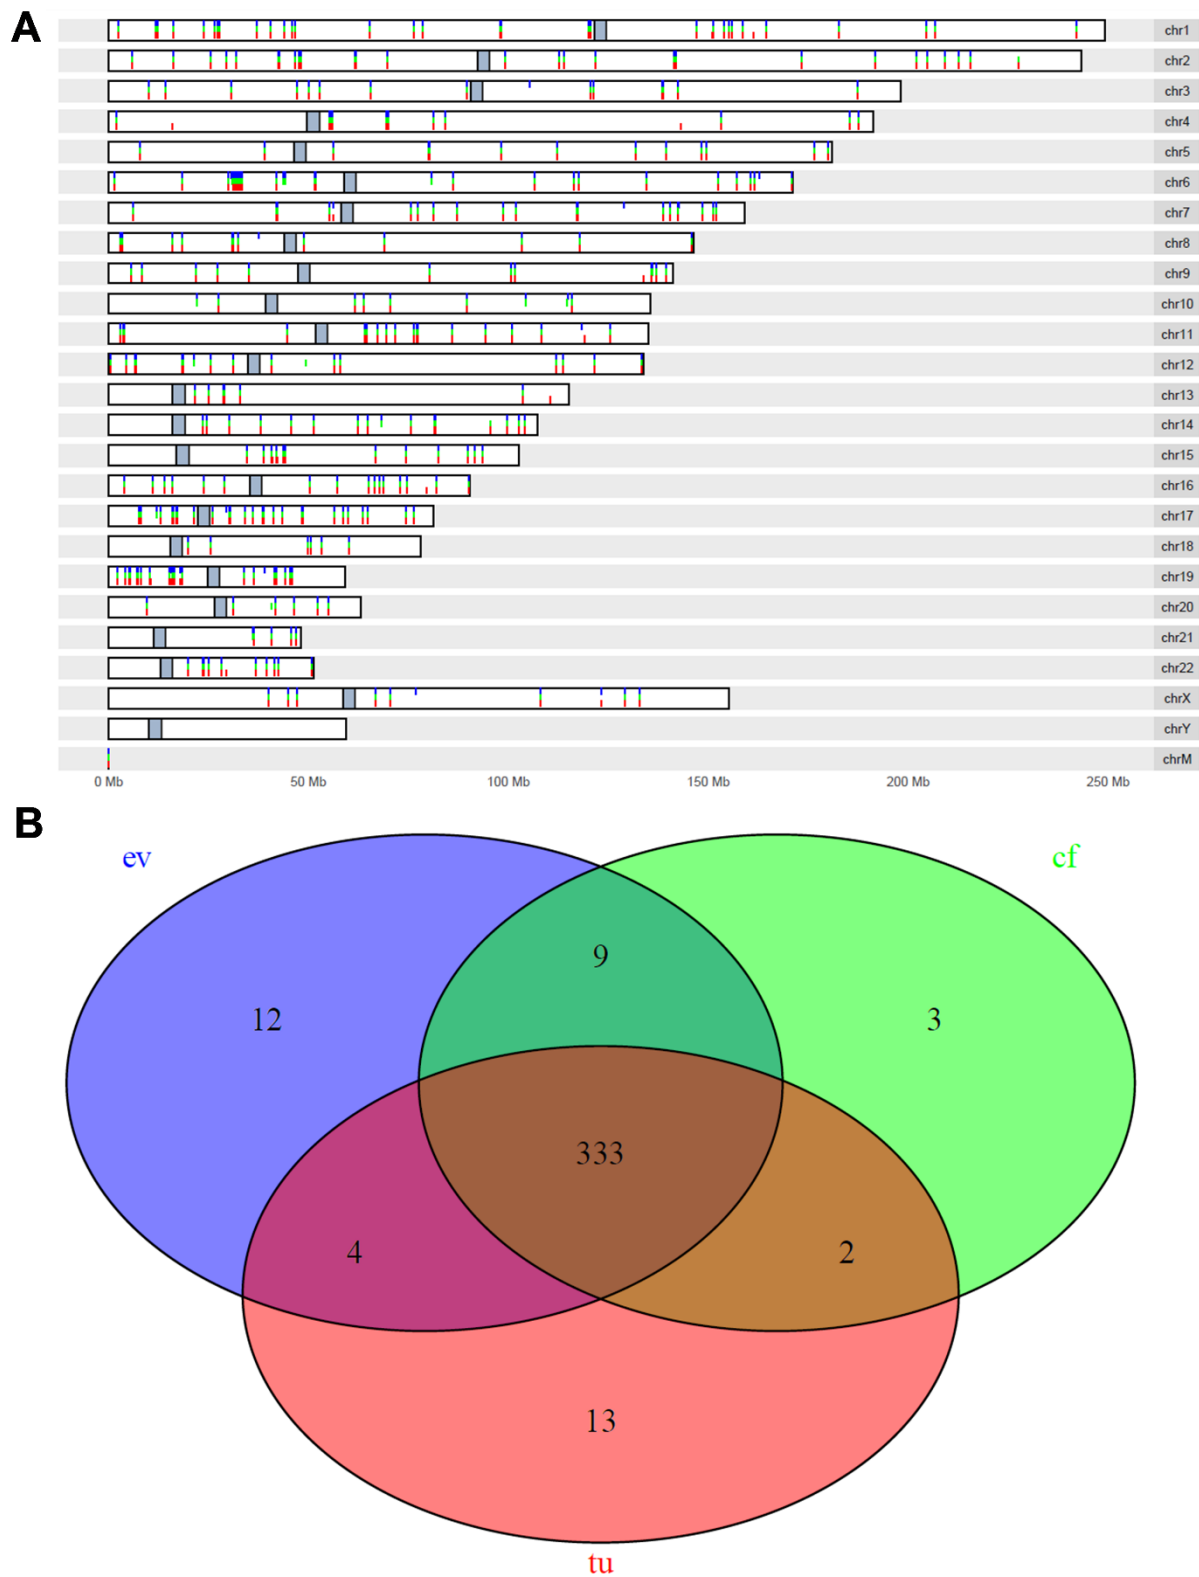

**Supplemental Figure S11:** Chromosomal positions of SNVs for patient 10. (A) Ideogram showing chromosomal locations of SNV variants and (B) Venn diagram indicating overlapping chromosomal positions for tumor- (red), ev- (blue) and cfDNA (green).

## CNVs

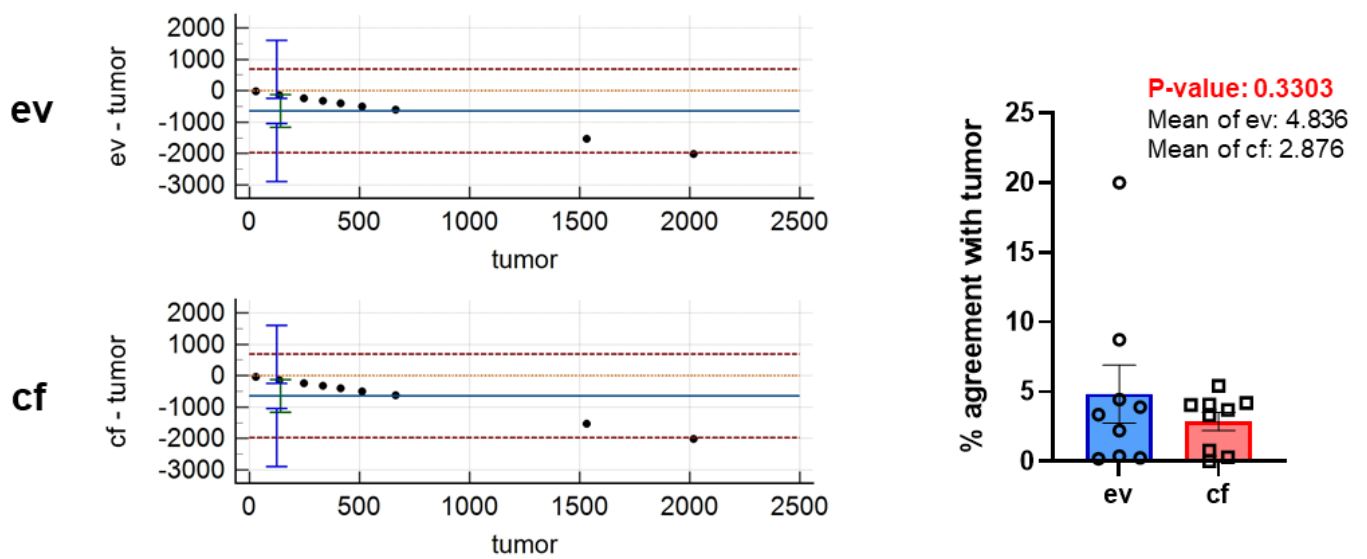

**Supplemental Figure S12:** Agreement of CNVs between ev- and tumor as well as cf- and tumorDNA. Bland-Altman plots and agreement (%) of variants detected in CNVs between tumor- and evDNA as well as tumor- and cfDNA. Statistical tests: (A) Two-tailed paired Student t-test.



# Filtered SNVs (AF $\leq 1\%$ ) with moderate and high impact (deleterious Condel score)

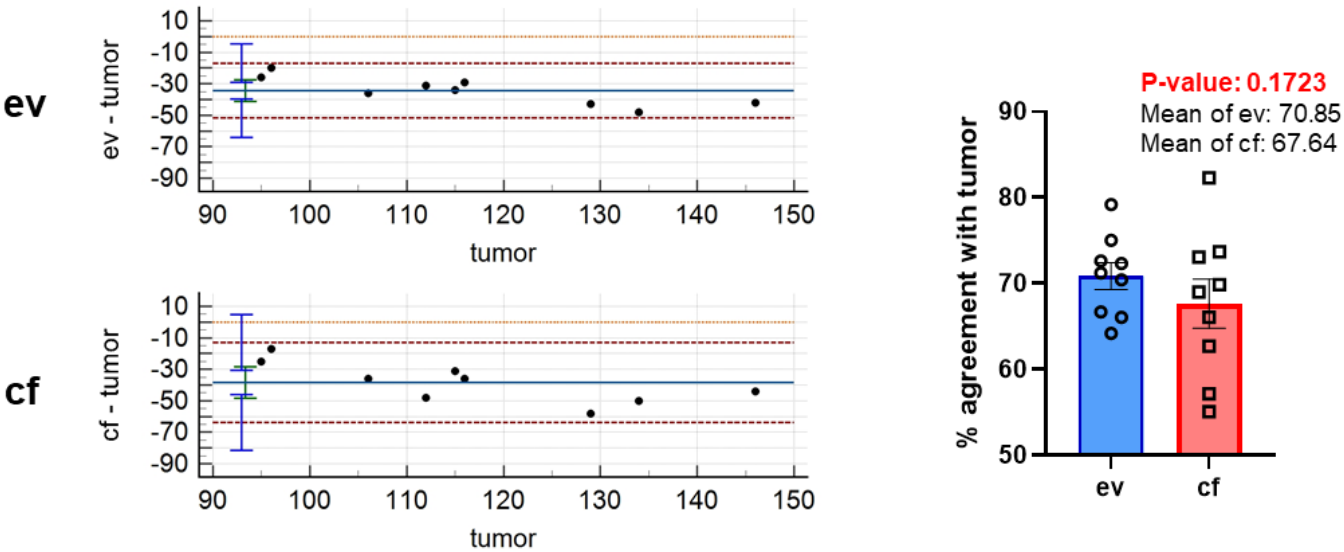

**Supplemental Figure S14:** Agreement of SNVs between ev- and tumor as well as cf- and tumorDNA. Bland-Altman plots and agreement (%) of variantsdetectedinfilteredSNVs(AF $\leq 1\%$ )withmoderateandhighimpactanda deleterious Condel score between tumor- and evDNA as well as tumor- and cfDNA. Statistical tests: (A) Two-tailed paired Student t-test.

## Alteration plots for filtered SNVs with moderate and high impact (damaging PP-2 score)

**A**

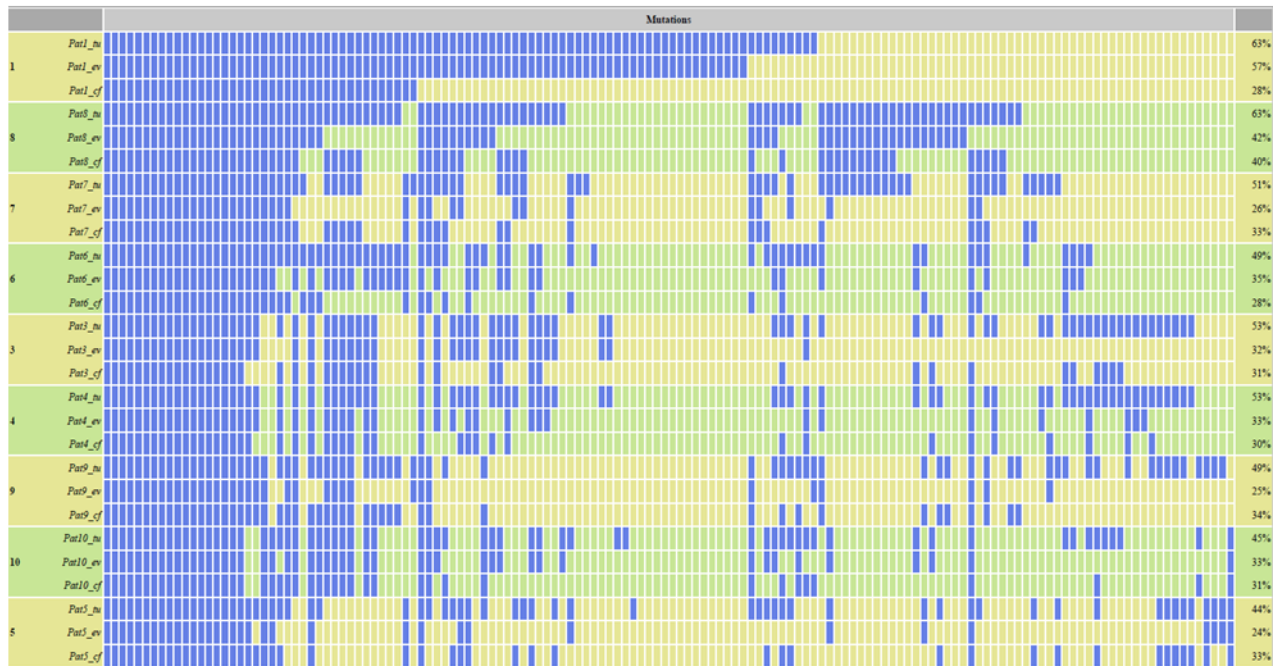

**B**

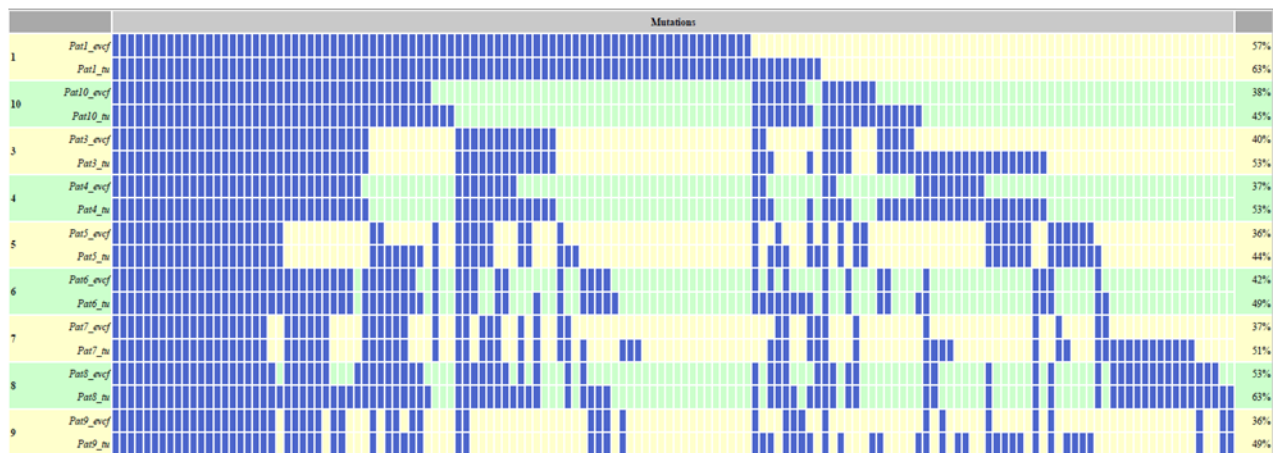

**Supplemental Figure S15:** Representative alteration plots for variants detected in tumor- and ev- or cfDNA. Blue bars indicate SNVs present in the corresponding sample indicated at the left side as tu/ev/cf. SNVs were preselected for impact score mod-erate/high and PP-2 score damaging (n=144). (A) Alteration plot for SNVs of tumor-, ev- and cfDNA. (B) Alteration plot for SNVs of tumorDNA and a combination of ev- and cfDNA.

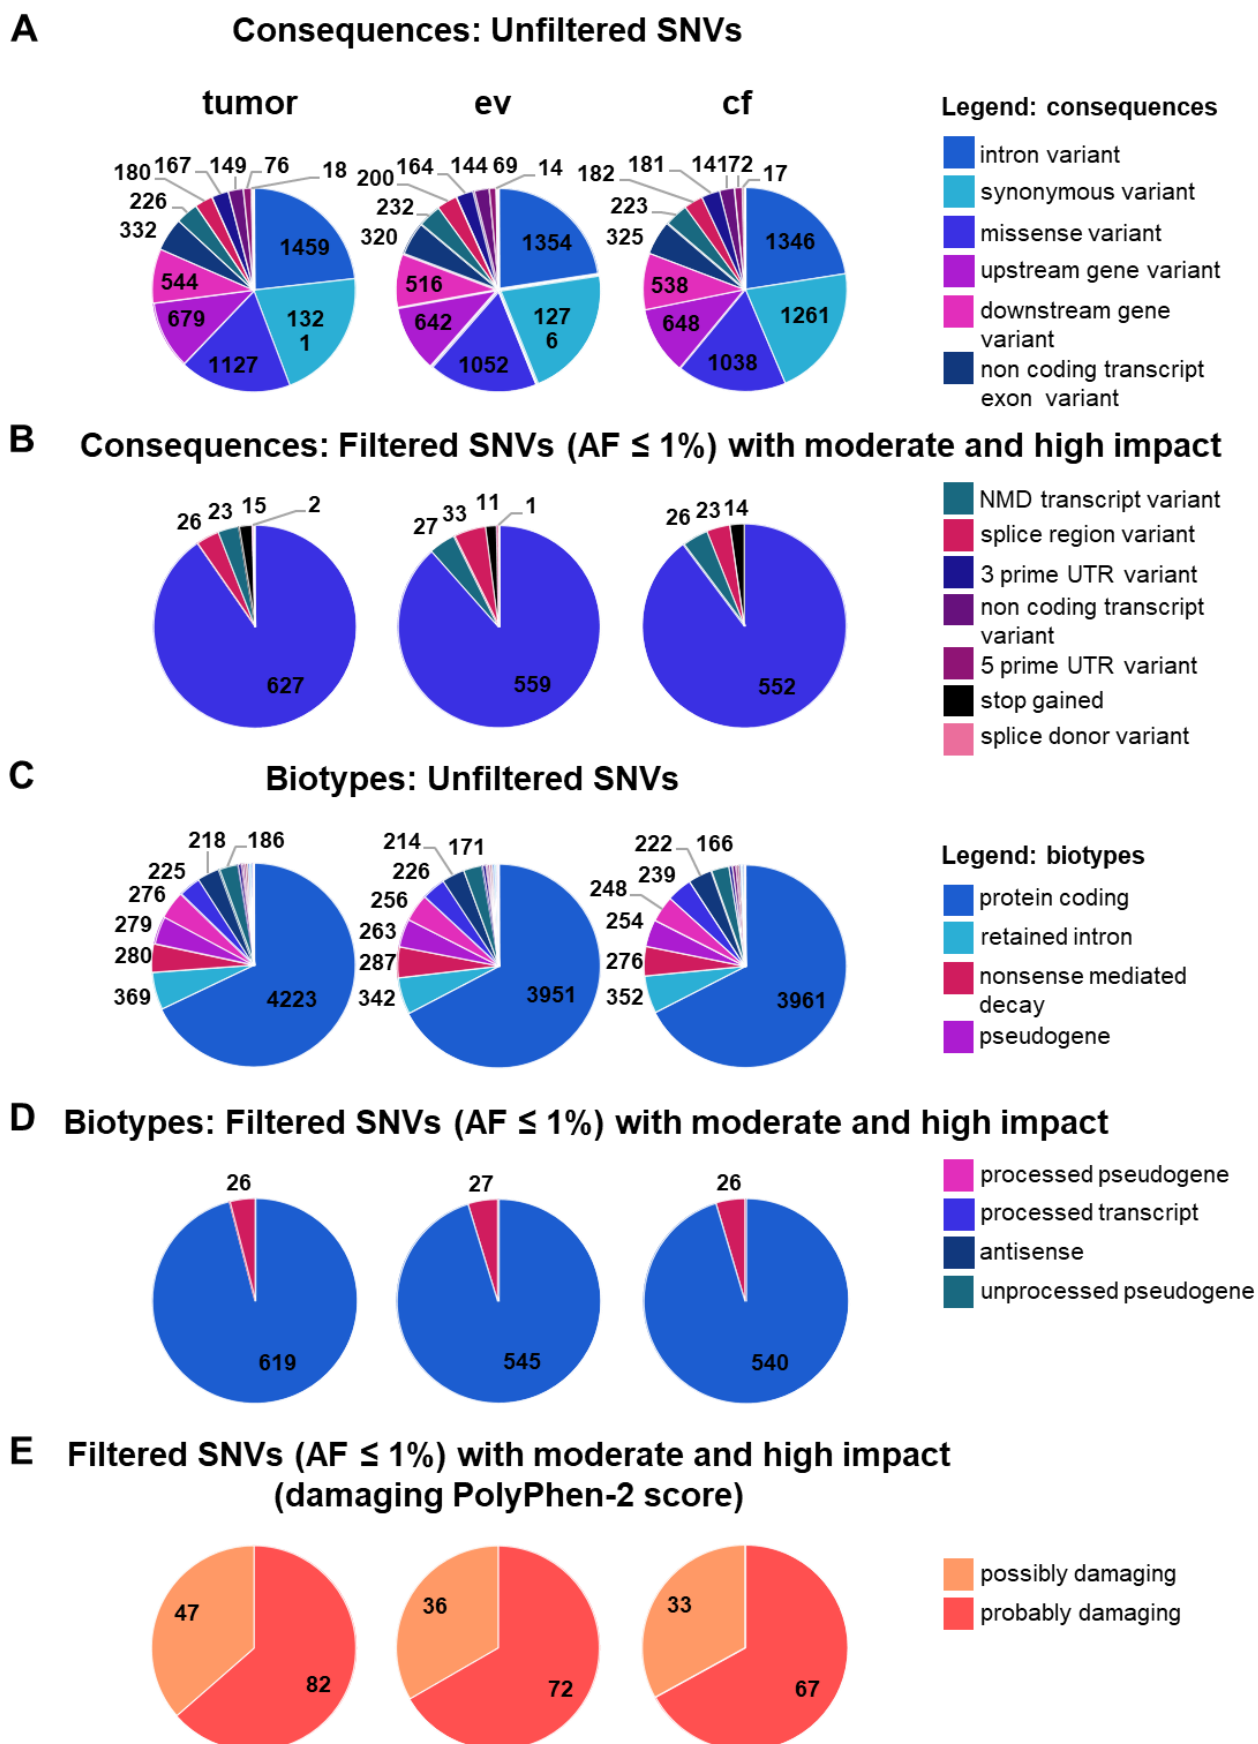

**Supplemental Figure S16:** Analysis of SNVs for patient 1. (A) Consequences of unfiltered SNVs and (B) filtered SNVs (AF  $\leq 1\%$ ) with moderate and high impact, (C) biotypes of unfiltered and (D) filtered SNVs (AF  $\leq 1\%$ ) with moderate and high impact as well as (E) number of variants with a possibly or probably damaging PP-2 score of filtered SNVs (AF  $\leq 1\%$ ) with moderate and high impact found in tumor-, ev- and cfDNA.

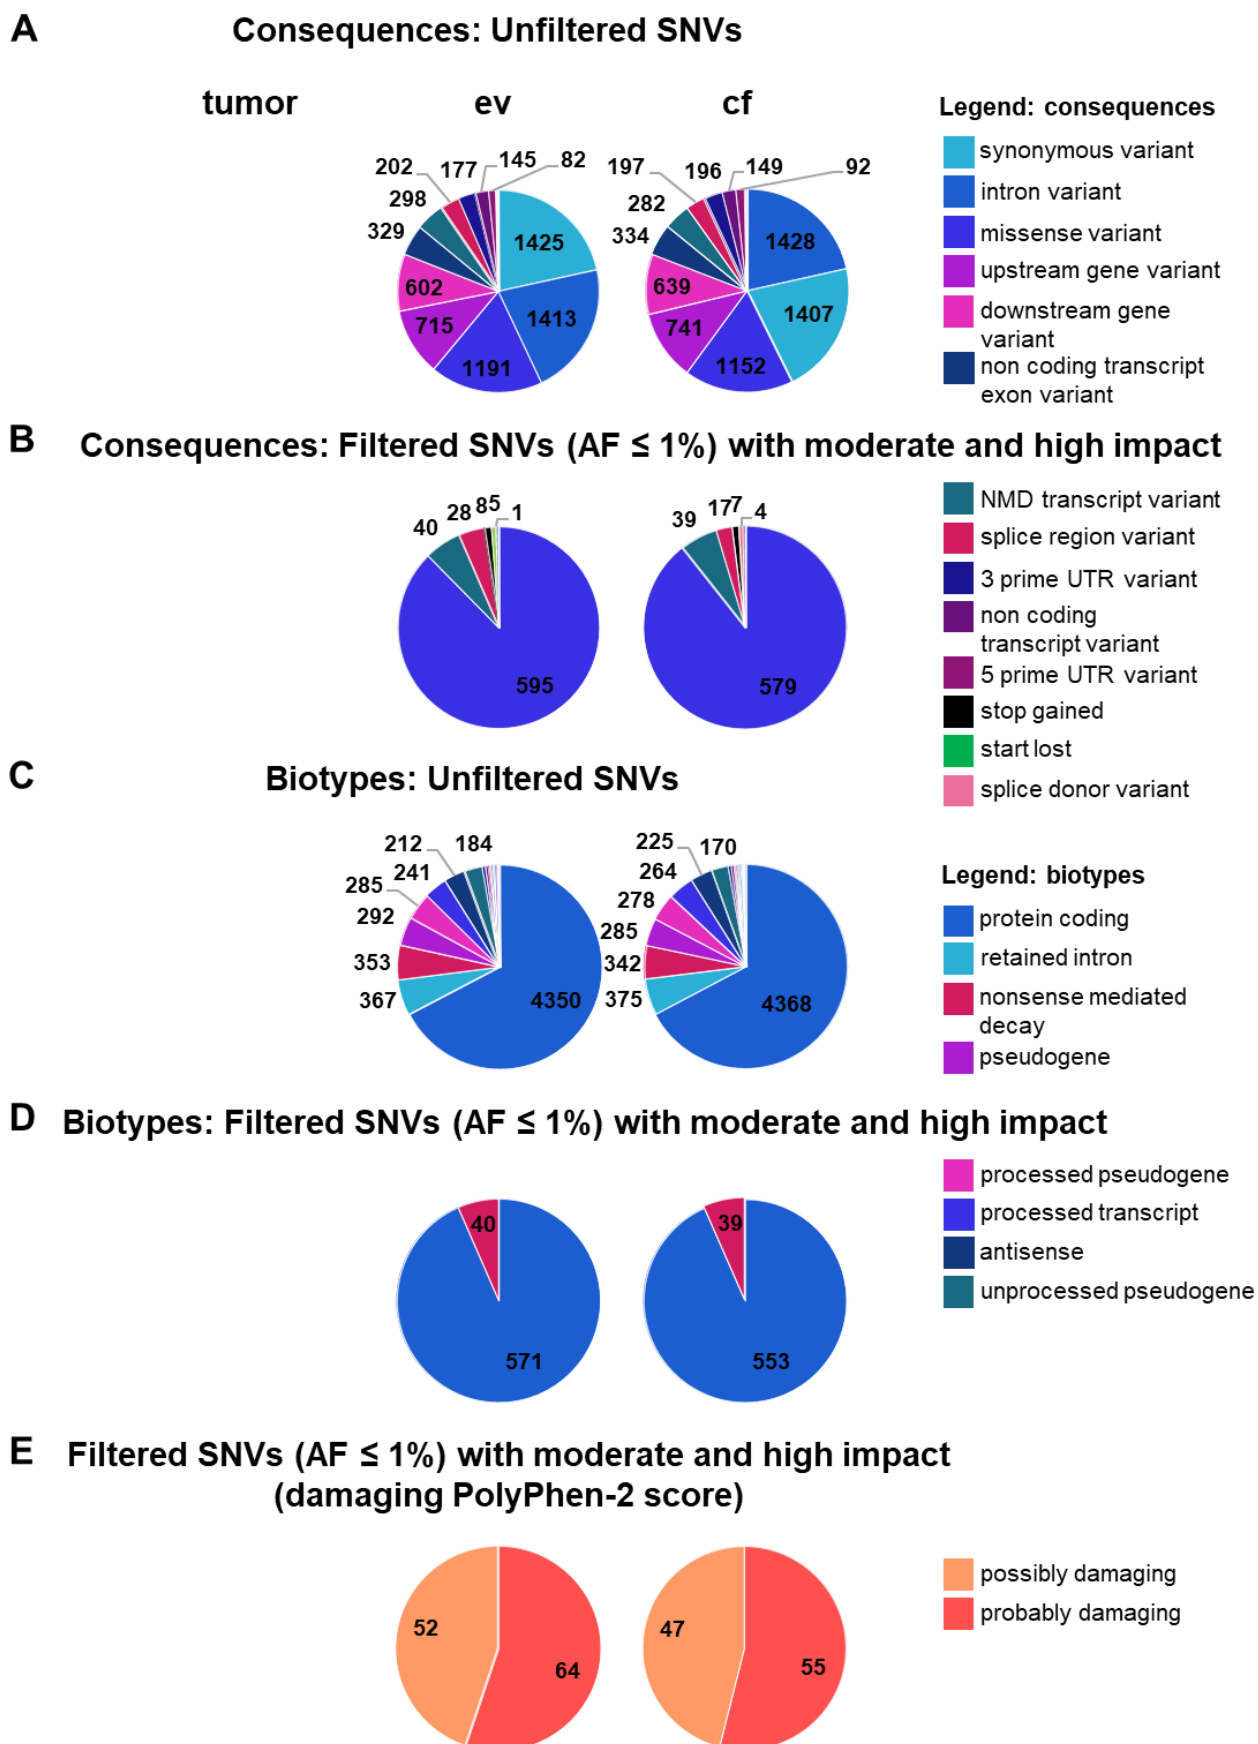

**Supplemental Figure S17:** Analysis of SNVs for patient 2. (A) Consequences of unfiltered SNVs and (B) filtered SNVs (AF ≤ 1%) with moderate and high impact, (C) biotypes of unfiltered and (D) filtered SNVs (AF ≤ 1%) with moderate and high impact as well as (E) number of variants with a possibly or probably damaging PP-2 score of filtered SNVs (AF ≤ 1%) with moderate and high impact found in tumor-, ev- and cfDNA.

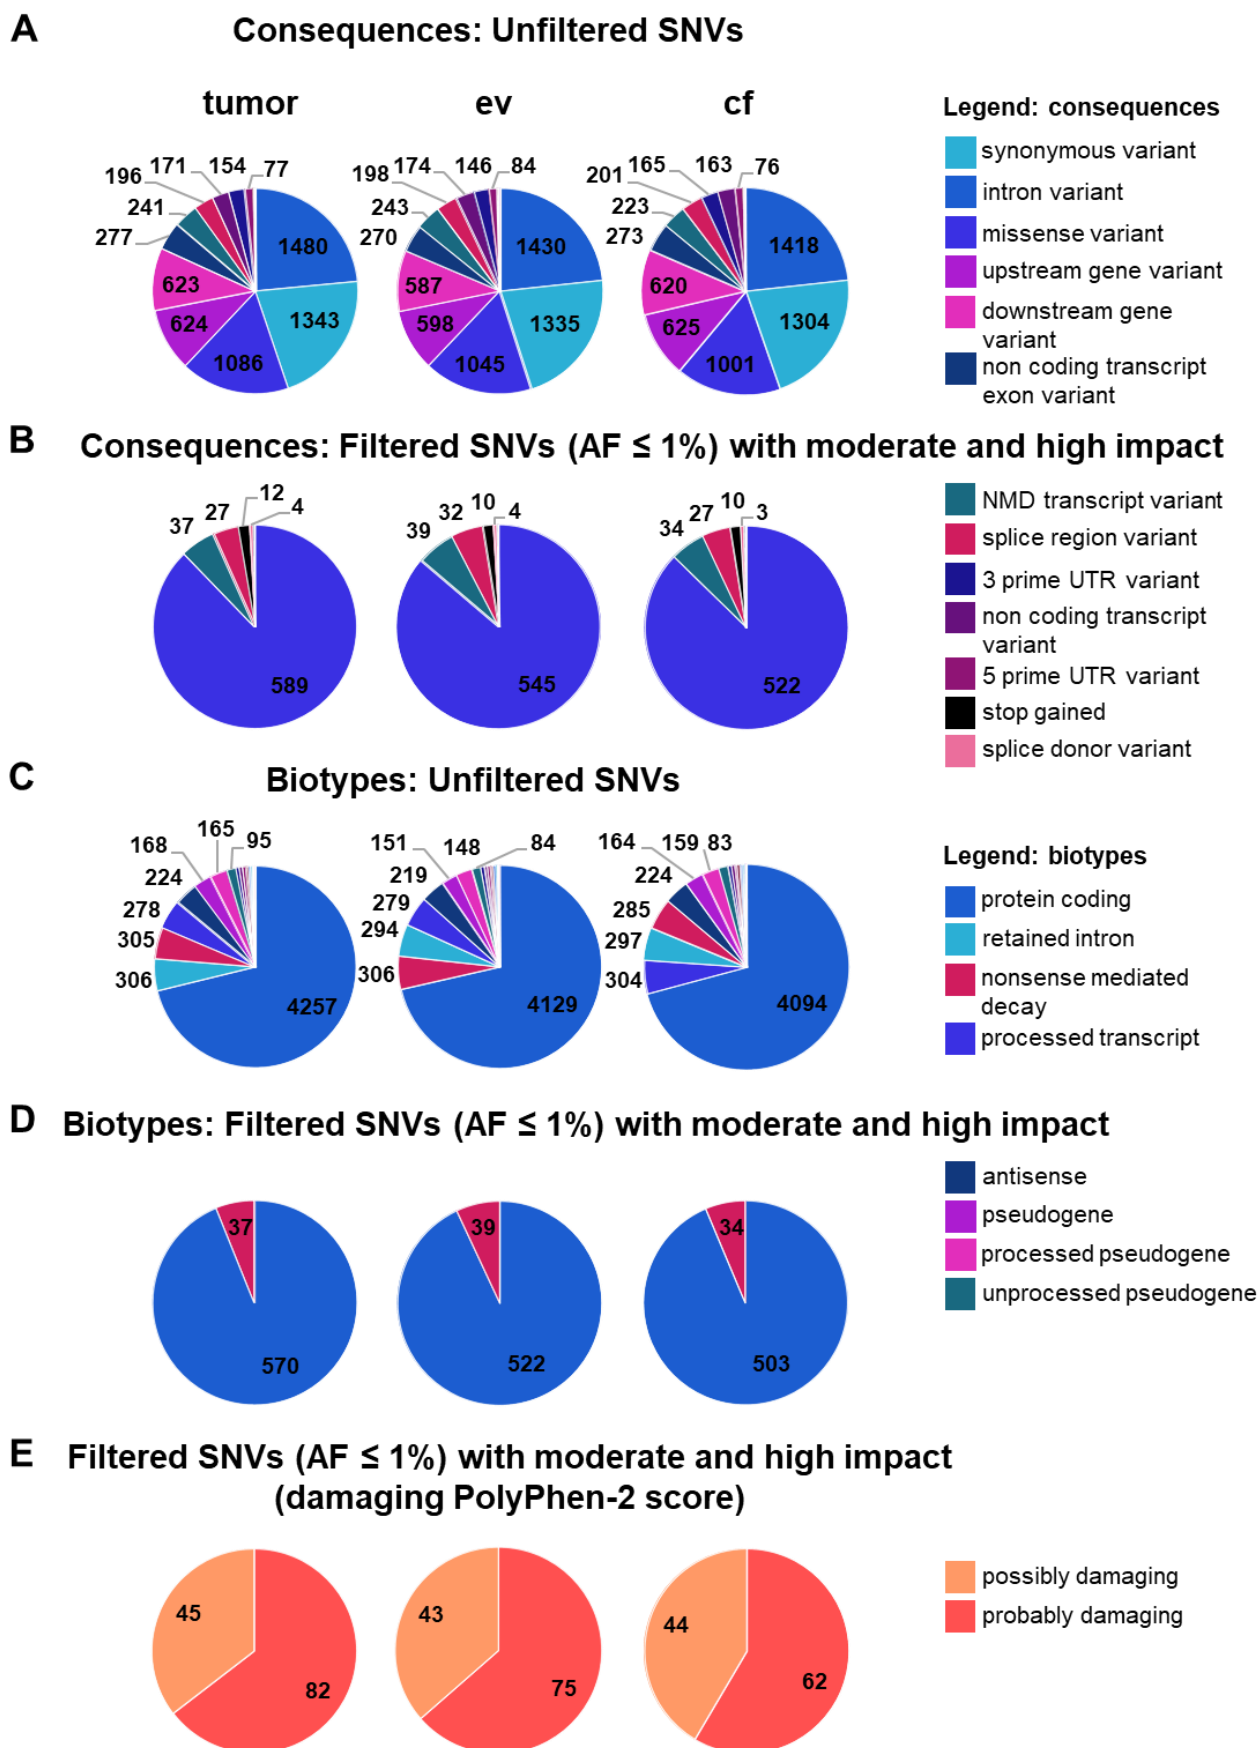

**Supplemental Figure S18:** Analysis of SNVs for patient 3. (A) Consequences of unfiltered SNVs and (B) filtered SNVs (AF ≤ 1%) with moderate and high impact, (C) biotypes of unfiltered and (D) filtered SNVs (AF ≤ 1%) with moderate and high impact as well as (E) number of variants with a possibly or probably damaging PP-2 score of filtered SNVs (AF ≤ 1%) with moderate and high impact found in tumor-, ev- and cfDNA.



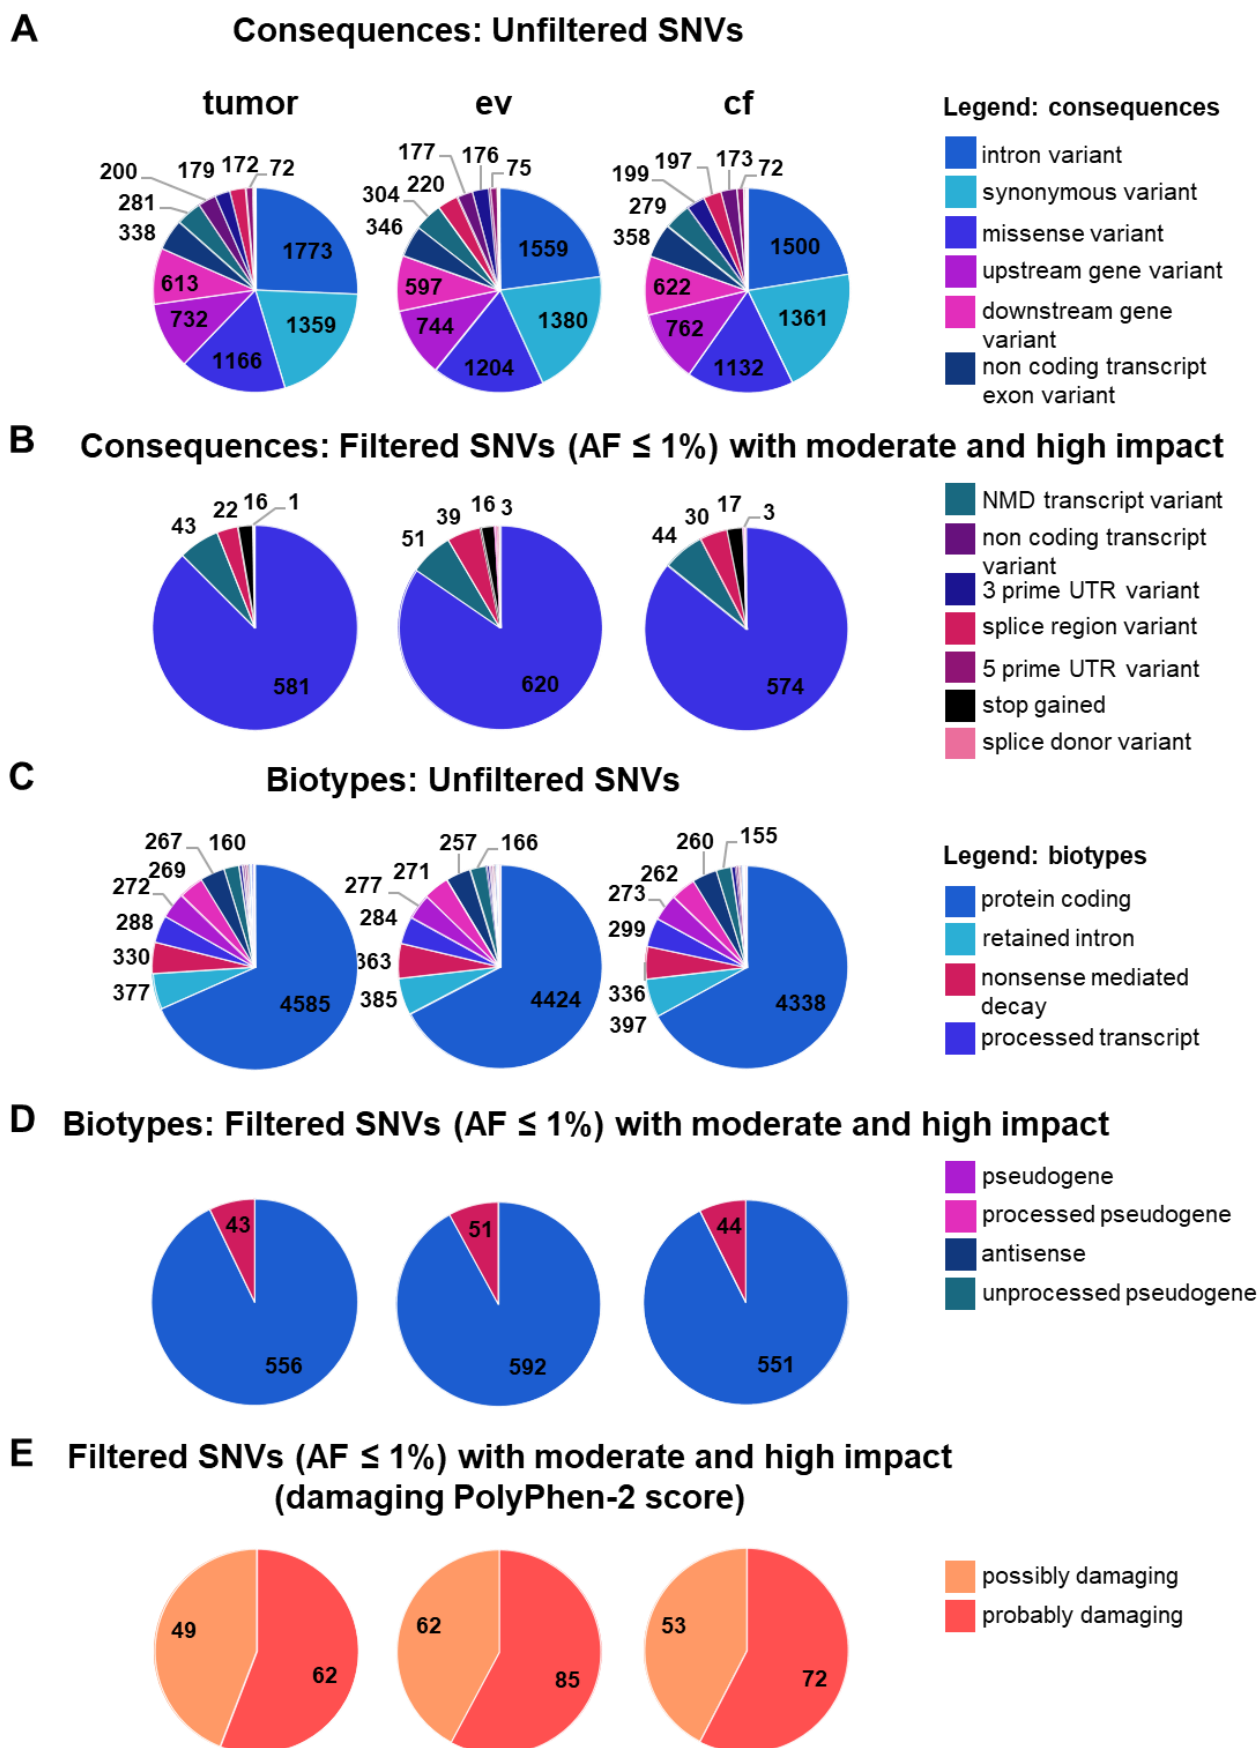

**Supplemental Figure S19:** Analysis of SNVs for patient 4. (A) Consequences of unfiltered SNVs and (B) filtered SNVs (AF ≤ 1%) with moderate and high impact, (C) biotypes of unfiltered and (D) filtered SNVs (AF ≤ 1%) with moderate and high impact as well as (E) number of variants with a possibly or probably damaging PP-2 score of filtered SNVs (AF ≤ 1%) with moderate and high impact found in tumor-, ev- and cfDNA.

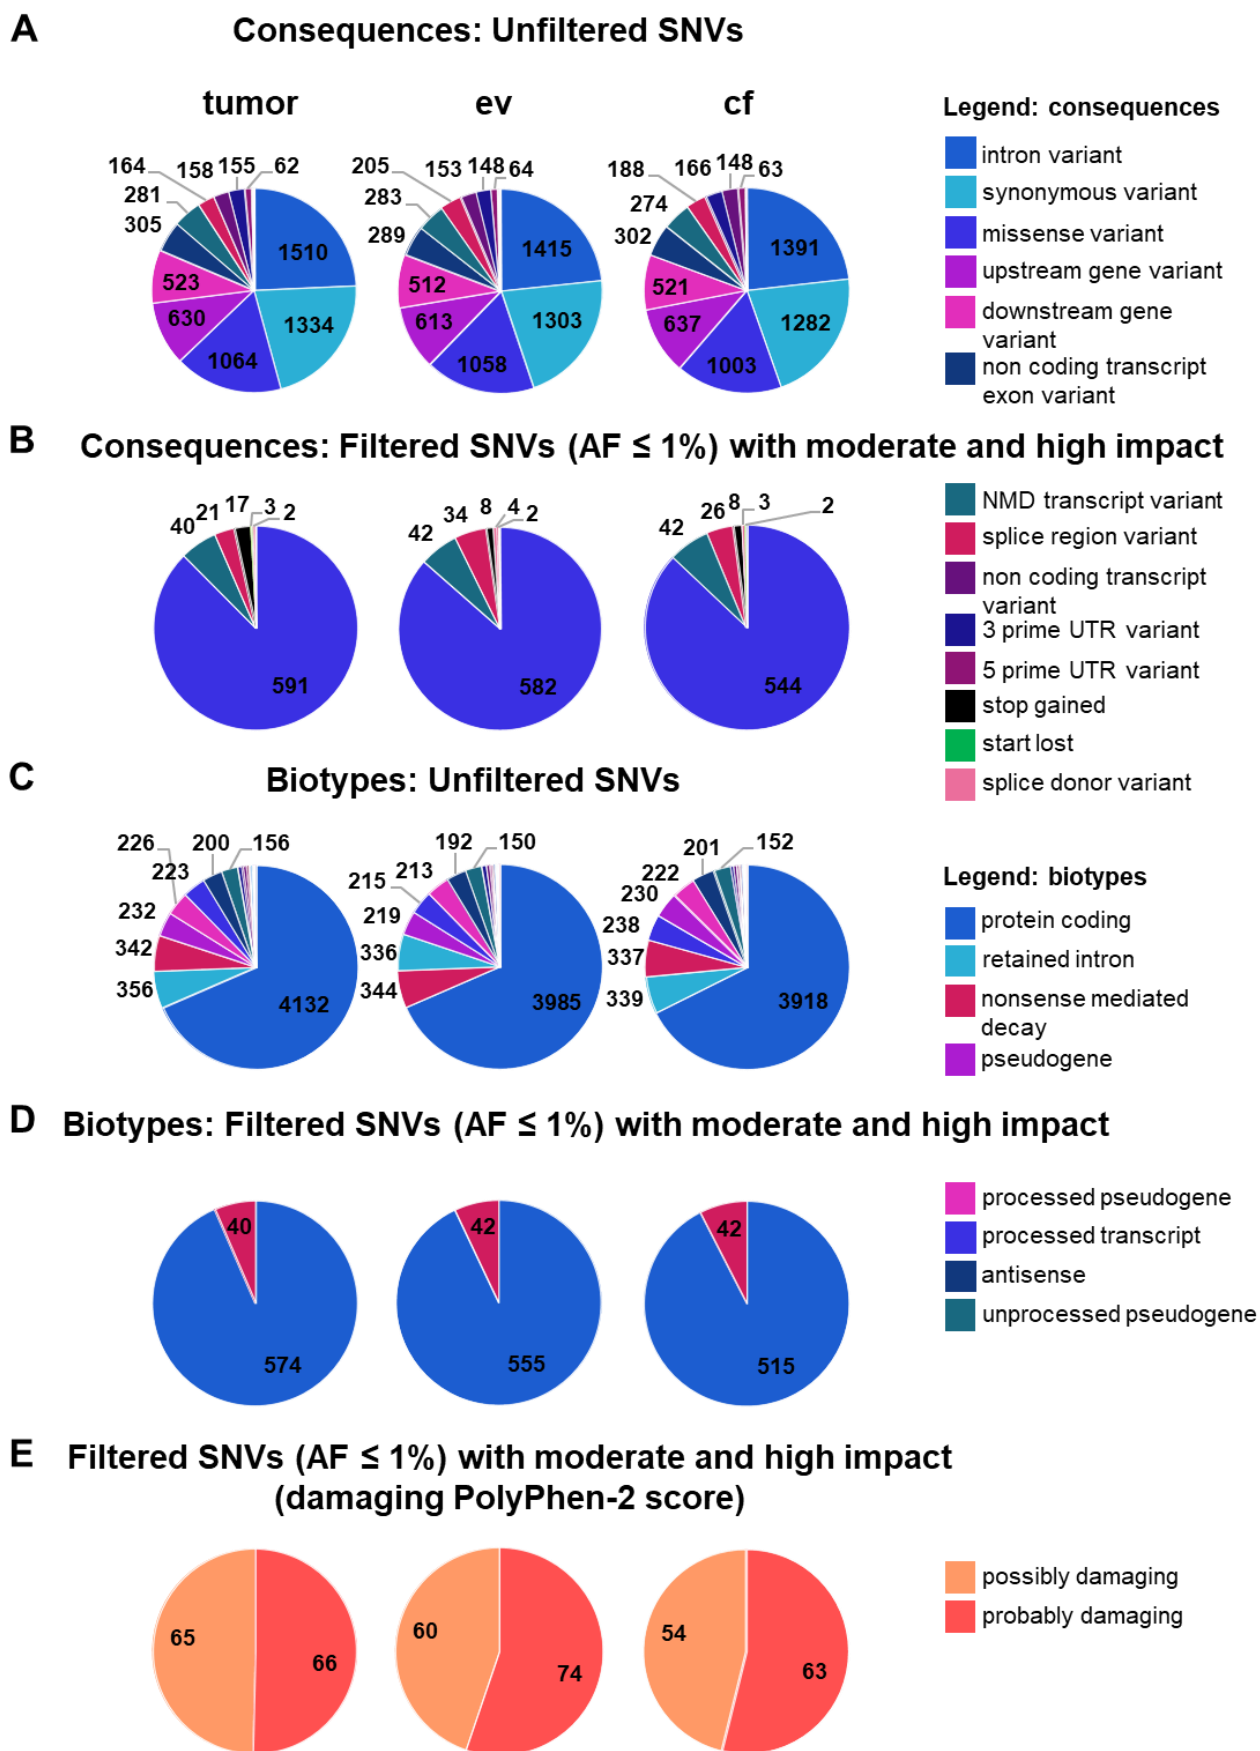

**Supplemental Figure S20:** Analysis of SNVs for patient 5. (A) Consequences of unfiltered SNVs and (B) filtered SNVs (AF ≤ 1%) with moderate and high impact, (C) biotypes of unfiltered and (D) filtered SNVs (AF ≤ 1%) with moderate and high impact as well as (E) number of variants with a possibly or probably damaging PP-2 score of filtered SNVs (AF ≤ 1%) with moderate and high impact found in tumor-, ev- and cfDNA.

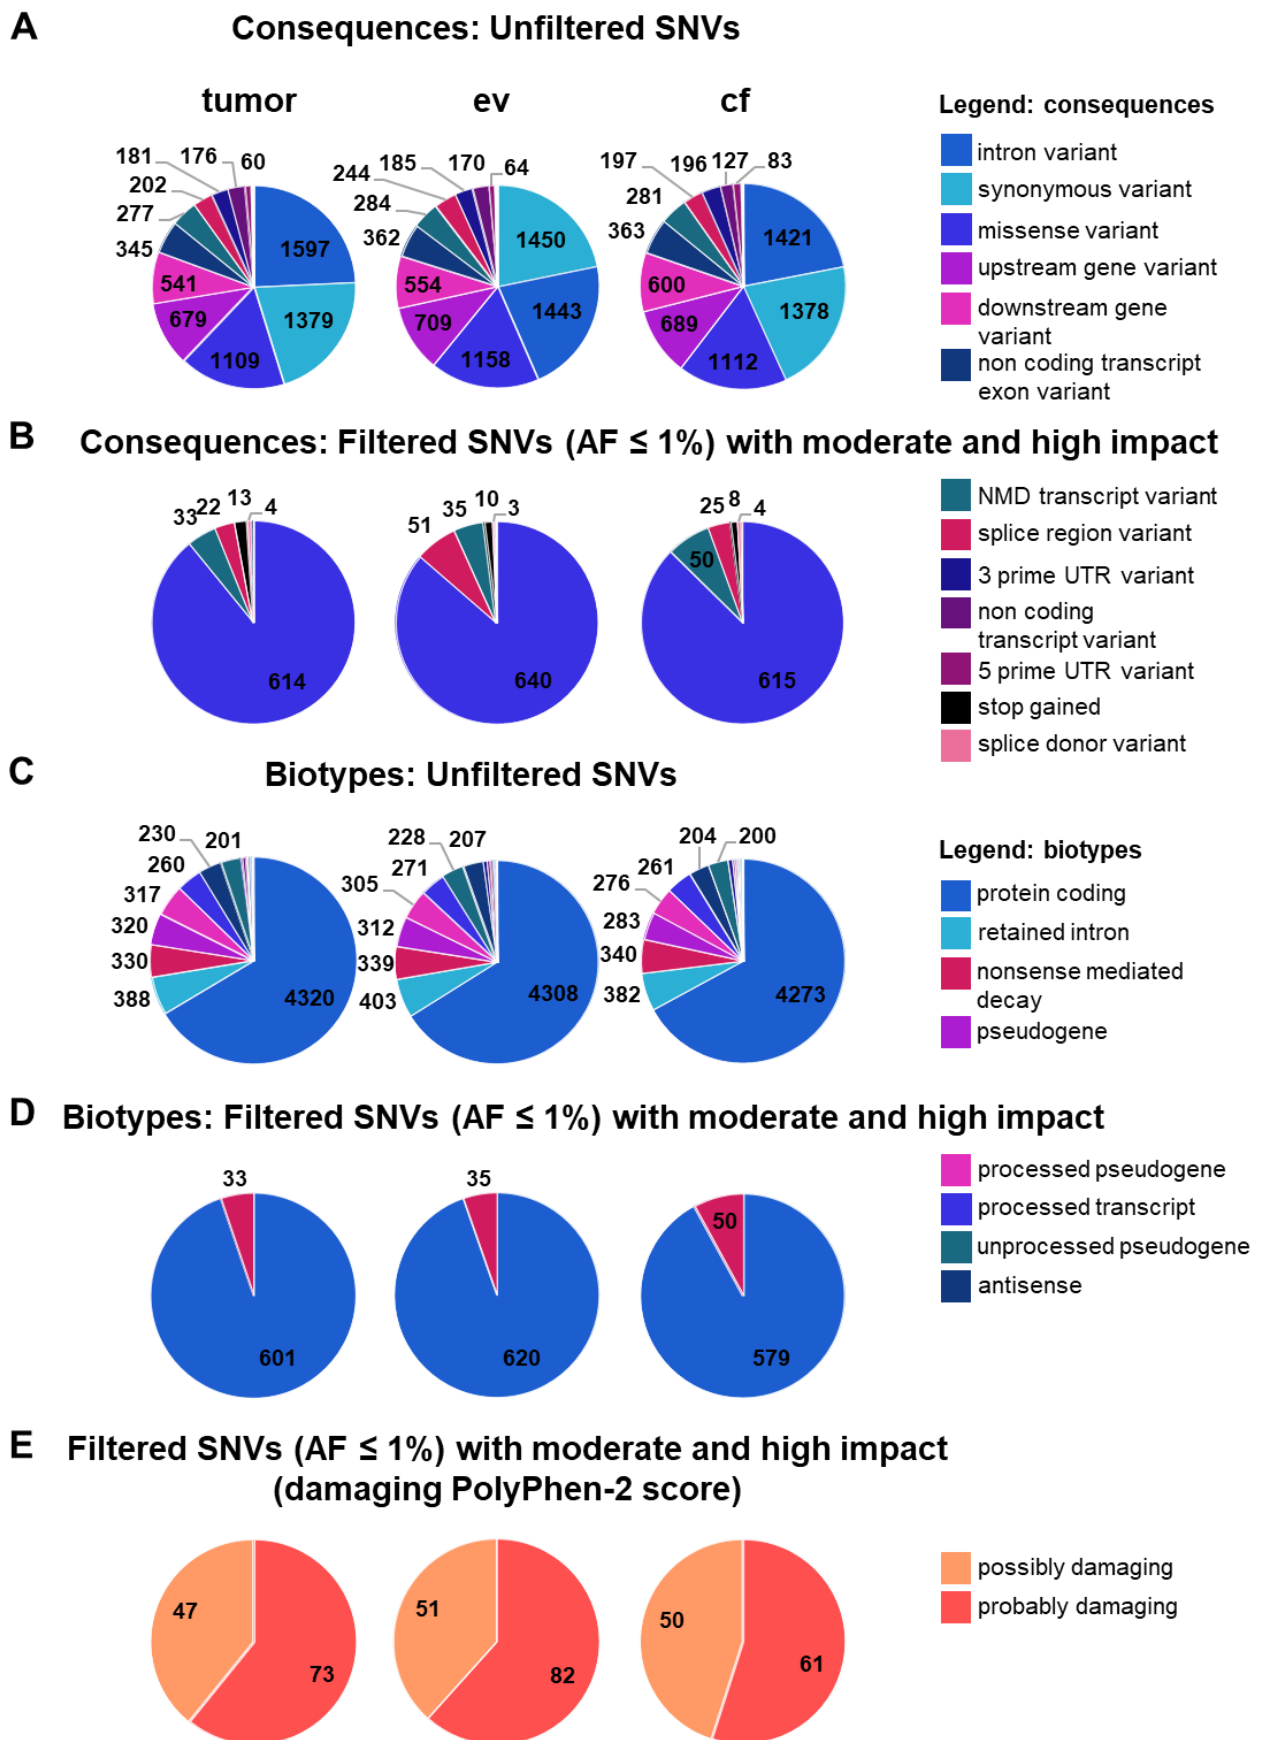

**Supplemental Figure S21:** Analysis of SNVs for patient 6. (A) Consequences of unfiltered SNVs and (B) filtered SNVs (AF ≤ 1%) with moderate and high impact, (C) biotypes of unfiltered and (D) filtered SNVs (AF ≤ 1%) with moderate and high impact as well as (E) number of variants with a possibly or probably damaging PP-2 score of filtered SNVs (AF ≤ 1%) with moderate and high impact found in tumor-, ev- and cfDNA.

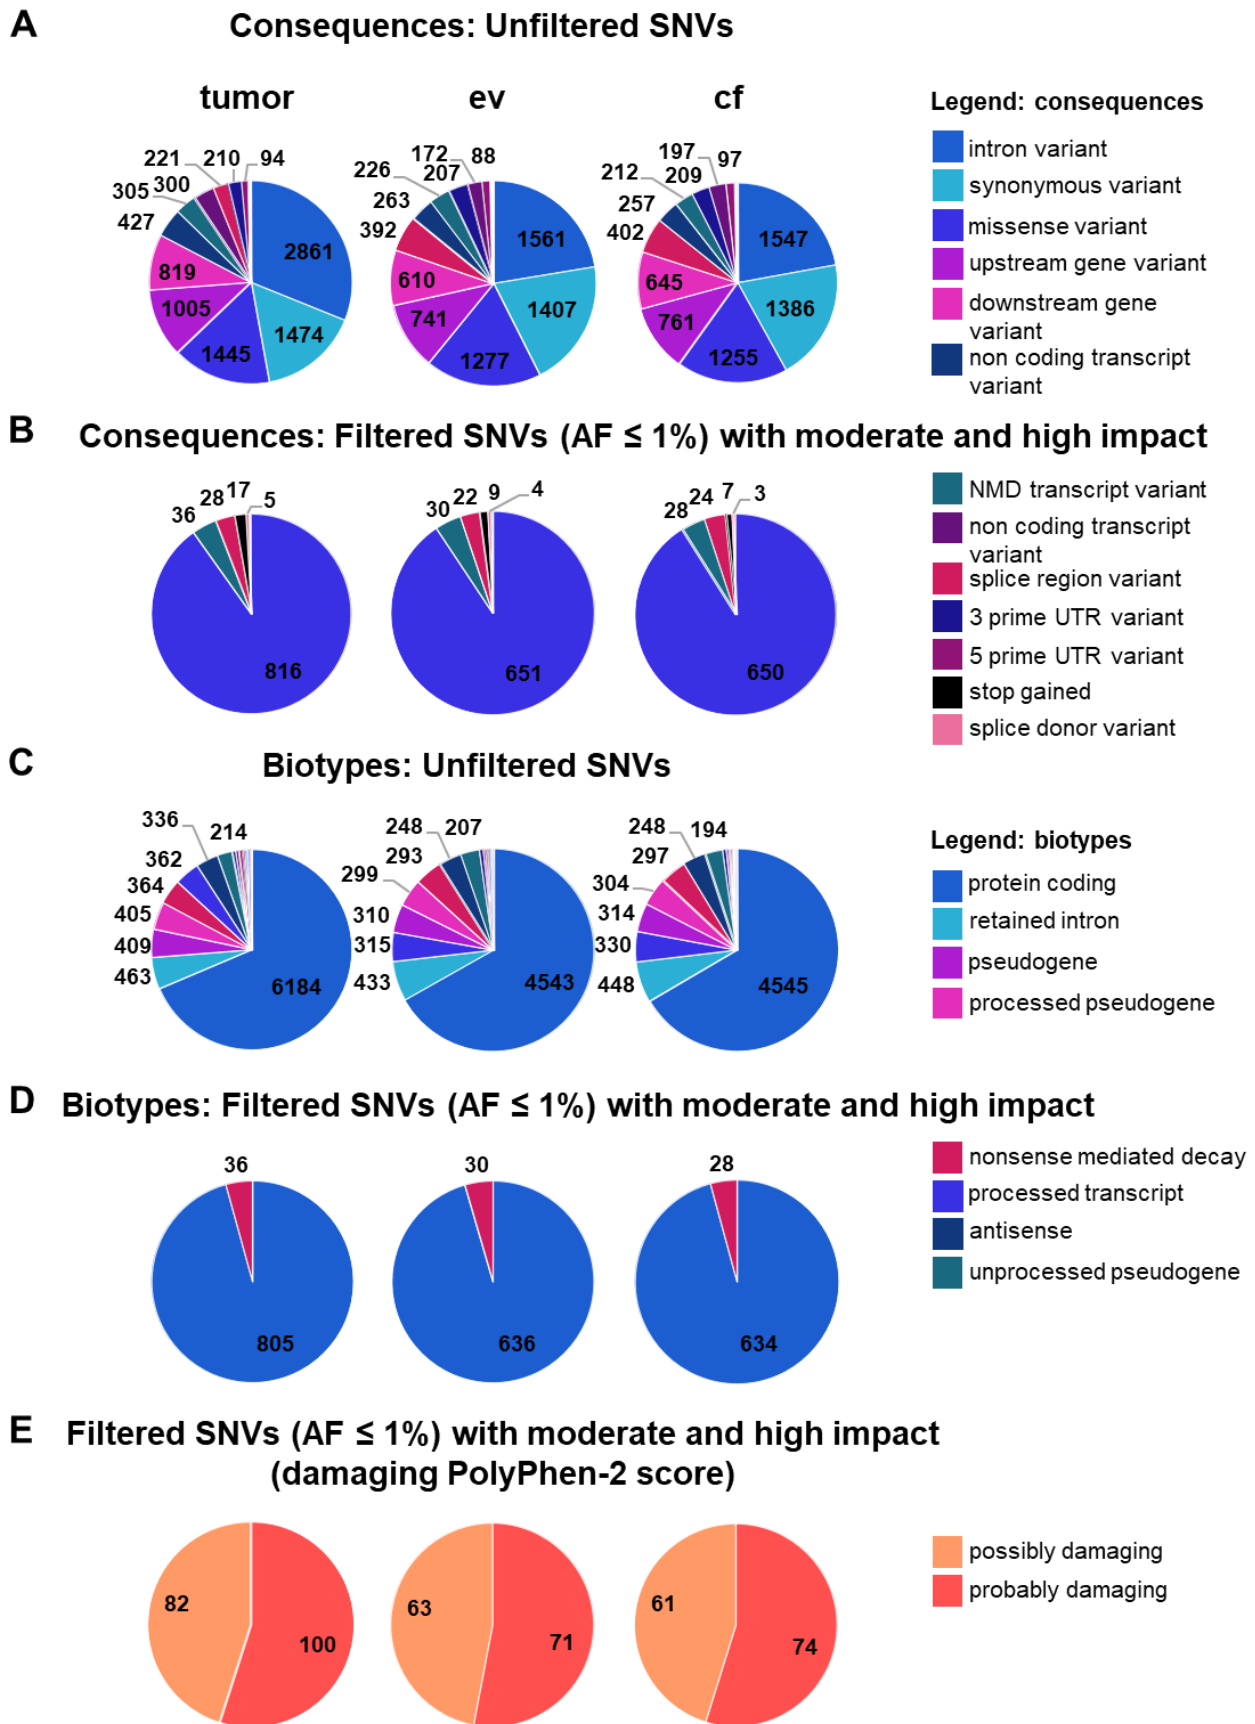

**Supplemental Figure S22:** Analysis of SNVs for patient 7. (A) Consequences of unfiltered SNVs and (B) filtered SNVs (AF ≤ 1%) with moderate and high impact, (C) biotypes of unfiltered and (D) filtered SNVs (AF ≤ 1%) with moderate and high impact as well as (E) number of variants with a possibly or probably damaging PP-2 score of filtered SNVs (AF ≤ 1%) with moderate and high impact found in tumor-, ev- and cfDNA.

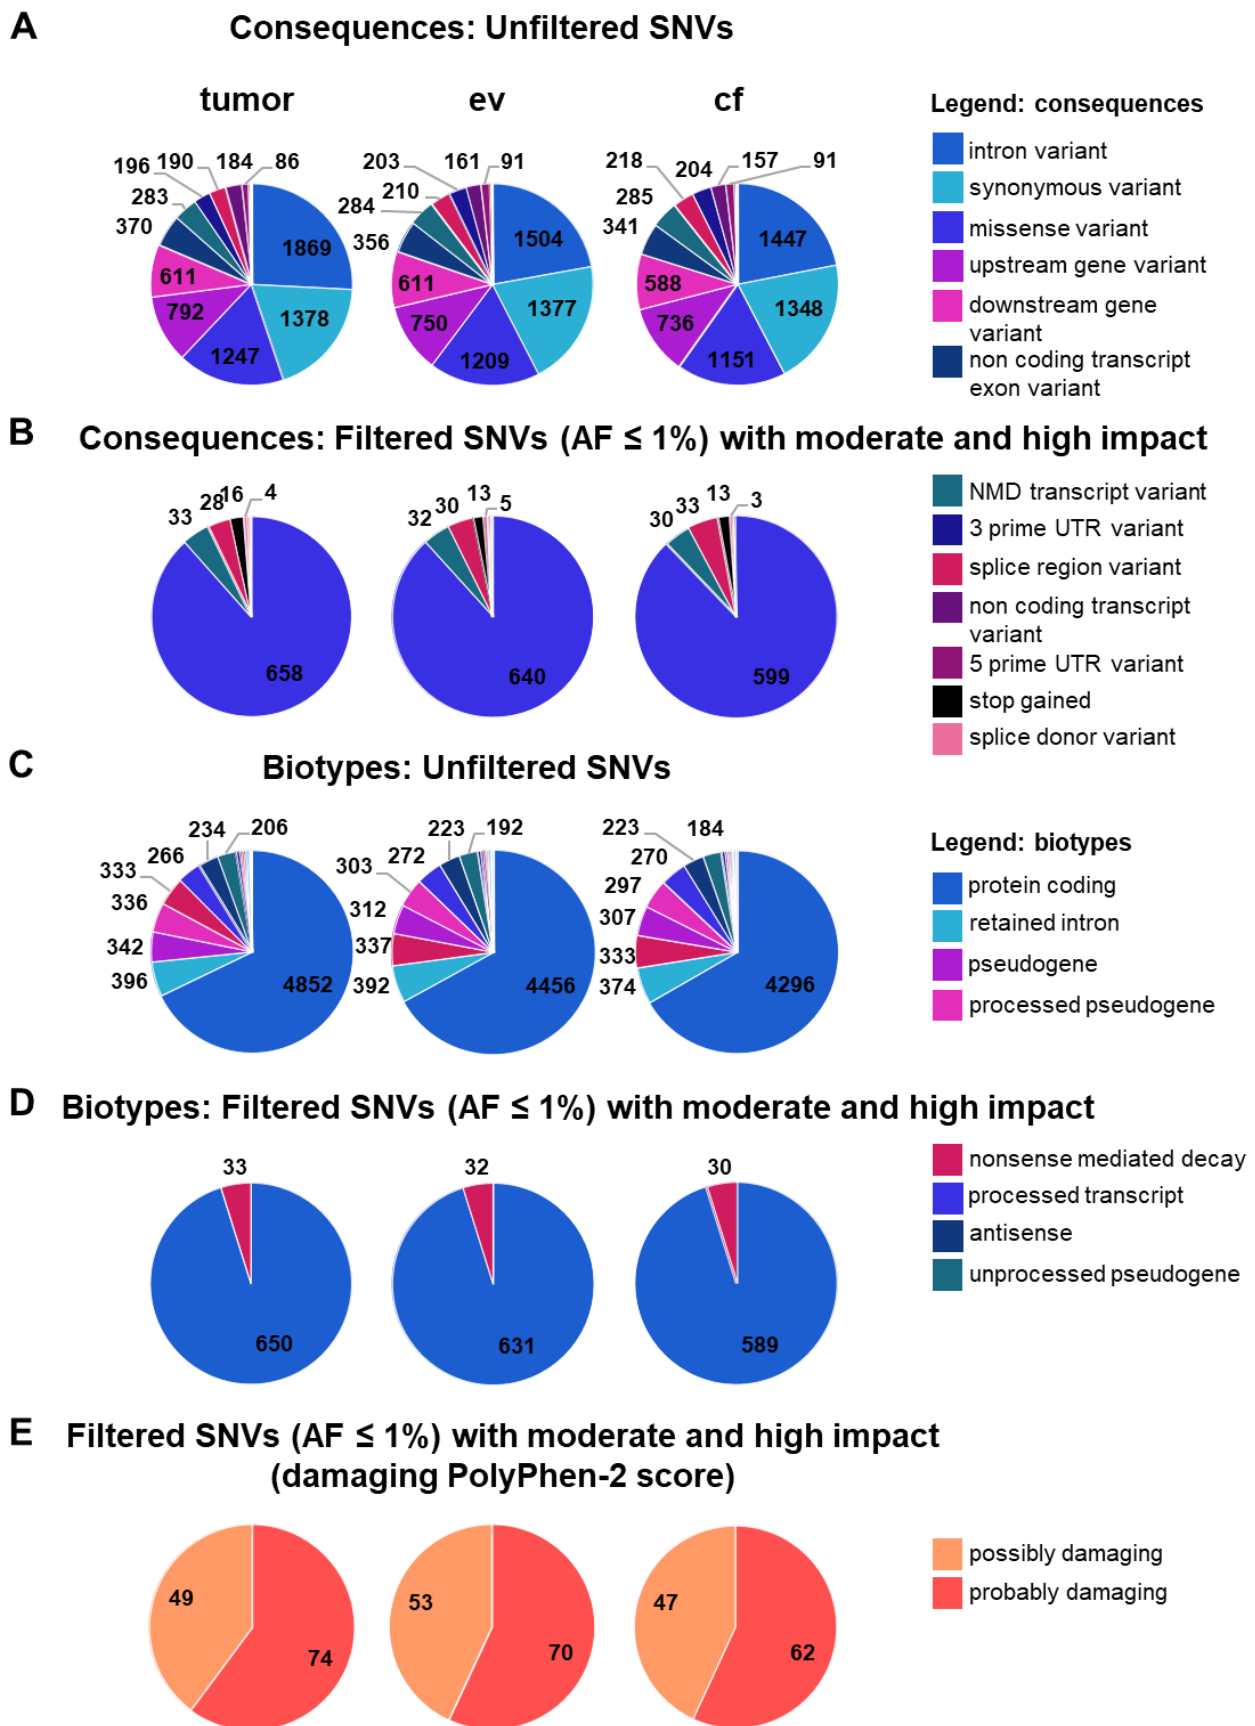

**Supplemental Figure S23:** Analysis of SNVs for patient 8. (A) Consequences of unfiltered SNVs and (B) filtered SNVs (AF ≤ 1%) with moderate and high impact, (C) biotypes of unfiltered and (D) filtered SNVs (AF ≤ 1%) with moderate and high impact as well as (E) number of variants with a possibly or probably damaging PP-2 score of filtered SNVs (AF ≤ 1%) with moderate and high impact found in tumor-, ev- and cfDNA.



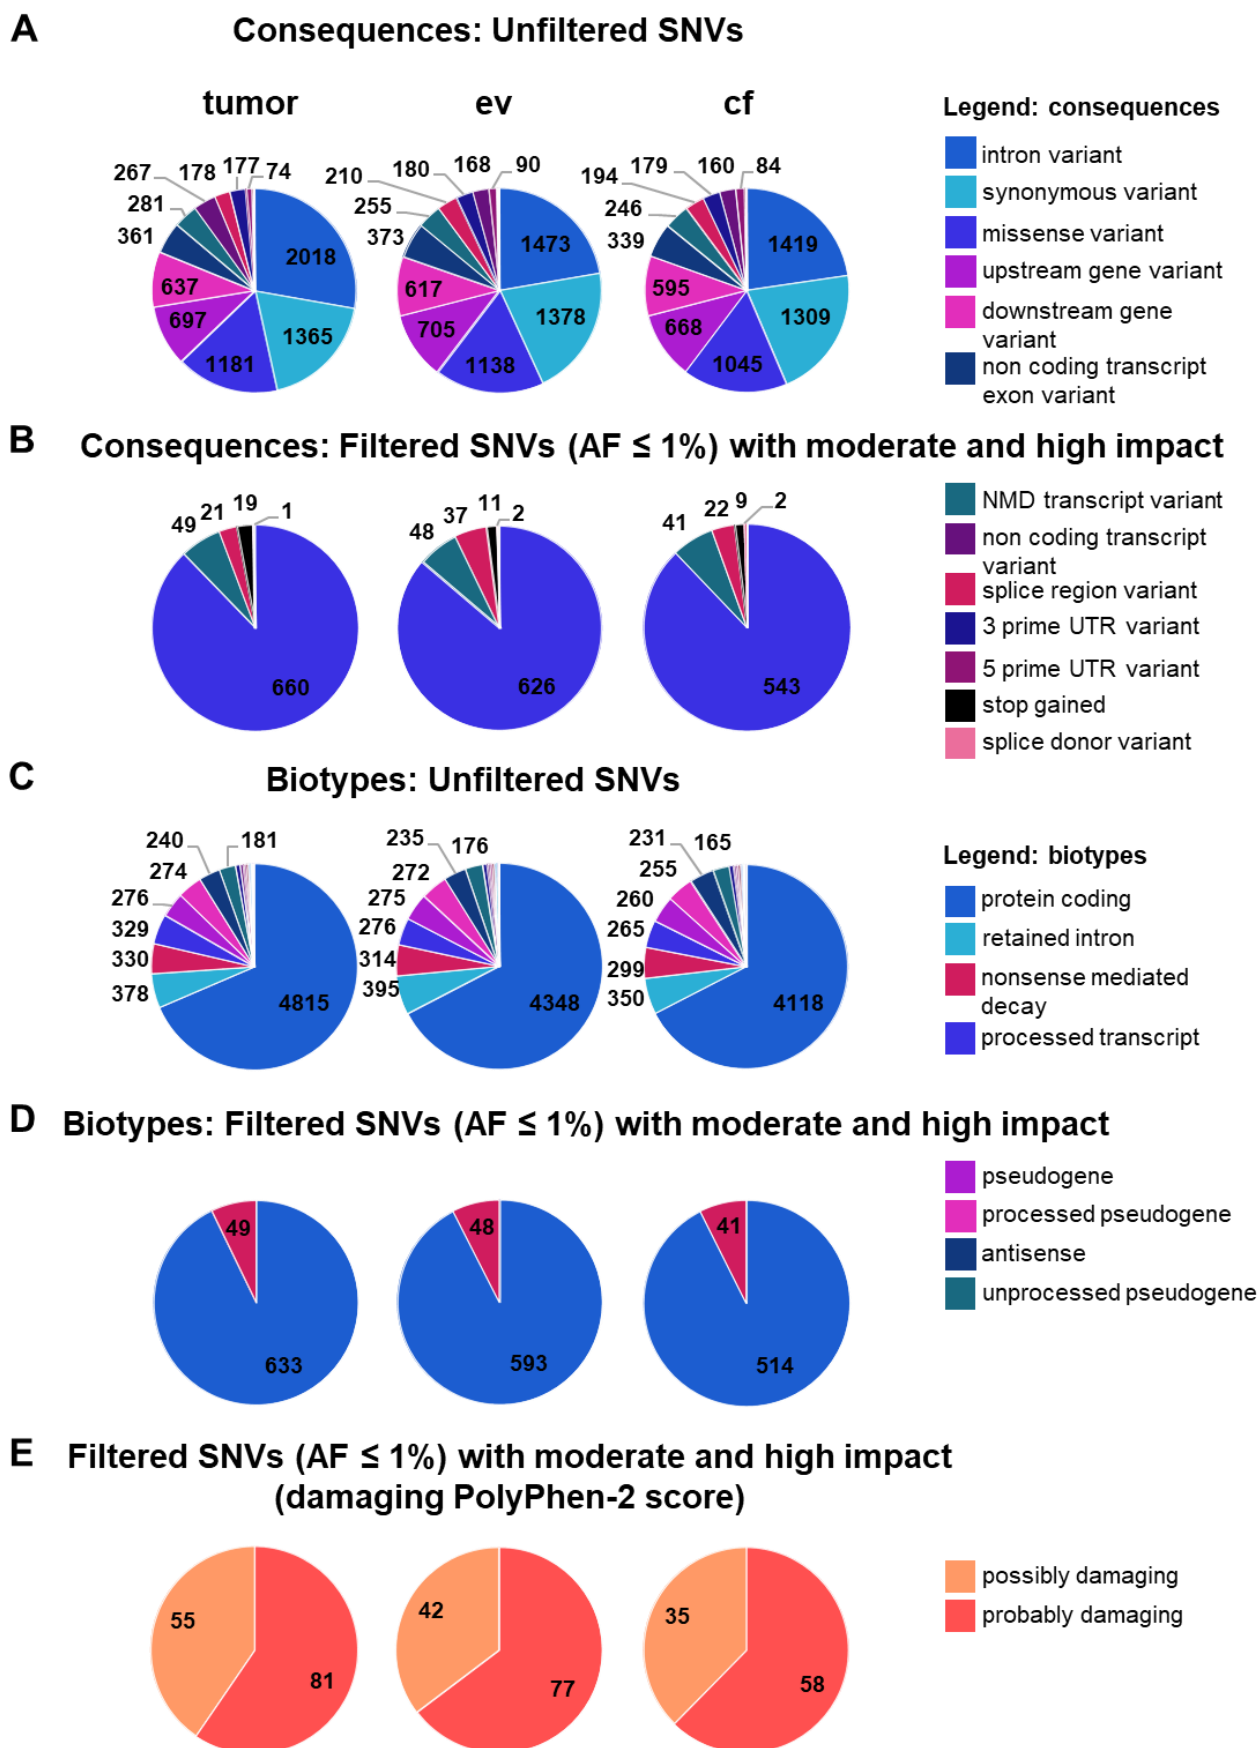

**Supplemental Figure S24:** Analysis of SNVs for patient 9. (A) Consequences of unfiltered SNVs and (B) filtered SNVs (AF ≤ 1%) with moderate and high impact, (C) biotypes of unfiltered and (D) filtered SNVs (AF ≤ 1%) with moderate and high impact as well as (E) number of variants with a possibly or probably damaging PP-2 score of filtered SNVs (AF ≤ 1%) with moderate and high impact found in tumor-, ev- and cfDNA.

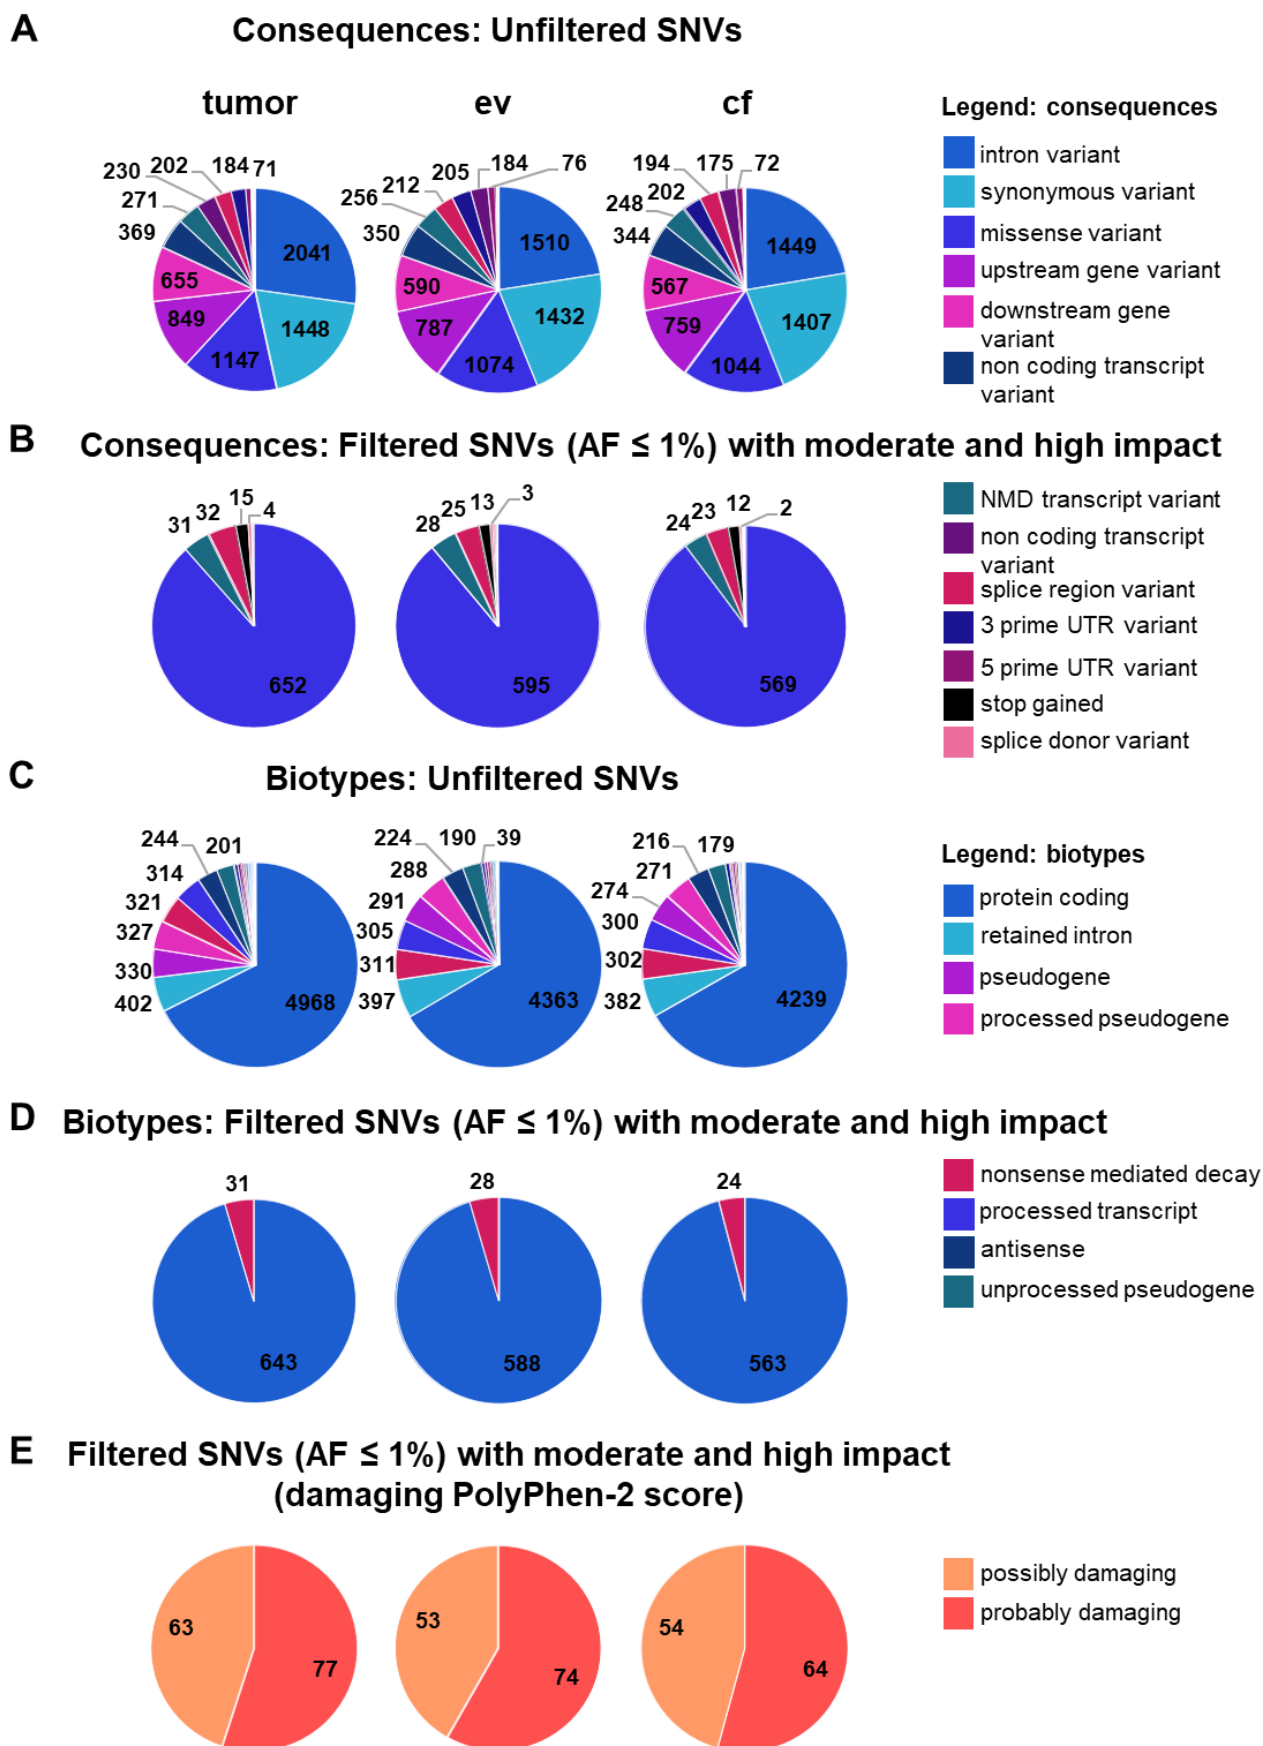

**Supplemental Figure S25:** Analysis of SNVs for patient 10. (A) Consequences of unfiltered SNVs and (B) filtered SNVs (AF ≤ 1%) with moderate and high impact, (C) biotypes of unfiltered and (D) filtered SNVs (AF ≤ 1%) with moderate and high impact as well as (E) number of variants with a possibly or probably damaging PP-2 score of filtered SNVs (AF ≤ 1%) with moderate and high impact found in tumor-, ev- and cfDNA.

## A Consequences: Filtered Indels with moderate and high impact

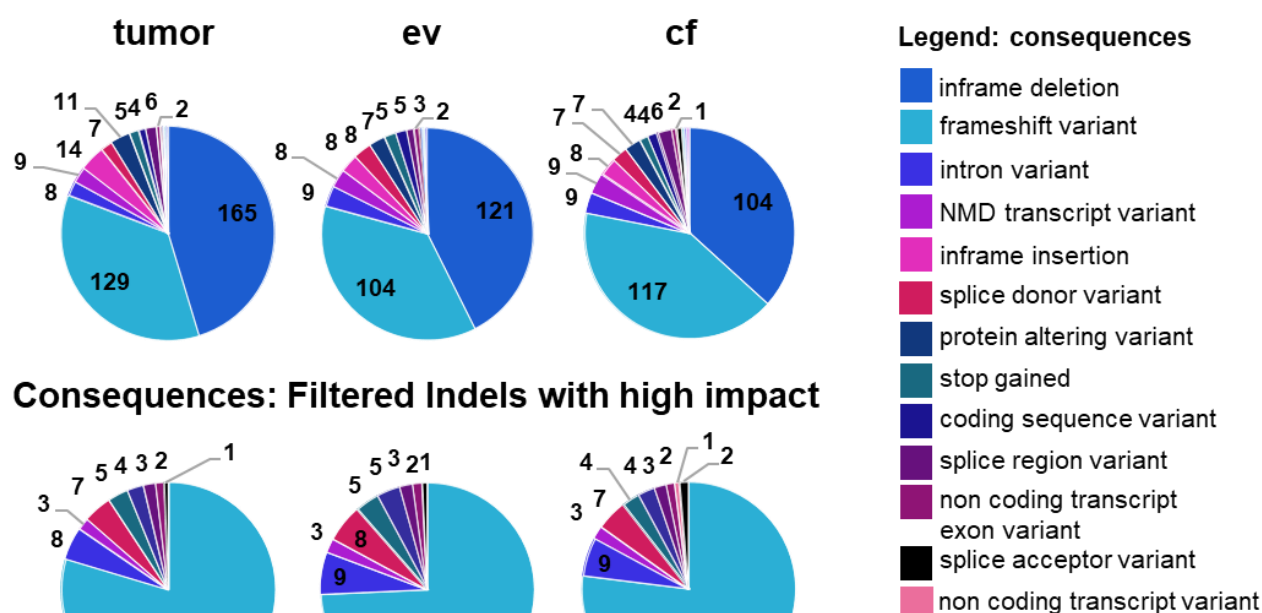

## B Consequences: Filtered Indels with high impact

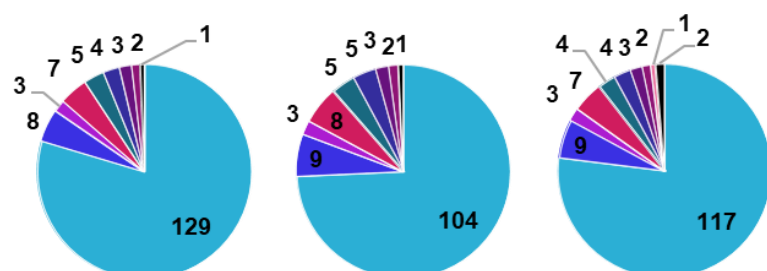

## C Biotypes: Filtered Indels with moderate and high impact

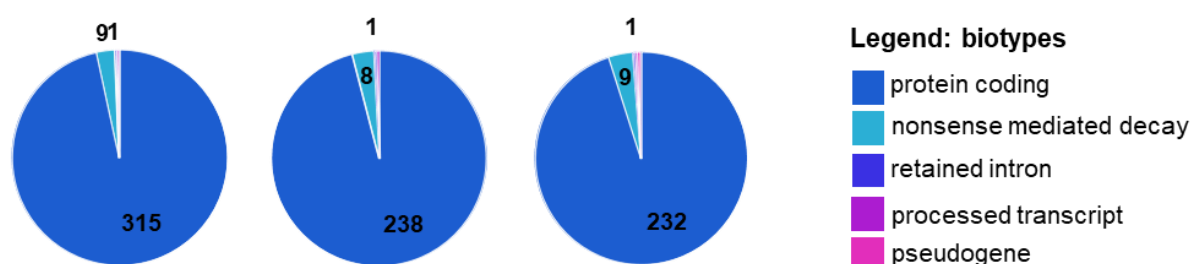

## D Biotypes: Filtered Indels with high impact

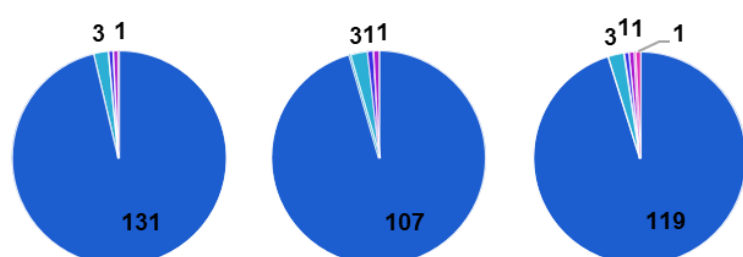

**Supplemental Figure S26:** Analysis of Indels for patient 1. (A) Consequences of Indels with moderate and high impact as well as (B) Indels with high impact. (C) Biotypes of Indels with moderate and high impact as well as (D) Indels with high impact found in tumor-, ev- and cfDNA.



## A Consequences: Filtered Indels with moderate and high impact

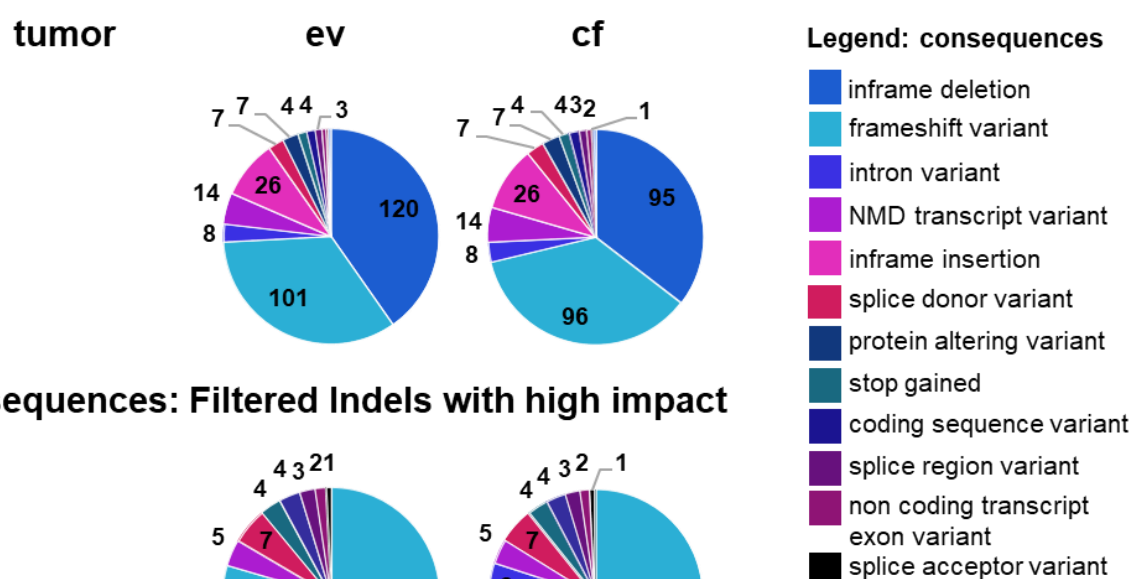

## B Consequences: Filtered Indels with high impact

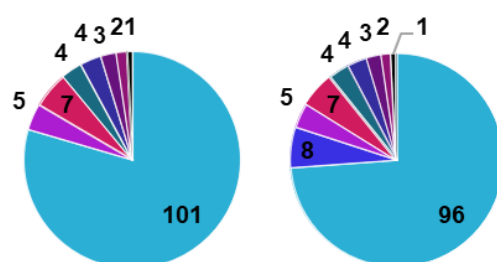

## C Biotypes: Filtered Indels with moderate and high impact

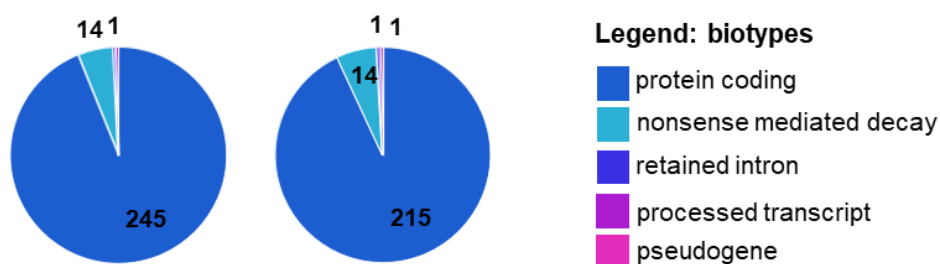

## D Biotypes: Filtered Indels with high impact

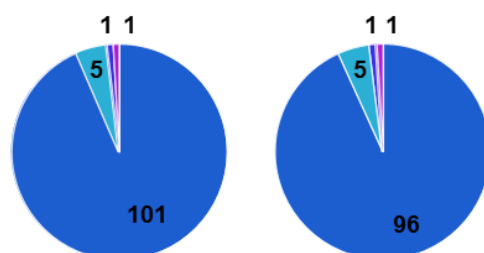

**Supplemental Figure S27:** Analysis of Indels for patient 2. (A) Consequences of Indels with moderate and high impact as well as (B) Indels with high impact. (C) Biotypes of Indels with moderate and high impact as well as (D) Indels with high impact found in tumor-, ev- and cfDNA.

## A Consequences: Filtered Indels with moderate and high impact

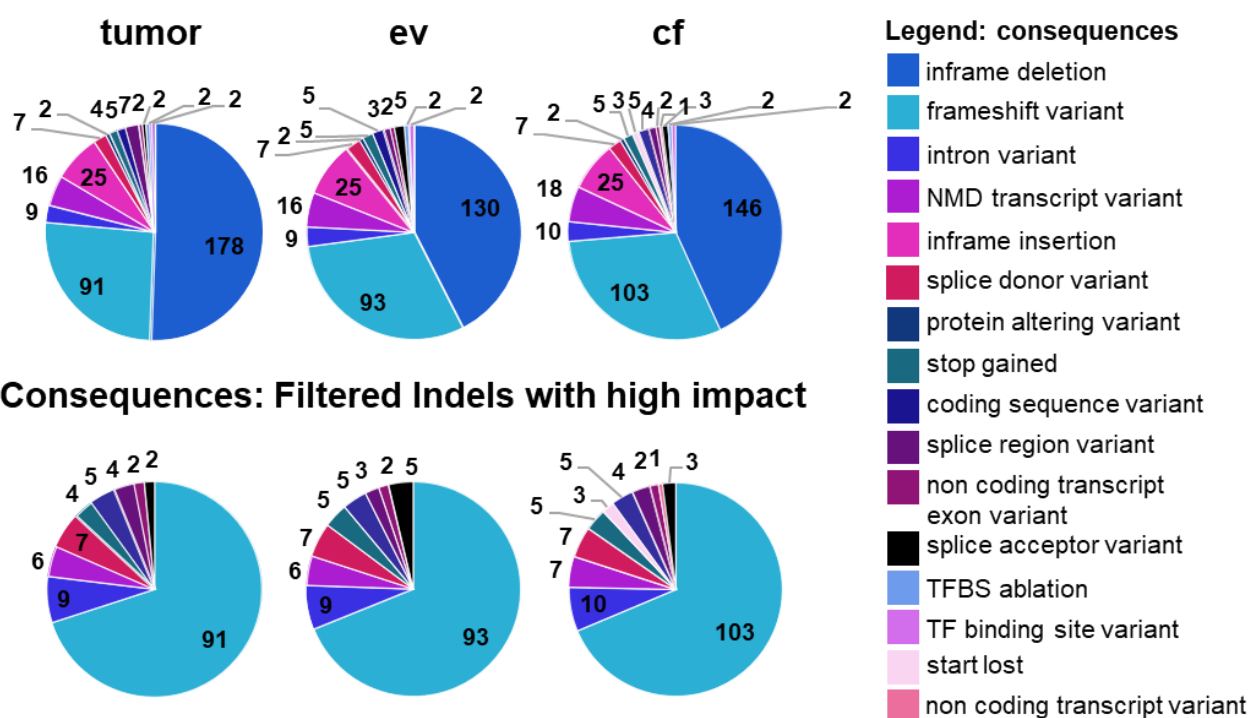

## B Consequences: Filtered Indels with high impact

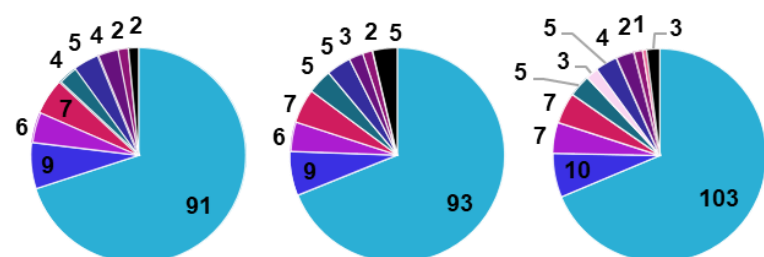

## C Biotypes: Filtered Indels with moderate and high impact

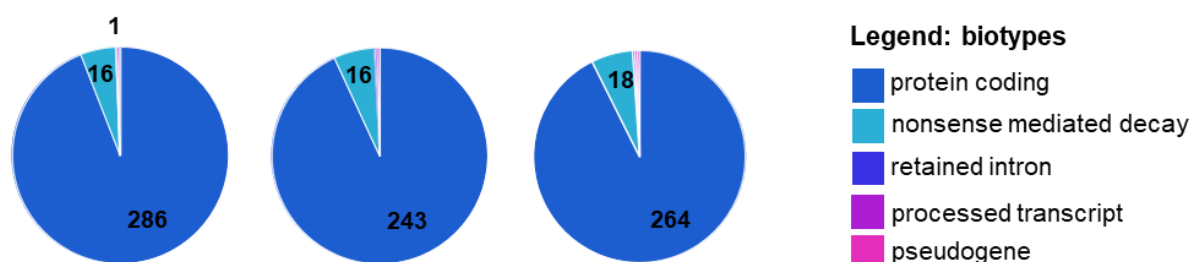

## D Biotypes: Filtered Indels with high impact

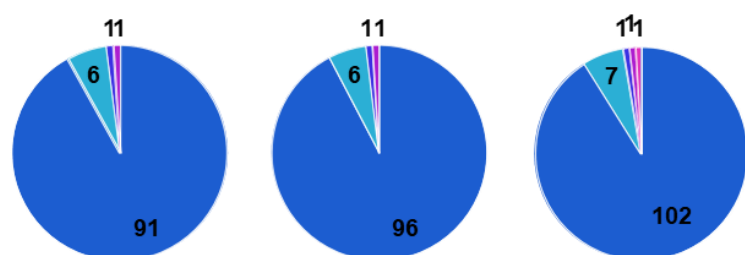

**Supplemental Figure S28:** Analysis of Indels for patient 3. (A) Consequences of Indels with moderate and high impact as well as (B) Indels with high impact. (C) Biotypes of Indels with moderate and high impact as well as (D) Indels with high impact found in tumor-, ev- and cfDNA.

## A Consequences: Filtered Indels with moderate and high impact

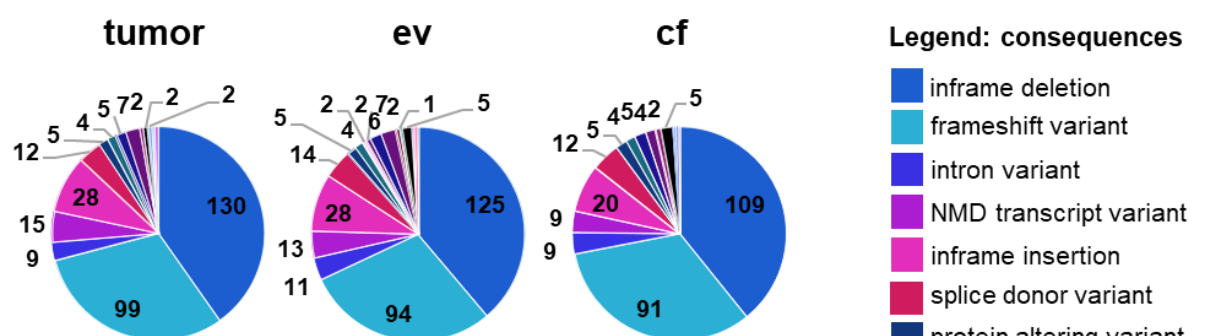

## B Consequences: Filtered Indels with high impact

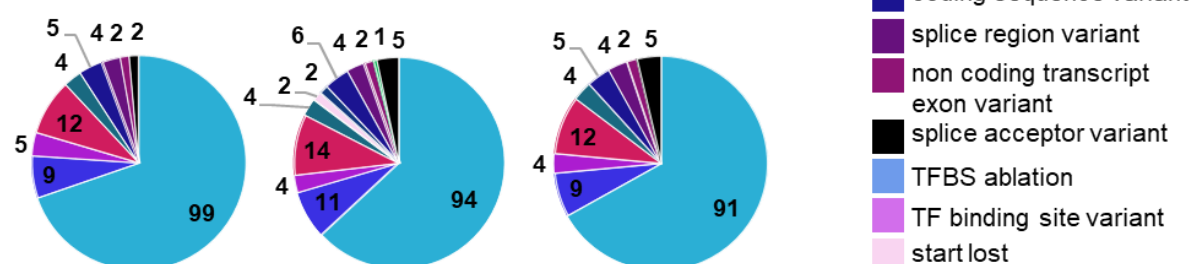

## C Biotypes: Filtered Indels with moderate and high impact

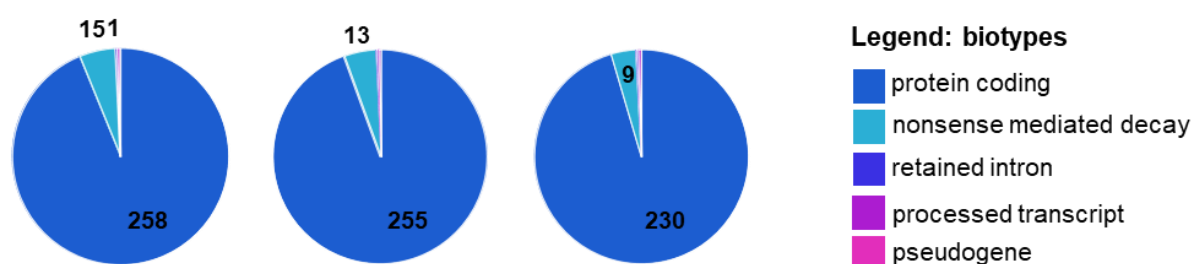

## D Biotypes: Filtered Indels with high impact

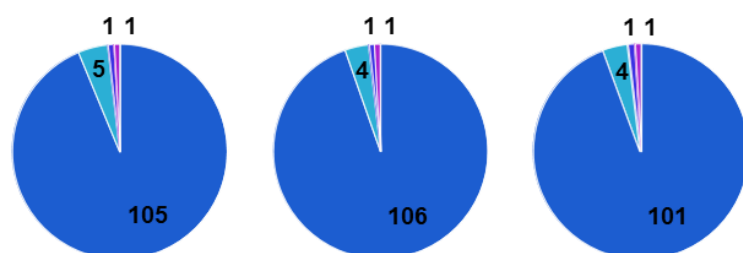

**Supplemental Figure S29:** Analysis of Indels for patient 4. (A) Consequences of Indels with moderate and high impact as well as (B) Indels with high impact. (C) Biotypes of Indels with moderate and high impact as well as (D) Indels with high impact found in tumor-, ev- and cfDNA.

## A Consequences: Filtered Indels with moderate and high impact

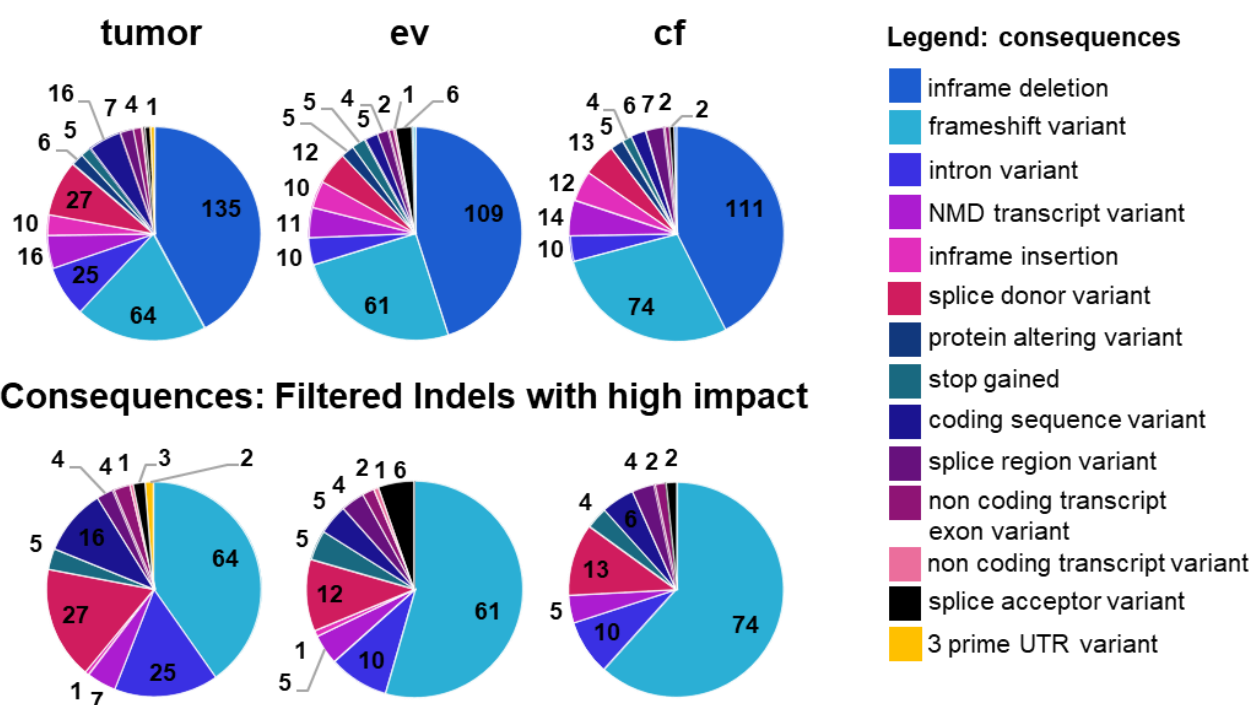

## B Consequences: Filtered Indels with high impact

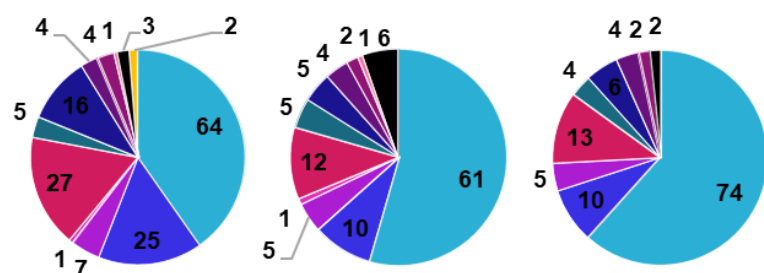

## C Biotypes: Filtered Indels with moderate and high impact

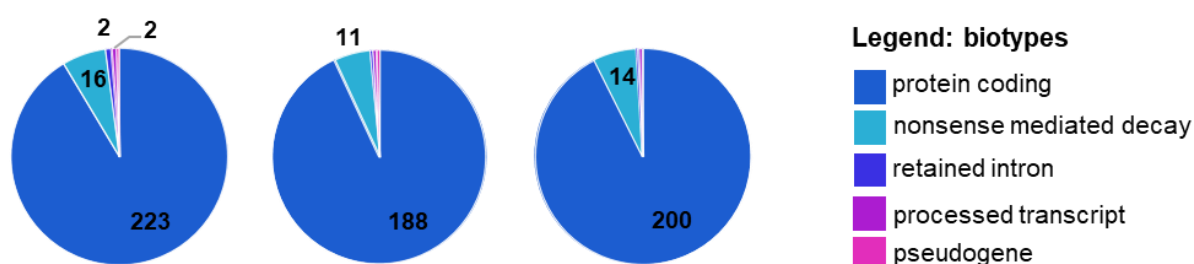

## D Biotypes: Filtered Indels with high impact

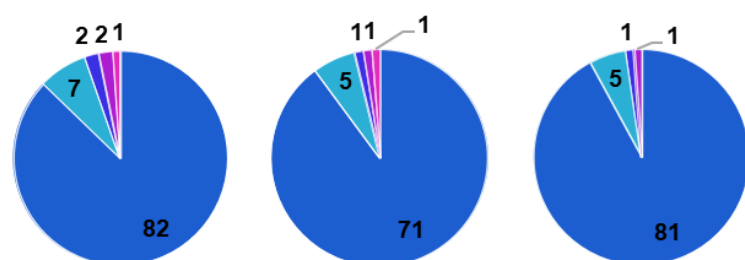

**Supplemental Figure S30:** Analysis of Indels for patient 5. (A) Consequences of Indels with moderate and high impact as well as (B) Indels with high impact. (C) Biotypes of Indels with moderate and high impact as well as (D) Indels with high impact found in tumor-, ev- and cfDNA.

## A Consequences: Filtered Indels with moderate and high impact

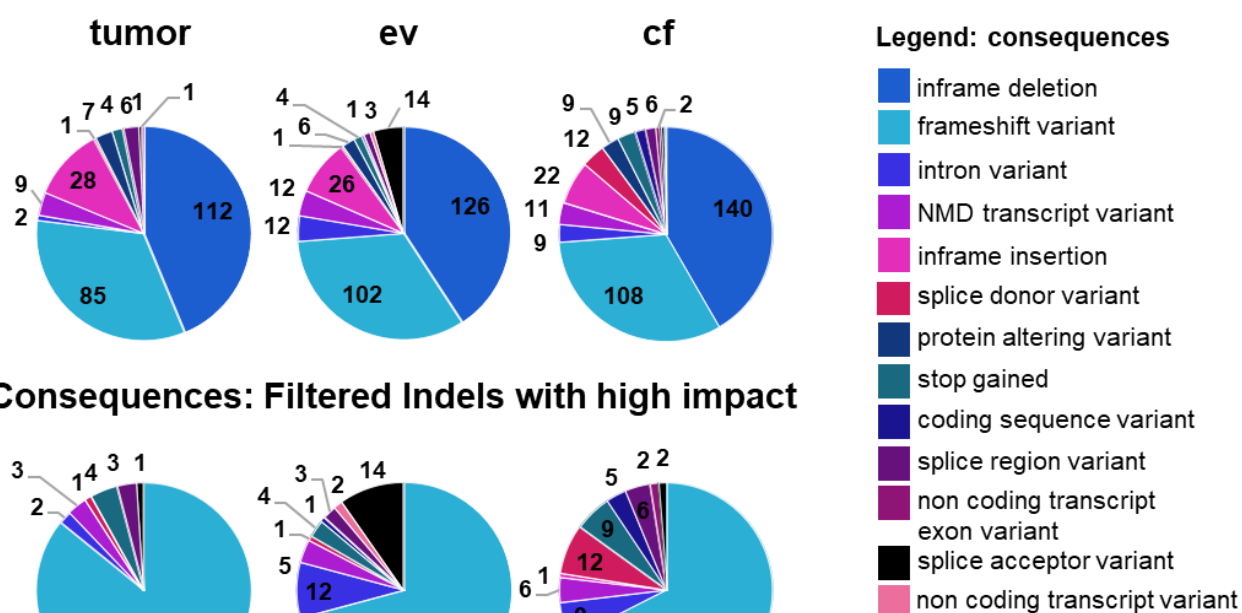

## B Consequences: Filtered Indels with high impact

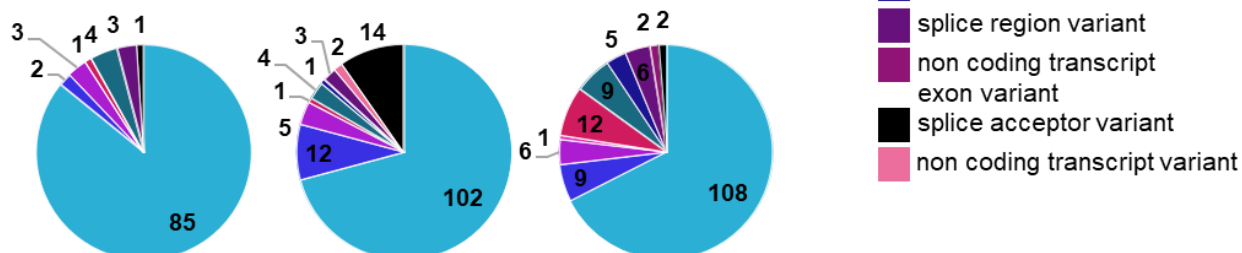

## C Biotypes: Filtered Indels with moderate and high impact

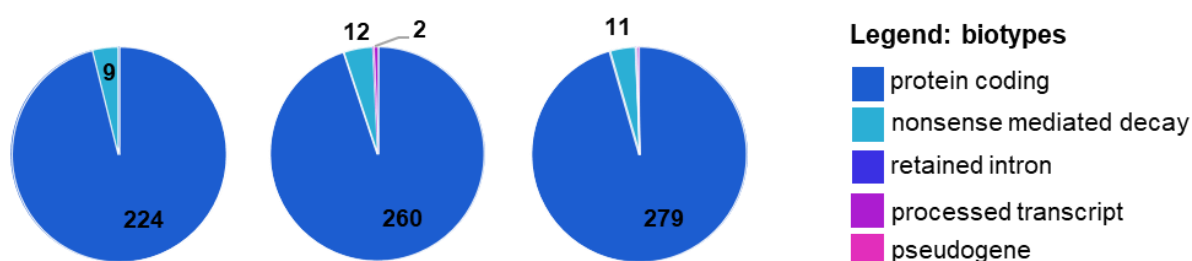

## D Biotypes: Filtered Indels with high impact

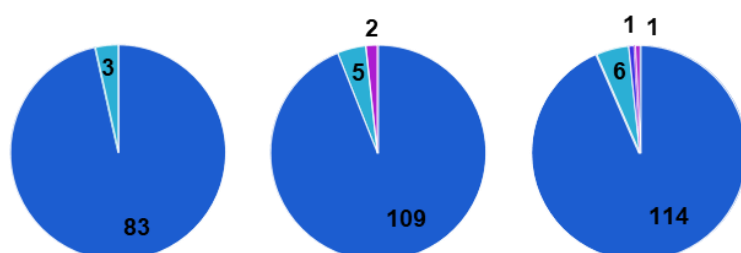

**Supplemental Figure S31:** Analysis of Indels for patient 6. (A) Consequences of Indels with moderate and high impact as well as (B) Indels with high impact. (C) Biotypes of Indels with moderate and high impact as well as (D) Indels with high impact found in tumor-, ev- and cfDNA.

## A Consequences: Filtered Indels with moderate and high impact

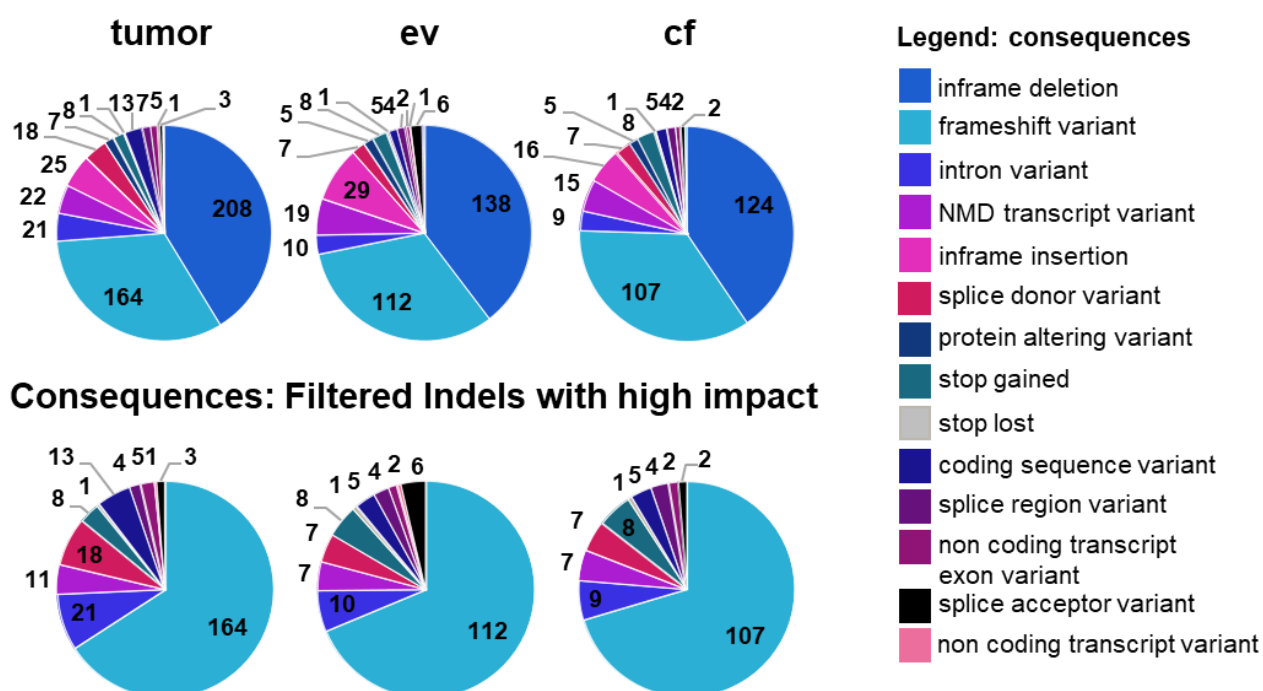

## B Consequences: Filtered Indels with high impact

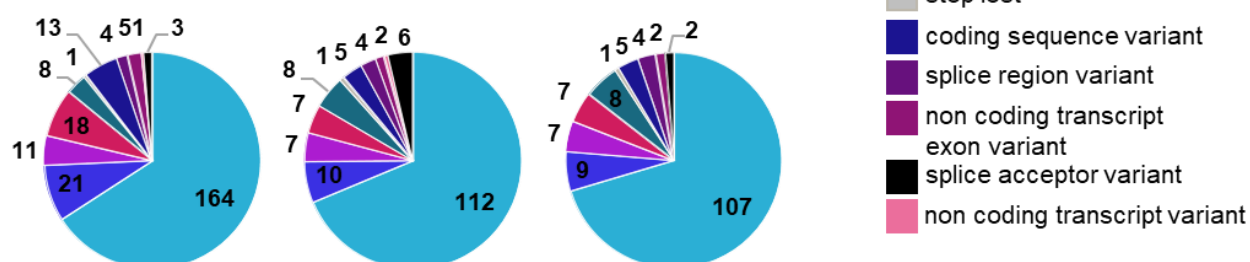

## C Biotypes: Filtered Indels with moderate and high impact

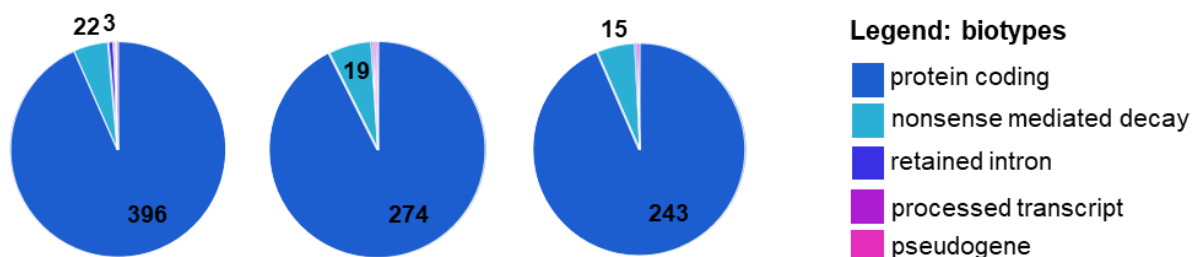

## D Biotypes: Filtered Indels with high impact

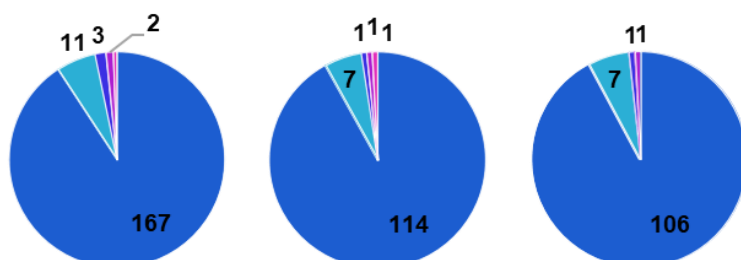

**Supplemental Figure S32:** Analysis of Indels for patient 7. (A) Consequences of Indels with moderate and high impact as well as (B) Indels with high impact. (C) Biotypes of Indels with moderate and high impact as well as (D) Indels with high impact found in tumor-, ev- and cfDNA.

## A Consequences: Filtered Indels with moderate and high impact

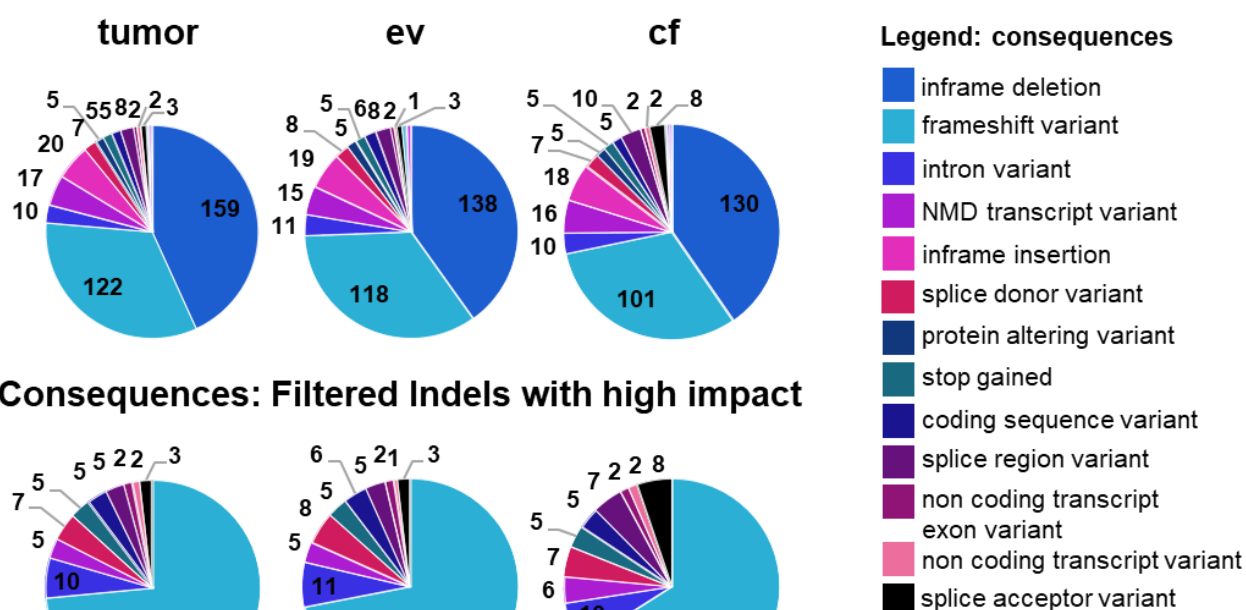

## B Consequences: Filtered Indels with high impact

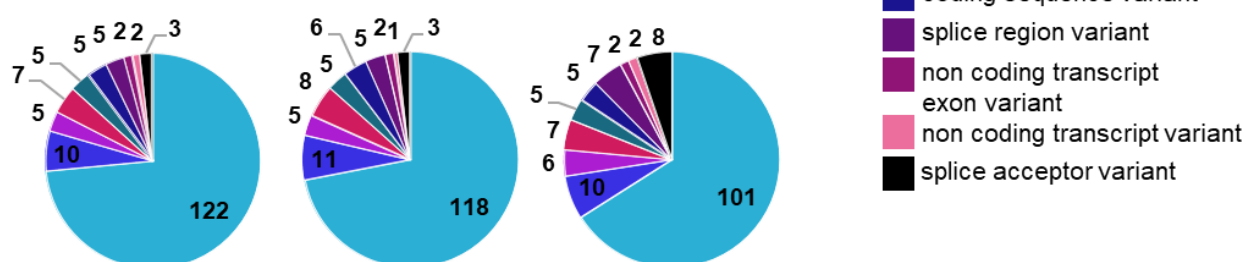

## C Biotypes: Filtered Indels with moderate and high impact

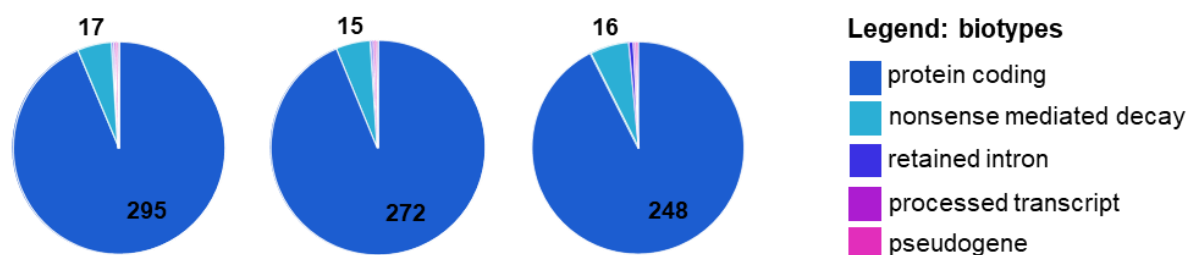

## D Biotypes: Filtered Indels with high impact

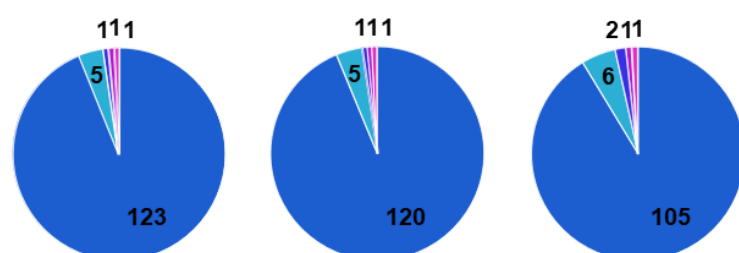

**Supplemental Figure S33:** Analysis of Indels for patient 8. (A) Consequences of Indels with moderate and high impact as well as (B) Indels with high impact. (C) Biotypes of Indels with moderate and high impact as well as (D) Indels with high impact found in tumor-, ev- and cfDNA.



## A Consequences: Filtered Indels with moderate and high impact

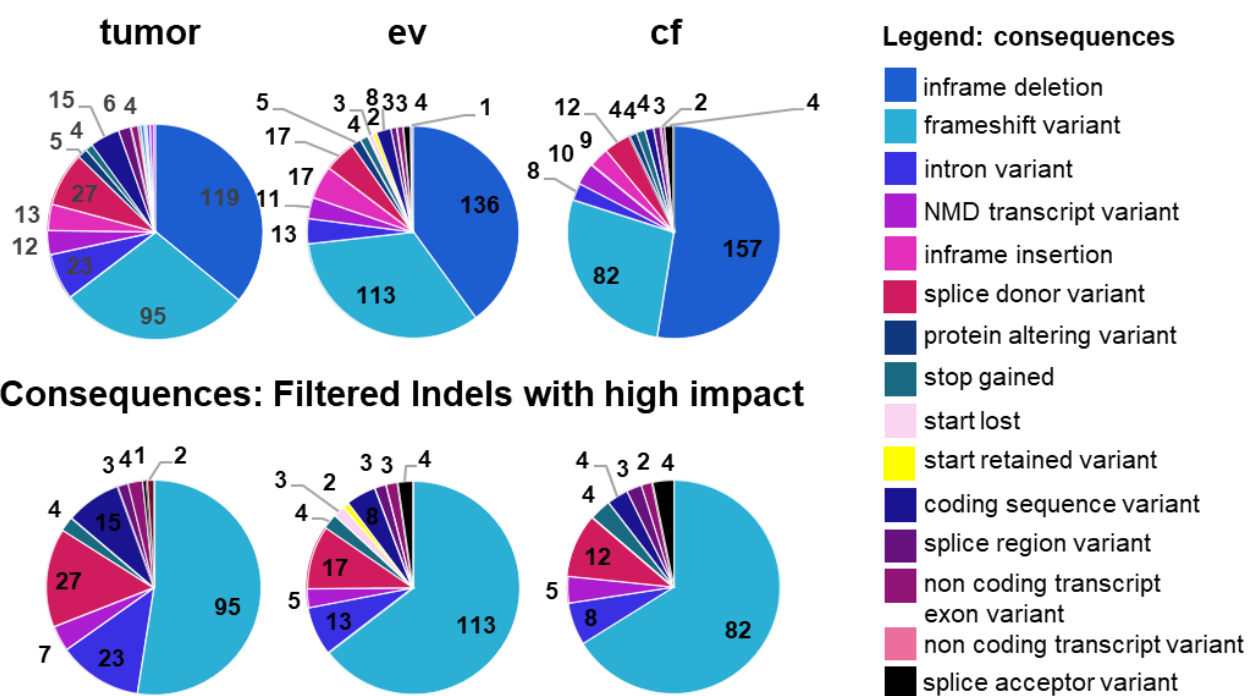

## B Consequences: Filtered Indels with high impact

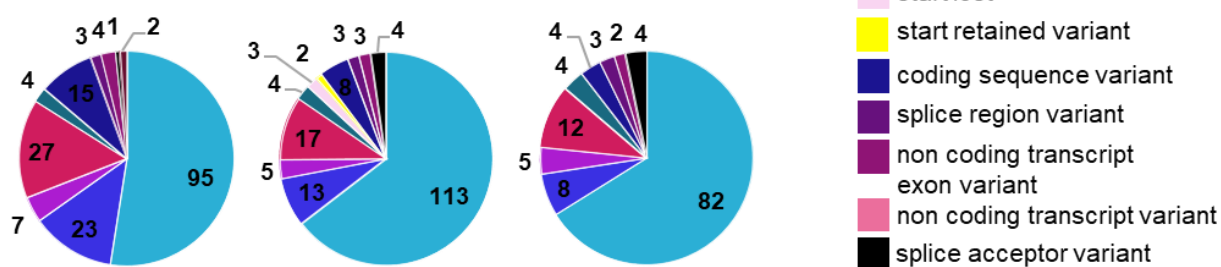

## C Biotypes: Filtered Indels with moderate and high impact

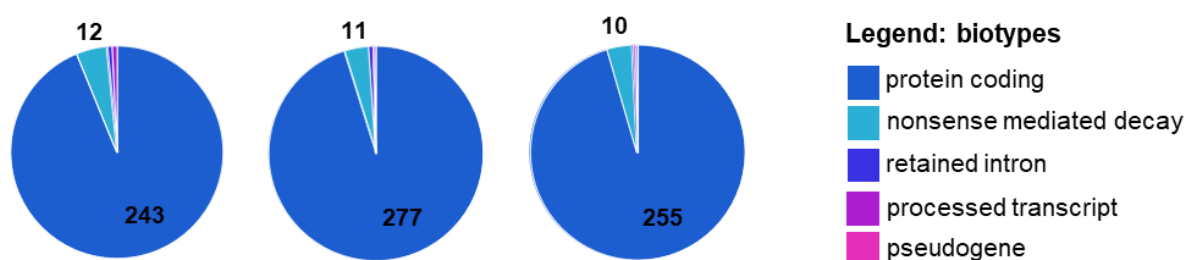

## D Biotypes: Filtered Indels with high impact

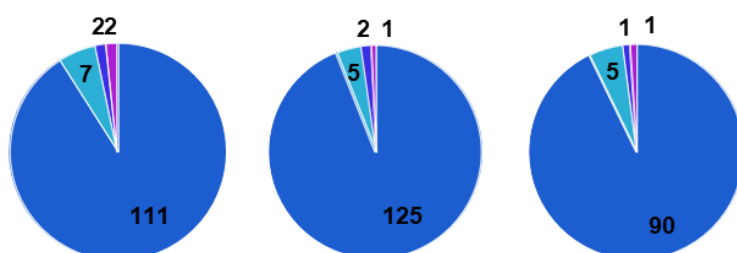

**Supplemental Figure S34:** Analysis of Indels for patient 9. (A) Consequences of Indels with moderate and high impact as well as (B) Indels with high impact. (C) Biotypes of Indels with moderate and high impact as well as (D) Indels with high impact found in tumor-, ev- and cfDNA.



## A Consequences: Filtered Indels with moderate and high impact

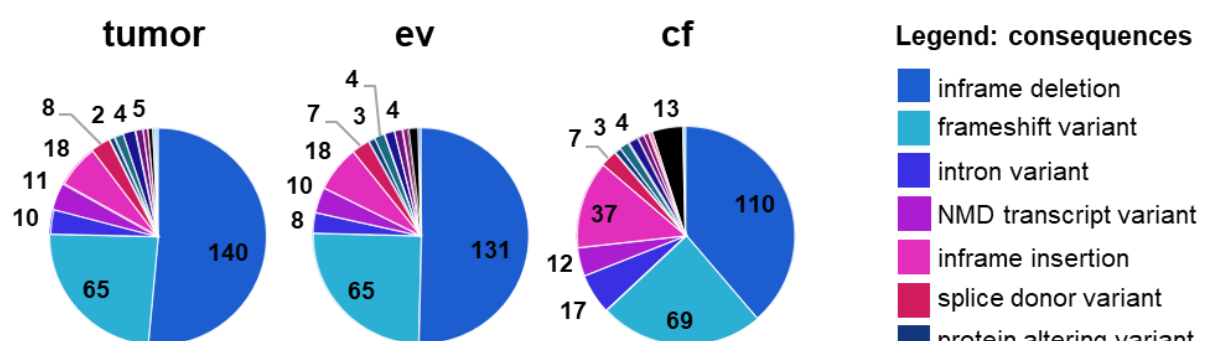

## B Consequences: Filtered Indels with high impact

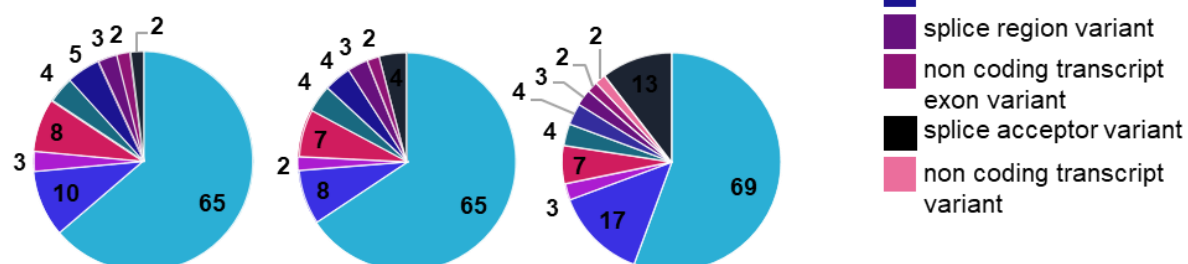

## C Biotypes: Filtered Indels with moderate and high impact

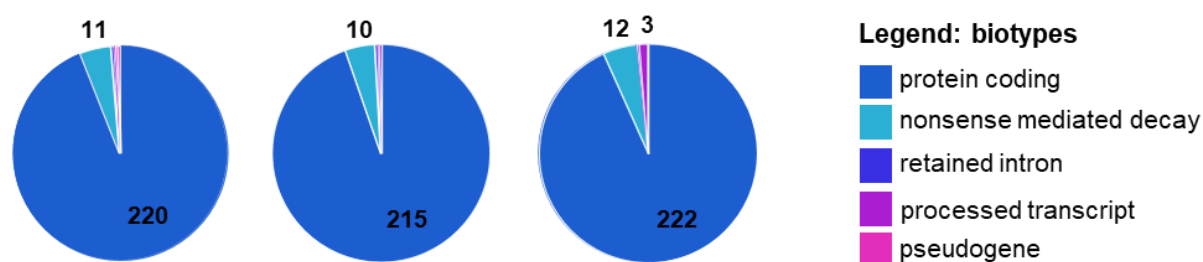

## D Biotypes: Filtered Indels with high impact

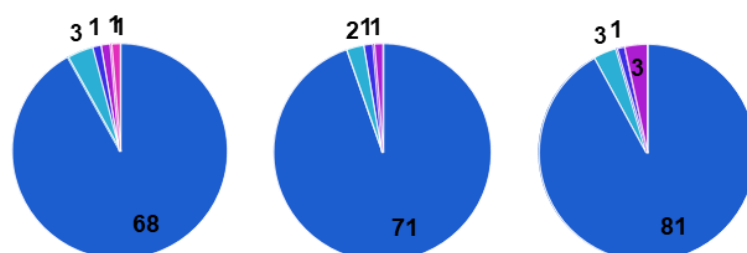

**Supplemental Figure S35:** Analysis of Indels for patient 10. (A) Consequences of Indels with moderate and high impact as well as (B) Indels with high impact. (C) Biotypes of Indels with moderate and high impact as well as (D) Indels with high impact found in tumor-, ev- and cfDNA.

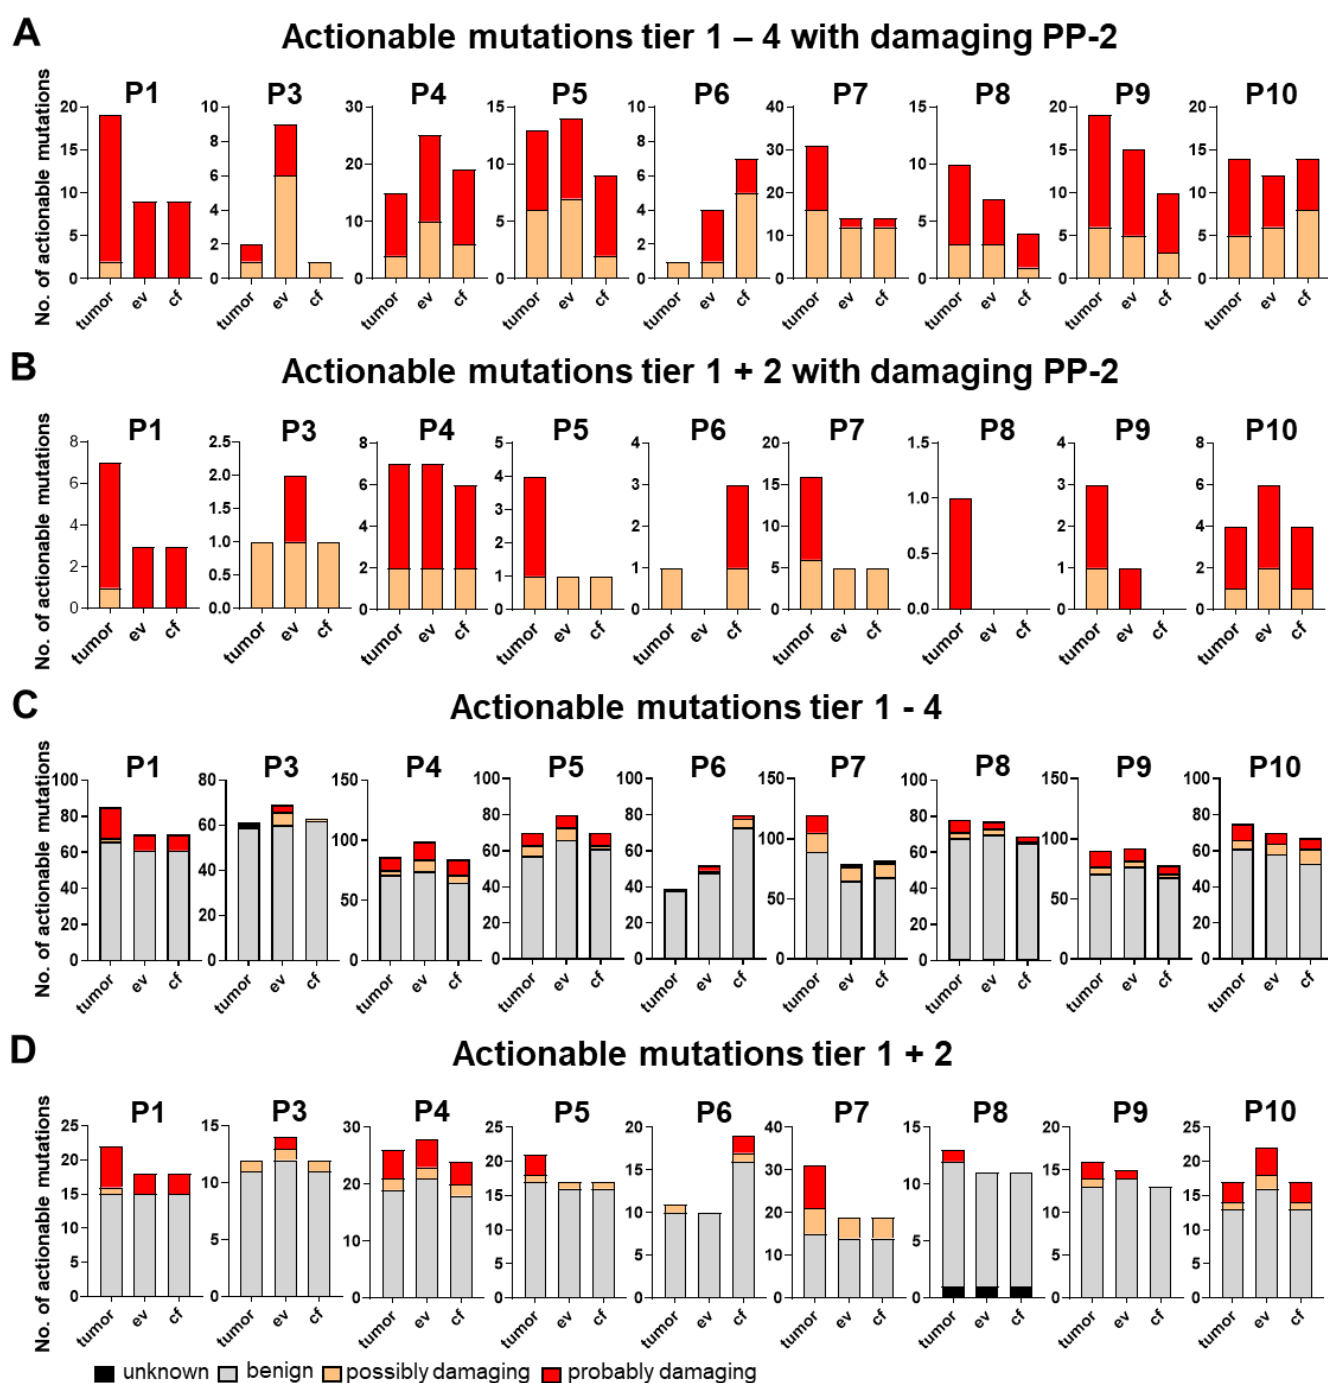

**Supplemental Figure S36:** Analysis of actionable variants. Absolute numbers of actionable variants with damaging PP-2 score (A) tier 1-4 and (B) tier 1+2 as well as absolute numbers of all PP-2 classified actionable variants (C) tier 1-4 and (D) tier 1+2 found in filtered SNVs with moderate and high impact of tumor-, ev- and cfDNA per patient.

## Western Blot raw data

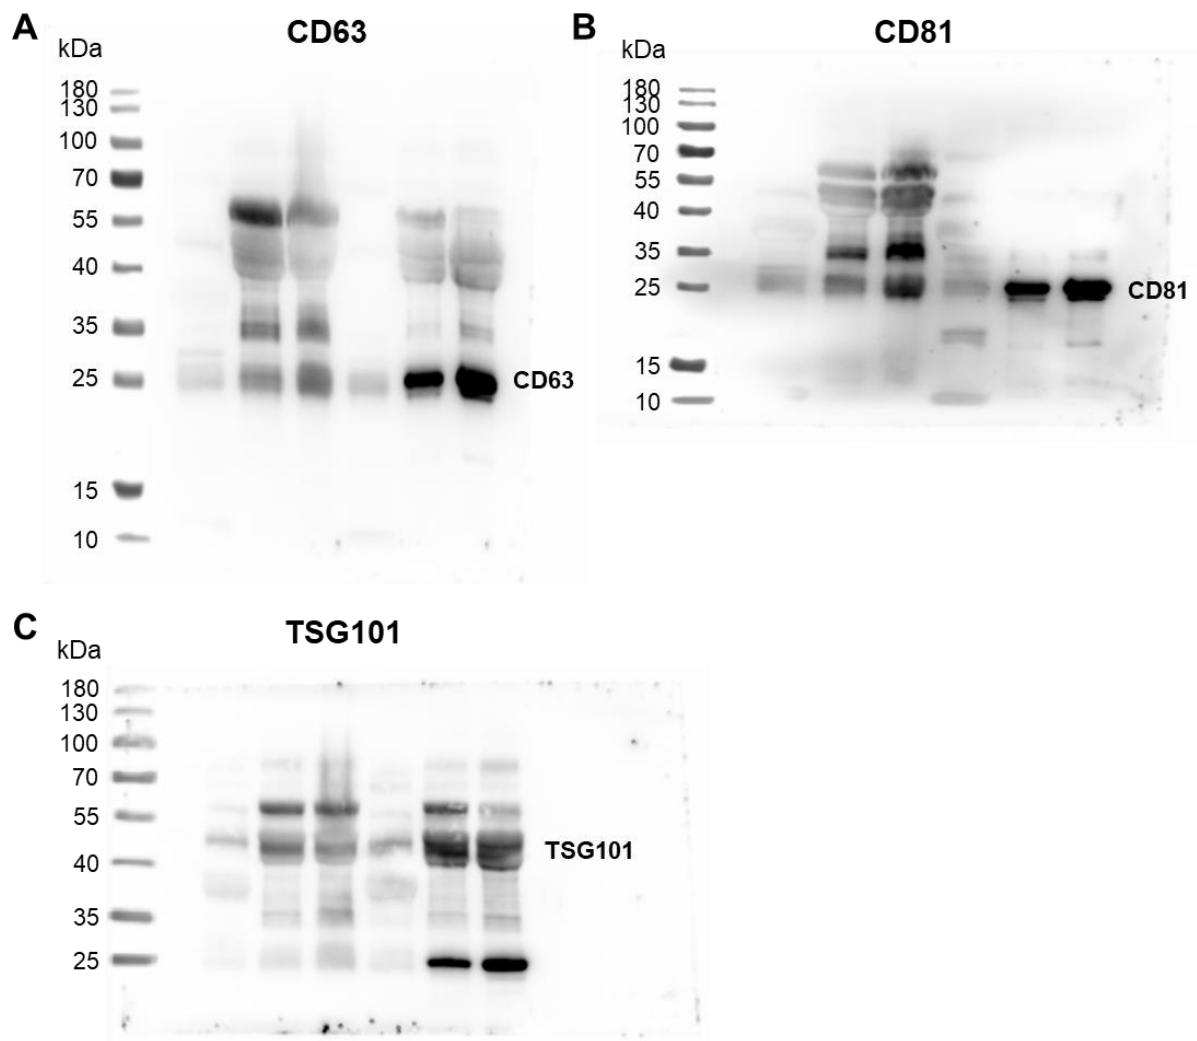

**Supplemental Figure S37:** Western Blot raw data showing all bands and molecular weight markers. (A) Raw data of CD63 blot. (B) Raw data of CD81 blot. (C) Raw data of TSG101 blot.
